# Supplementary material for: Transcriptomic Profiling Identifies Differentially Expressed Genes in Palbociclib-Resistant ER+ MCF7 Breast Cancer Cells
Source: Genes (Basel). 2020 Apr 24;11(4):467. doi: 10.3390/genes11040467 (PMC7230561; doi:10.3390/genes11040467)
Supplement: Supplementary file 1 [file genes-11-00467-s001.xlsx]

## Sheet: Supplemental File 1 MCF7_pS_VS_
ENSEMBL GENE	ENSEMBL TRANSCRIPT	ENTREZ ID	GENE SYMBOL|DESCRIPTION	LOCUS	Gene Ontology	KEGG	Unipathway	MCF7_Parental	MCF7_Palbociclib	log2FC(MCF7_Palbociclib/MCF7_Parental)	p_value	q_value
ENSG00000000003	ENST00000373020///ENST00000496771///ENST00000494424///ENST00000612152///ENST00000614008	7105	TSPAN6|tetraspanin 6	chrX:100627108-100639991	GO:0016021|integral component of membrane|///GO:0004871|signal transducer activity|///GO:0005887|integral component of plasma membrane|///GO:0007166|cell surface receptor signaling pathway|///GO:0043123|positive regulation of I-kappaB kinase/NF-kappaB signaling|///GO:0005515|protein binding|///GO:0070062|extracellular exosome|///GO:0039532|negative regulation of viral-induced cytoplasmic pattern …			11.493	18.5219	0.688479	0.0001	0.000496109
ENSG00000000005	ENST00000373031///ENST00000485971	64102	TNMD|tenomodulin	chrX:100584801-100599885	GO:0016021|integral component of membrane|///GO:0005737|cytoplasm|///GO:0005515|protein binding|///GO:0005635|nuclear envelope|///GO:0016525|negative regulation of angiogenesis|///GO:0001937|negative regulation of endothelial cell proliferation|///GO:0001886|endothelial cell morphogenesis|///GO:0071773|cellular response to BMP stimulus|///GO:0035990|tendon cell differentiation|			0	0.00797691	18.6778	1	1
ENSG00000000419	ENST00000371588///ENST00000466152///ENST00000371582///ENST00000494752///ENST00000371584///ENST00000413082	8813	DPM1|dolichyl-phosphate mannosyltransferase polypeptide 1, catalytic subunit	chr20:50888918-50958555	GO:0005634|nucleus|///GO:0016020|membrane|///GO:0005789|endoplasmic reticulum membrane|///GO:0005783|endoplasmic reticulum|///GO:0006506|GPI anchor biosynthetic process|///GO:0006501|C-terminal protein lipidation|///GO:0006487|protein N-linked glycosylation|///GO:0005515|protein binding|///GO:0018279|protein N-linked glycosylation via asparagine|///GO:0044267|cellular protein metabolic process|//…			193.469	130.674	-0.566127	0.0053	0.0170748
ENSG00000000457	ENST00000367771///ENST00000367770///ENST00000423670///ENST00000470238///ENST00000367772	57147	SCYL3|SCY1-like, kinase-like 3	chr1:169662006-169894267	GO:0004672|protein kinase activity|///GO:0005524|ATP binding|///GO:0006468|protein phosphorylation|///GO:0005737|cytoplasm|///GO:0016477|cell migration|///GO:0005794|Golgi apparatus|///GO:0005515|protein binding|///GO:0030027|lamellipodium|///GO:0005488|binding|			9.72158	10.5812	0.122234	0.52445	0.689067
ENSG00000000460	ENST00000498289///ENST00000472795///ENST00000496973///ENST00000481744///ENST00000359326///ENST00000466580///ENST00000459772///ENST00000286031///ENST00000413811	55732	C1orf112|chromosome 1 open reading frame 112	chr1:169662006-169894267				19.7593	7.96185	-1.31135	5e-05	0.00026084
ENSG00000000938	ENST00000374005///ENST00000374004///ENST00000374003///ENST00000457296///ENST00000475472///ENST00000468038///ENST00000399173	2268	FGR|FGR proto-oncogene, Src family tyrosine kinase	chr1:27612063-27635277	GO:0004672|protein kinase activity|///GO:0005524|ATP binding|///GO:0006468|protein phosphorylation|///GO:0005856|cytoskeleton|///GO:0005743|mitochondrial inner membrane|///GO:0009615|response to virus|///GO:0005886|plasma membrane|///GO:0018108|peptidyl-tyrosine phosphorylation|///GO:0005829|cytosol|///GO:0030154|cell differentiation|///GO:0008360|regulation of cell shape|///GO:0004715|non-membra…			0.031566	0.0397613	0.332992	1	1
ENSG00000000971	ENST00000367429///ENST00000630130///ENST00000496761///ENST00000359637///ENST00000466229///ENST00000470918	3075	CFH|complement factor H	chr1:196651877-196747504				0	0.0725423	18.6778	1	1
ENSG00000001036	ENST00000002165///ENST00000451668///ENST00000367585	2519	FUCA2|fucosidase, alpha-L- 2, plasma	chr6:143450806-143511690				81.9083	80.632	-0.0226568	0.8505	0.914791
ENSG00000001084	ENST00000509541///ENST00000229416///ENST00000515580///ENST00000510837///ENST00000504353///ENST00000514373///ENST00000504525///ENST00000514004///ENST00000505294///ENST00000513939///ENST00000514933///ENST00000505197///ENST00000616923	2729	GCLC|glutamate-cysteine ligase, catalytic subunit	chr6:53497340-53617171	GO:0005524|ATP binding|///GO:0000287|magnesium ion binding|///GO:0006805|xenobiotic metabolic process|///GO:0045454|cell redox homeostasis|///GO:0006979|response to oxidative stress|///GO:0005829|cytosol|///GO:0043066|negative regulation of apoptotic process|///GO:0045892|negative regulation of transcription, DNA-templated|///GO:0050880|regulation of blood vessel size|///GO:0006750|glutathione bi…			64.2579	60.6015	-0.0845203	0.68	0.811602
ENSG00000001167	ENST00000341376///ENST00000353205	4800	NFYA|nuclear transcription factor Y, alpha	chr6:41026910-41099976	GO:0003677|DNA binding|///GO:0005634|nucleus|///GO:0006355|regulation of transcription, DNA-templated|///GO:0003700|transcription factor activity, sequence-specific DNA binding|///GO:0044212|transcription regulatory region DNA binding|///GO:0006366|transcription from RNA polymerase II promoter|///GO:0005654|nucleoplasm|///GO:0016602|CCAAT-binding factor complex|///GO:0045893|positive regulation o…			28.9264	22.296	-0.375601	0.0118	0.0342911
ENSG00000001460	ENST00000374409///ENST00000003583///ENST00000468303///ENST00000497384///ENST00000438866///ENST00000435187///ENST00000483261///ENST00000498488///ENST00000483528///ENST00000475760///ENST00000492753///ENST00000337248	90529	STPG1|sperm-tail PG-rich repeat containing 1	chr1:24307555-24472976				2.80239	6.26947	1.16169	0.0151	0.0421469
ENSG00000001461	ENST00000374399///ENST00000003912///ENST00000488155///ENST00000358028///ENST00000339255///ENST00000475663///ENST00000432012	57185	NIPAL3|NIPA-like domain containing 3	chr1:24307555-24472976	GO:0016021|integral component of membrane|///GO:0005515|protein binding|///GO:0015095|magnesium ion transmembrane transporter activity|///GO:0015693|magnesium ion transport|///GO:1903830|magnesium ion transmembrane transport|			3.17023	9.43677	1.57371	5e-05	0.00026084
ENSG00000001497	ENST00000374807///ENST00000374811///ENST00000374804///ENST00000484069///ENST00000469091	81887	LAS1L|LAS1-like, ribosome biogenesis factor	chrX:65512581-65534775				32.6399	19.8775	-0.715497	5e-05	0.00026084
ENSG00000001561	ENST00000321037	22875	ENPP4|ectonucleotide pyrophosphatase/phosphodiesterase 4 (putative)	chr6:46129992-46146699				4.92438	9.84973	1.00014	5e-05	0.00026084
ENSG00000001617	ENST00000414301///ENST00000450338///ENST00000413852///ENST00000002829///ENST00000426511///ENST00000434342///ENST00000420831///ENST00000493743///ENST00000470737	6405	SEMA3F|sema domain, immunoglobulin domain (Ig), short basic domain, secreted, (semaphorin) 3F	chr3:49940006-50189075				13.0943	24.934	0.92917	0.05795	0.129957
ENSG00000001626	ENST00000546407///ENST00000446805///ENST00000003084///ENST00000426809///ENST00000472848///ENST00000468795///ENST00000600166///ENST00000429014///ENST00000608965///ENST00000610149///ENST00000621535	1080	CFTR|cystic fibrosis transmembrane conductance regulator (ATP-binding cassette sub-family C, member 7)	chr7:117465783-117874139				0	0.509969	18.6778	0.10525	0.210158
ENSG00000001629	ENST00000465883///ENST00000422095///ENST00000265742///ENST00000442183///ENST00000439883///ENST00000486698///ENST00000413588	54467	ANKIB1|ankyrin repeat and IBR domain containing 1	chr7:92246233-92401384	GO:0008270|zinc ion binding|///GO:0042787|protein ubiquitination involved in ubiquitin-dependent protein catabolic process|///GO:0005737|cytoplasm|///GO:0000151|ubiquitin ligase complex|///GO:0061630|ubiquitin protein ligase activity|///GO:0032436|positive regulation of proteasomal ubiquitin-dependent protein catabolic process|///GO:0000209|protein polyubiquitination|///GO:0005515|protein binding…			64.0535	20.8257	-1.62091	5e-05	0.00026084
ENSG00000001630	ENST00000003100///ENST00000450723///ENST00000422867///ENST00000482924///ENST00000435873	1595	CYP51A1|cytochrome P450, family 51, subfamily A, polypeptide 1	chr7:92112150-92180725				137.263	48.6959	-1.49507	5e-05	0.00026084
ENSG00000001631	ENST00000486261///ENST00000340022///ENST00000475770///ENST00000412043///ENST00000394505///ENST00000394503///ENST00000487168///ENST00000445516///ENST00000458177///ENST00000433016///ENST00000454017///ENST00000440209///ENST00000430102///ENST00000470309///ENST00000413688///ENST00000458493///ENST00000452773///ENST00000425919///ENST00000444960///ENST00000422347///ENST00000425073///ENST00000466166///ENS…	889	KRIT1|KRIT1, ankyrin repeat containing	chr7:92198968-92246166				35.7488	26.196	-0.448553	0.01885	0.0508991
ENSG00000002016	ENST00000358495///ENST00000228345///ENST00000468231///ENST00000481052///ENST00000430095///ENST00000488642///ENST00000535376///ENST00000542297///ENST00000543912///ENST00000461568///ENST00000463750///ENST00000536177///ENST00000542584///ENST00000545967///ENST00000542785///ENST00000397230///ENST00000544742///ENST00000541619///ENST00000545564///ENST00000539046	5893	RAD52|RAD52 homolog, DNA repair protein	chr12:912076-1495933				11.062	5.35163	-1.04757	0.06495	0.142562
ENSG00000002079	ENST00000439784///ENST00000453194///ENST00000413734///ENST00000425880///ENST00000452010///ENST00000429079///ENST00000453378		MYH16|	chr7:99238793-99311130				0.307179	0.163698	-0.908044	0.2791	0.438126
ENSG00000002330	ENST00000394532///ENST00000309032///ENST00000544785///ENST00000394531///ENST00000493798///ENST00000492141///ENST00000544271	572	BAD|BCL2-associated agonist of cell death	chr11:64269829-64289500				3.35876	4.83096	0.524382	0.2219	0.370072
ENSG00000002549	ENST00000226299///ENST00000508497///ENST00000512397///ENST00000606142///ENST00000509583///ENST00000507960///ENST00000508014///ENST00000513105///ENST00000504614///ENST00000503467///ENST00000618908	51056	LAP3|leucine aminopeptidase 3	chr4:17577191-17614571	GO:0006508|proteolysis|///GO:0005634|nucleus|///GO:0005737|cytoplasm|///GO:0005622|intracellular|///GO:0004177|aminopeptidase activity|///GO:0005654|nucleoplasm|///GO:0070062|extracellular exosome|///GO:0005925|focal adhesion|///GO:0030145|manganese ion binding|///GO:0008235|metalloexopeptidase activity|///GO:0005739|mitochondrion|///GO:0008233|peptidase activity|///GO:0005802|trans-Golgi network|			66.8044	105.431	0.658279	5e-05	0.00026084
ENSG00000002586	ENST00000381192///ENST00000381187///ENST00000381184///ENST00000482405///ENST00000624481///ENST00000381180///ENST00000623253///ENST00000449611///ENST00000482293///ENST00000497752///ENST00000381177///ENST00000611428	4267	CD99|CD99 molecule	chrX:2691178-2741309				112.444	68.2992	-0.719267	5e-05	0.00026084
ENSG00000002587	ENST00000002596///ENST00000514690///ENST00000510712	9957	HS3ST1|heparan sulfate (glucosamine) 3-O-sulfotransferase 1	chr4:11393149-11429765	GO:0016021|integral component of membrane|///GO:0005975|carbohydrate metabolic process|///GO:0008146|sulfotransferase activity|///GO:0006024|glycosaminoglycan biosynthetic process|///GO:0044281|small molecule metabolic process|///GO:0030203|glycosaminoglycan metabolic process|///GO:0005796|Golgi lumen|///GO:0008467|[heparan sulfate]-glucosamine 3-sulfotransferase 1 activity|			0.0047545	0.0329624	2.79346	1	1
ENSG00000002726	ENST00000493429///ENST00000467291///ENST00000460213///ENST00000360937///ENST00000416793///ENST00000483043///ENST00000480582///ENST00000619575///ENST00000622116	26	AOC1|amine oxidase, copper containing 1	chr7:150824626-150861504				0.0109773	1.08143	6.62227	0.23	0.380062
ENSG00000002745	ENST00000361301///ENST00000222462	51384	WNT16|wingless-type MMTV integration site family, member 16	chr7:121325366-121341104				0.0345457	0.0126006	-1.45501	1	1
ENSG00000002746	ENST00000395891///ENST00000490954///ENST00000453890///ENST00000492310///ENST00000471527///ENST00000493057///ENST00000464944///ENST00000481031///ENST00000471043///ENST00000461842///ENST00000429529	23072	HECW1|HECT, C2 and WW domain containing E3 ubiquitin protein ligase 1	chr7:42954134-43566001				0.00295361	0.00646182	1.12946	1	1
ENSG00000002822	ENST00000481633///ENST00000402746///ENST00000399654///ENST00000406869///ENST00000468372///ENST00000496548///ENST00000477172///ENST00000450235///ENST00000437877///ENST00000438959///ENST00000444373///ENST00000421113///ENST00000483165///ENST00000491858///ENST00000464742///ENST00000459731///ENST00000486340///ENST00000469871///ENST00000445959///ENST00000429625///ENST00000455998///ENST00000429779///ENS…	8379	MAD1L1|MAD1 mitotic arrest deficient-like 1 (yeast)	chr7:1815792-2233243				20.8042	21.5026	0.0476341	0.7895	0.880104
ENSG00000002834	ENST00000318008///ENST00000585841///ENST00000584106///ENST00000443937///ENST00000419929///ENST00000581485///ENST00000579123///ENST00000433206///ENST00000435347	3927	LASP1|LIM and SH3 protein 1	chr17:38869858-38921770				40.1377	136.82	1.76925	5e-05	0.00026084
ENSG00000002919	ENST00000581298///ENST00000578861///ENST00000580219///ENST00000452859///ENST00000393405///ENST00000580875///ENST00000581705///ENST00000359238///ENST00000583320///ENST00000582104///ENST00000584335///ENST00000582481///ENST00000577310	29916	SNX11|sorting nexin 11	chr17:48103356-48123074	GO:0005622|intracellular|///GO:0006886|intracellular protein transport|///GO:0006897|endocytosis|///GO:0035091|phosphatidylinositol binding|///GO:0019898|extrinsic component of membrane|///GO:0005768|endosome|///GO:0016050|vesicle organization|///GO:0005515|protein binding|///GO:1901981|phosphatidylinositol phosphate binding|			27.8764	17.0324	-0.710759	5e-05	0.00026084
ENSG00000002933	ENST00000484928///ENST00000004103///ENST00000494349///ENST00000475710///ENST00000461345///ENST00000475536///ENST00000468689///ENST00000462826///ENST00000475007///ENST00000481305///ENST00000474166	55365	TMEM176A|transmembrane protein 176A	chr7:150791284-150805120				0	0.101711	18.6778	1	1
ENSG00000003056	ENST00000539143///ENST00000541507///ENST00000000412///ENST00000544193///ENST00000543704///ENST00000537621///ENST00000543258///ENST00000543834///ENST00000544245///ENST00000540837///ENST00000543845///ENST00000543159///ENST00000536844	4074	M6PR|mannose-6-phosphate receptor (cation dependent)	chr12:8681599-8949955				194.055	95.0994	-1.02896	5e-05	0.00026084
ENSG00000003096	ENST00000371882///ENST00000371876///ENST00000371878///ENST00000447671///ENST00000469946///ENST00000453826///ENST00000545703///ENST00000539496///ENST00000262820///ENST00000540167///ENST00000541812	90293	KLHL13|kelch-like family member 13	chrX:117897812-118117340				2.57311	5.79555	1.17143	5e-05	0.00026084
ENSG00000003137	ENST00000001146///ENST00000412253///ENST00000474509///ENST00000461519///ENST00000546307	56603	CYP26B1|cytochrome P450, family 26, subfamily B, polypeptide 1	chr2:72129237-72148038				0.963134	0.959946	-0.00478403	0.98535	0.989887
ENSG00000003147	ENST00000402384///ENST00000265577///ENST00000396675///ENST00000455539///ENST00000339809///ENST00000401396///ENST00000486677///ENST00000470696///ENST00000407906///ENST00000317367///ENST00000490041///ENST00000447326///ENST00000476942///ENST00000430867///ENST00000457755///ENST00000446305///ENST00000406470///ENST00000422063	3382	ICA1|islet cell autoantigen 1, 69kDa	chr7:8113183-8344516				45.9056	78.5315	0.774602	5e-05	0.00026084
ENSG00000003249	ENST00000304733///ENST00000002501///ENST00000623401///ENST00000392973///ENST00000568838///ENST00000568662///ENST00000568330	79007	DBNDD1|dysbindin (dystrobrevin binding protein 1) domain containing 1	chr16:90004864-90047773	GO:0005737|cytoplasm|			30.4054	45.9235	0.594905	0.0001	0.000496109
ENSG00000003393	ENST00000264276///ENST00000439495///ENST00000489440///ENST00000482891///ENST00000494017///ENST00000483703///ENST00000482789///ENST00000467448///ENST00000496244///ENST00000409632///ENST00000410052///ENST00000462747	57679	ALS2|amyotrophic lateral sclerosis 2 (juvenile)	chr2:201700553-201781189				13.1633	10.3098	-0.352506	0.089	0.183804
ENSG00000003400	ENST00000286186///ENST00000460140///ENST00000272879///ENST00000438843///ENST00000374650///ENST00000346817///ENST00000313728///ENST00000448480///ENST00000484926///ENST00000492363///ENST00000471191///ENST00000485408///ENST00000360132	843	CASP10|caspase 10, apoptosis-related cysteine peptidase	chr2:201182880-201229406				0.436767	0.565781	0.37338	0.4438	0.614907
ENSG00000003402	ENST00000309955///ENST00000443227///ENST00000341222///ENST00000341582///ENST00000342795///ENST00000395148///ENST00000441224///ENST00000433445///ENST00000423241///ENST00000490965///ENST00000439154///ENST00000425030///ENST00000417748///ENST00000440180///ENST00000461820///ENST00000457277///ENST00000461422///ENST00000494258///ENST00000470178///ENST00000462763///ENST00000479953///ENST00000460961///ENS…	8837	CFLAR|CASP8 and FADD-like apoptosis regulator	chr2:201116103-201176687				41.8732	30.3411	-0.464755	0.0571	0.128403
ENSG00000003436	ENST00000392365///ENST00000426055///ENST00000481132///ENST00000435414///ENST00000409676///ENST00000339091///ENST00000481389///ENST00000437725///ENST00000421427///ENST00000453013///ENST00000417013///ENST00000420747///ENST00000233156	7035	TFPI|tissue factor pathway inhibitor (lipoprotein-associated coagulation inhibitor)	chr2:187001875-187565760				53.7247	2.18138	-4.62227	5e-05	0.00026084
ENSG00000003509	ENST00000455230///ENST00000474154///ENST00000002125///ENST00000336237///ENST00000431821///ENST00000416653///ENST00000469831///ENST00000483999///ENST00000439218///ENST00000432075///ENST00000474257///ENST00000419278///ENST00000441905	55471	NDUFAF7|NADH dehydrogenase (ubiquinone) complex I, assembly factor 7	chr2:37167819-37324808				22.1377	18.5584	-0.254431	0.5769	0.734107
ENSG00000003756	ENST00000347869///ENST00000469838///ENST00000404526///ENST00000441305///ENST00000433556///ENST00000438369///ENST00000464087///ENST00000492472///ENST00000437500///ENST00000417905///ENST00000395174///ENST00000496179///ENST00000462025///ENST00000471995///ENST00000474818///ENST00000494360///ENST00000441812///ENST00000489437///ENST00000474470///ENST00000475128///ENST00000493993///ENST00000475590///ENS…	10181	RBM5|RNA binding motif protein 5	chr3:49940006-50189075				80.6872	79.4308	-0.0226398	0.949	0.96808
ENSG00000003987	ENST00000180173///ENST00000521857///ENST00000519590///ENST00000519763///ENST00000517317///ENST00000519122///ENST00000518272///ENST00000523571///ENST00000521177	9108	MTMR7|myotubularin related protein 7	chr8:17224963-17413528				1.46759	1.64493	0.164571	0.76535	0.86684
ENSG00000003989	ENST00000494857///ENST00000522656///ENST00000470360///ENST00000004531///ENST00000398090	6542	SLC7A2|solute carrier family 7 (cationic amino acid transporter, y+ system), member 2	chr8:17497087-17570573				97.9289	55.8543	-0.810065	5e-05	0.00026084
ENSG00000004059	ENST00000000233///ENST00000463733///ENST00000415666///ENST00000467281///ENST00000489673///ENST00000459680	381	ARF5|ADP-ribosylation factor 5	chr7:127580617-127602144				161.792	251.501	0.636428	5e-05	0.00026084
ENSG00000004139	ENST00000379061///ENST00000585482///ENST00000585453///ENST00000582323///ENST00000578128///ENST00000577870///ENST00000580711///ENST00000579593	23098	SARM1|sterile alpha and TIR motif containing 1	chr17:28357580-28407197				3.52537	1.89225	-0.897672	0.4436	0.61476
ENSG00000004142	ENST00000540200///ENST00000618887	26073	POLDIP2|polymerase (DNA-directed), delta interacting protein 2	chr17:28347176-28357522	GO:0003677|DNA binding|///GO:0005634|nucleus|///GO:0005739|mitochondrion|///GO:0005515|protein binding|///GO:0042645|mitochondrial nucleoid|///GO:0070584|mitochondrion morphogenesis|			78.1407	60.8968	-0.359708	0.00175	0.00649584
ENSG00000004399	ENST00000324093///ENST00000501038///ENST00000504689///ENST00000504524///ENST00000512744///ENST00000506979///ENST00000508630///ENST00000512807///ENST00000504979///ENST00000503166///ENST00000514990///ENST00000504767///ENST00000511018///ENST00000515191///ENST00000505505///ENST00000505665///ENST00000505237	23129	PLXND1|plexin D1	chr3:129555174-129606818				89.0023	46.329	-0.941925	5e-05	0.00026084
ENSG00000004455	ENST00000373449///ENST00000548033///ENST00000482191///ENST00000491241///ENST00000467905///ENST00000480134///ENST00000354858///ENST00000550338///ENST00000469238///ENST00000466029///ENST00000487289///ENST00000548559///ENST00000551979///ENST00000629371///ENST00000626911	204	AK2|adenylate kinase 2	chr1:32986951-33080996				148.589	121.587	-0.289339	0.03855	0.0926294
ENSG00000004468	ENST00000502843///ENST00000226279///ENST00000506191///ENST00000511430///ENST00000510674	952	CD38|CD38 molecule	chr4:15778274-15853230				0.00600475	0.00523683	-0.197411	1	1
ENSG00000004478	ENST00000001008///ENST00000543769///ENST00000540260///ENST00000538622///ENST00000543037///ENST00000539181///ENST00000544366///ENST00000630279	2288	FKBP4|FK506 binding protein 4, 59kDa	chr12:2794952-2941140				274.132	191.654	-0.516365	0.01075	0.0316757
ENSG00000004487	ENST00000356634///ENST00000400181///ENST00000481879///ENST00000465864///ENST00000494920///ENST00000602503	23028	KDM1A|lysine (K)-specific demethylase 1A	chr1:23019447-23177808				92.5688	81.2104	-0.188861	0.31365	0.478839
ENSG00000004534	ENST00000442092///ENST00000266022///ENST00000443081///ENST00000419610///ENST00000441115///ENST00000493652///ENST00000422955///ENST00000454079///ENST00000425608///ENST00000434592///ENST00000433811///ENST00000491874///ENST00000488807///ENST00000464013///ENST00000483350///ENST00000446471///ENST00000466247///ENST00000478026///ENST00000438912///ENST00000421682	10180	RBM6|RNA binding motif protein 6	chr3:49940006-50189075				62.0806	109.652	0.820718	0.00635	0.0199566
ENSG00000004660	ENST00000381769///ENST00000348335///ENST00000158166///ENST00000573483	84254	CAMKK1|calcium/calmodulin-dependent protein kinase kinase 1, alpha	chr17:3860314-3894891	GO:0004672|protein kinase activity|///GO:0005524|ATP binding|///GO:0006468|protein phosphorylation|///GO:0004674|protein serine/threonine kinase activity|///GO:0005634|nucleus|///GO:0005829|cytosol|///GO:0007268|synaptic transmission|///GO:0004683|calmodulin-dependent protein kinase activity|///GO:0005515|protein binding|///GO:0005516|calmodulin binding|///GO:0032147|activation of protein kinase …			1.0677	1.4229	0.414329	0.015	0.0419035
ENSG00000004700	ENST00000444129///ENST00000421138///ENST00000396093///ENST00000314748///ENST00000542432///ENST00000536240///ENST00000536964///ENST00000539672	5965	RECQL|RecQ helicase-like	chr12:21437614-21501669				25.6869	9.71191	-1.4032	5e-05	0.00026084
ENSG00000004766	ENST00000251739///ENST00000305866///ENST00000438395///ENST00000441602///ENST00000458530///ENST00000485994///ENST00000436177///ENST00000477935///ENST00000476413///ENST00000471188///ENST00000495039///ENST00000458707///ENST00000484954///ENST00000485140///ENST00000477572///ENST00000467326///ENST00000480943///ENST00000474412///ENST00000443443///ENST00000544910	55610	VPS50|VPS50 EARP/GARPII complex subunit	chr7:93232339-93361121				22.6517	13.6988	-0.725574	0.00805	0.0246407
ENSG00000004776	ENST00000592984///ENST00000587965///ENST00000004982	126393	HSPB6|heat shock protein, alpha-crystallin-related, B6	chr19:35754565-35758079				0.0943869	0.0974271	0.045737	1	1
ENSG00000004777	ENST00000589133///ENST00000378944///ENST00000590893///ENST00000314737///ENST00000221905///ENST00000601474///ENST00000588248///ENST00000591438///ENST00000586918///ENST00000587447///ENST00000593034///ENST00000587984///ENST00000007510	115703	ARHGAP33|Rho GTPase activating protein 33	chr19:35774531-35788822				4.00685	2.21653	-0.854165	0.02415	0.0625689
ENSG00000004779	ENST00000007516///ENST00000562133///ENST00000484769///ENST00000570319///ENST00000567761	4706	NDUFAB1|NADH dehydrogenase (ubiquinone) 1, alpha/beta subcomplex, 1, 8kDa	chr16:23581001-23596356				324.07	305.968	-0.0829266	0.49455	0.662323
ENSG00000004799	ENST00000005178///ENST00000473796///ENST00000468445///ENST00000498190///ENST00000473301	5166	PDK4|pyruvate dehydrogenase kinase, isozyme 4	chr7:95583498-95596491	GO:0004672|protein kinase activity|///GO:0005524|ATP binding|///GO:0006468|protein phosphorylation|///GO:0005739|mitochondrion|///GO:0006885|regulation of pH|///GO:0042594|response to starvation|///GO:0005759|mitochondrial matrix|///GO:0044237|cellular metabolic process|///GO:0044281|small molecule metabolic process|///GO:0008286|insulin receptor signaling pathway|///GO:0006006|glucose metabolic …			1.14823	3.22617	1.49041	5e-05	0.00026084
ENSG00000004809	ENST00000460159///ENST00000451557///ENST00000368919///ENST00000434949///ENST00000437378///ENST00000424139///ENST00000461487///ENST00000330550	85413	SLC22A16|solute carrier family 22 (organic cation/carnitine transporter), member 16	chr6:110424686-110476641	GO:0016021|integral component of membrane|///GO:0055085|transmembrane transport|///GO:0022857|transmembrane transporter activity|///GO:0005886|plasma membrane|///GO:0030154|cell differentiation|///GO:0005887|integral component of plasma membrane|///GO:0007275|multicellular organismal development|///GO:0007283|spermatogenesis|///GO:0030317|sperm motility|///GO:0007338|single fertilization|///GO:00…			0.0119193	0.0190114	0.673563	1	1
ENSG00000004838	ENST00000490675///ENST00000231749///ENST00000360165///ENST00000475688///ENST00000442887///ENST00000443080///ENST00000478269///ENST00000431869///ENST00000468182	51364	ZMYND10|zinc finger, MYND-type containing 10	chr3:50341105-50346852				0.718435	1.59067	1.1467	0.001	0.00398539
ENSG00000004846	ENST00000404938///ENST00000477094///ENST00000443026///ENST00000406935///ENST00000258738///ENST00000441315	340273	ABCB5|ATP-binding cassette, sub-family B (MDR/TAP), member 5	chr7:20615206-20777038				0.00462868	0.00624664	0.432481	1	1
ENSG00000004848	ENST00000379044	170302	ARX|aristaless related homeobox	chrX:25003693-25015948				0.191968	0.752166	1.97019	5e-05	0.00026084
ENSG00000004864	ENST00000265631///ENST00000494085///ENST00000490072///ENST00000484495///ENST00000492869///ENST00000472162///ENST00000487710///ENST00000416240	10165	SLC25A13|solute carrier family 25 (aspartate/glutamate carrier), member 13	chr7:96120219-96322147	GO:0005509|calcium ion binding|///GO:0005739|mitochondrion|///GO:0005215|transporter activity|///GO:0006810|transport|///GO:0005743|mitochondrial inner membrane|///GO:0005975|carbohydrate metabolic process|///GO:0005887|integral component of plasma membrane|///GO:0006094|gluconeogenesis|///GO:0044281|small molecule metabolic process|///GO:0006006|glucose metabolic process|///GO:0005313|L-glutamat…			28.966	21.8527	-0.406549	0.0707	0.152657
ENSG00000004866	ENST00000393446///ENST00000265437///ENST00000393451///ENST00000438863///ENST00000323984///ENST00000393449///ENST00000443979///ENST00000417919///ENST00000446490///ENST00000421345///ENST00000432298///ENST00000422922///ENST00000449366///ENST00000487459///ENST00000434836///ENST00000467538///ENST00000393443///ENST00000465133///ENST00000477742///ENST00000462544///ENST00000393447///ENST00000393444///ENS…	7982///93655	ST7|suppression of tumorigenicity 7///ST7|ST7 overlapping transcript 3	chr7:116952445-117230103				14.1252	15.6989	0.152391	0.4204	0.593158
ENSG00000004897	ENST00000066544///ENST00000531206///ENST00000570740///ENST00000533415///ENST00000571643///ENST00000527547///ENST00000526866///ENST00000573502///ENST00000525495///ENST00000574304///ENST00000575830///ENST00000576484///ENST00000573550///ENST00000570818///ENST00000575483///ENST00000532893///ENST00000528748///ENST00000532575///ENST00000528147	996	CDC27|cell division cycle 27	chr17:47117702-47189422				109.548	50.8321	-1.10775	5e-05	0.00026084
ENSG00000004939	ENST00000262418///ENST00000497360///ENST00000471005///ENST00000498270///ENST00000399246///ENST00000631130	6521	SLC4A1|solute carrier family 4 (anion exchanger), member 1 (Diego blood group)	chr17:44248384-44268141				0.00477243	0.139438	4.86875	1	1
ENSG00000004948	ENST00000421592///ENST00000394441///ENST00000426151///ENST00000423724///ENST00000415529///ENST00000359558///ENST00000360249	799	CALCR|calcitonin receptor	chr7:93424486-93574730	GO:0016021|integral component of membrane|///GO:0007186|G-protein coupled receptor signaling pathway|///GO:0016020|membrane|///GO:0004930|G-protein coupled receptor activity|///GO:0004888|transmembrane signaling receptor activity|///GO:0007166|cell surface receptor signaling pathway|///GO:0004948|calcitonin receptor activity|///GO:0015031|protein transport|///GO:0005886|plasma membrane|///GO:0005…			21.8598	12.4291	-0.814558	5e-05	0.00026084
ENSG00000004961	ENST00000321143///ENST00000380763///ENST00000380762	3052	HCCS|holocytochrome c synthase	chrX:11111300-11123078	GO:0046872|metal ion binding|///GO:0005739|mitochondrion|///GO:0005743|mitochondrial inner membrane|///GO:0055114|oxidation-reduction process|///GO:0009887|organ morphogenesis|///GO:0004408|holocytochrome-c synthase activity|///GO:0005515|protein binding|			32.6011	32.7345	0.00588964	0.96565	0.977952
ENSG00000004975	ENST00000005340///ENST00000575458///ENST00000575086///ENST00000576840///ENST00000571745///ENST00000576285///ENST00000573354///ENST00000575756///ENST00000574143///ENST00000574591///ENST00000577154///ENST00000574642///ENST00000572285///ENST00000576439///ENST00000576949	1856	DVL2|dishevelled segment polarity protein 2	chr17:7225340-7234545	GO:0005634|nucleus|///GO:0005737|cytoplasm|///GO:0007264|small GTPase mediated signal transduction|///GO:0035556|intracellular signal transduction|///GO:0005886|plasma membrane|///GO:0005829|cytosol|///GO:0016055|Wnt signaling pathway|///GO:0060070|canonical Wnt signaling pathway|///GO:0006366|transcription from RNA polymerase II promoter|///GO:0090179|planar cell polarity pathway involved in neu…			15.7474	11.4853	-0.455318	0.09295	0.19034
ENSG00000005001	ENST00000161006///ENST00000571228///ENST00000575164///ENST00000576381///ENST00000572061///ENST00000574768///ENST00000577177///ENST00000570950	64063	PRSS22|protease, serine, 22	chr16:2852726-2859726	GO:0006508|proteolysis|///GO:0005576|extracellular region|///GO:0004252|serine-type endopeptidase activity|			7.58853	39.1585	2.36743	5e-05	0.00026084
ENSG00000005007	ENST00000262803///ENST00000599848///ENST00000601981///ENST00000594504///ENST00000600012///ENST00000600868///ENST00000598209///ENST00000600310///ENST00000598471///ENST00000601689///ENST00000594243///ENST00000596842///ENST00000600689	5976	UPF1|UPF1 regulator of nonsense transcripts homolog (yeast)	chr19:18831937-18868236				65.8151	36.284	-0.859085	0.00055	0.00234422
ENSG00000005020	ENST00000345317///ENST00000489977///ENST00000468712///ENST00000495802///ENST00000432747///ENST00000490456///ENST00000497511///ENST00000481204///ENST00000487720	8935	SKAP2|src kinase associated phosphoprotein 2	chr7:26667061-26995239				29.0431	14.0624	-1.04636	5e-05	0.00026084
ENSG00000005022	ENST00000317881///ENST00000475354///ENST00000460013///ENST00000463551	292	SLC25A5|solute carrier family 25 (mitochondrial carrier; adenine nucleotide translocator), member 5	chrX:119466033-119471319				1422.09	506.351	-1.4898	5e-05	0.00026084
ENSG00000005059	ENST00000394650///ENST00000472310///ENST00000515114///ENST00000452915///ENST00000494604	55013	CCDC109B|coiled-coil domain containing 109B	chr4:109560204-109703583				19.9723	6.68957	-1.57801	5e-05	0.00026084
ENSG00000005073	ENST00000517402///ENST00000006015	3207	HOXA11|homeobox A11	chr7:27181509-27193448				0.0779051	0.444176	2.51134	0.0027	0.00952177
ENSG00000005075	ENST00000292614///ENST00000393794	5439	POLR2J|polymerase (RNA) II (DNA directed) polypeptide J, 13.3kDa	chr7:102464928-102478907				19.5567	16.1255	-0.278324	0.11245	0.221471
ENSG00000005100	ENST00000574023///ENST00000572490///ENST00000433302///ENST00000575153///ENST00000225296	56919	DHX33|DEAH (Asp-Glu-Ala-His) box polypeptide 33	chr17:5282264-5469060				9.12142	6.54351	-0.479194	0.1701	0.303976
ENSG00000005102	ENST00000318579///ENST00000549132///ENST00000393661///ENST00000329168	4222	MEOX1|mesenchyme homeobox 1	chr17:43640387-43661954				0	0.00988747	18.6778	1	1
ENSG00000005108	ENST00000423059///ENST00000408005///ENST00000497575///ENST00000480061///ENST00000617773	221981	THSD7A|thrombospondin, type I, domain containing 7A	chr7:11180901-11832198				0.000928948	0.0256417	4.78675	1	1
ENSG00000005156	ENST00000378526///ENST00000585941///ENST00000262327///ENST00000592690///ENST00000585740///ENST00000590181///ENST00000586407///ENST00000588109///ENST00000586435///ENST00000590630///ENST00000586058///ENST00000588713///ENST00000593099///ENST00000586119///ENST00000585370///ENST00000592244	3980	LIG3|ligase III, DNA, ATP-dependent	chr17:34927858-35121522				50.3012	41.008	-0.294688	0.63035	0.775584
ENSG00000005175	ENST00000005386///ENST00000548211///ENST00000432584///ENST00000380650///ENST00000548296///ENST00000547706///ENST00000551293	79657	RPAP3|RNA polymerase II associated protein 3	chr12:47661248-47706061				66.5298	52.7069	-0.336009	0.0657	0.14387
ENSG00000005187	ENST00000568235///ENST00000501740///ENST00000614721///ENST00000561584///ENST00000564701///ENST00000289416///ENST00000440284///ENST00000561795///ENST00000562251///ENST00000563914///ENST00000567387///ENST00000561499///ENST00000569141///ENST00000567711///ENST00000567006	6296	ACSM3|acyl-CoA synthetase medium-chain family member 3	chr16:20610242-20925006				0.884473	1.9236	1.12092	0.1091	0.216305
ENSG00000005189	ENST00000568894///ENST00000568046///ENST00000566993///ENST00000261377///ENST00000348433///ENST00000568501///ENST00000566276///ENST00000568476///ENST00000565340///ENST00000568647///ENST00000566518///ENST00000564274///ENST00000563068///ENST00000567297///ENST00000563617///ENST00000564200///ENST00000563045///ENST00000561474///ENST00000568334	81691	|exonuclease NEF-sp	chr16:20610242-20925006				22.3163	15.2746	-0.546962	0.16635	0.29929
ENSG00000005194	ENST00000394391///ENST00000567518///ENST00000565961///ENST00000569370///ENST00000568940///ENST00000569979///ENST00000570000///ENST00000564885///ENST00000567751///ENST00000565786///ENST00000569246///ENST00000565368///ENST00000563561///ENST00000566284///ENST00000563341	57019	CIAPIN1|cytokine induced apoptosis inhibitor 1	chr16:57428168-57487327				91.9172	69.3639	-0.406148	0.24805	0.402073
ENSG00000005206	ENST00000585725///ENST00000613503///ENST00000586332///ENST00000621568///ENST00000614794///ENST00000610743///ENST00000618220///ENST00000586111///ENST00000587851///ENST00000593243///ENST00000622308///ENST00000612623///ENST00000614784///ENST00000589515	56928	SPPL2B|signal peptide peptidase like 2B	chr19:2252251-2354806				4.69963	5.36987	0.19234	0.6881	0.816802
ENSG00000005238	ENST00000378566///ENST00000603301///ENST00000488109///ENST00000322813///ENST00000605244///ENST00000378561///ENST00000378557///ENST00000605104///ENST00000605392	80256	FAM214B|family with sequence similarity 214, member B	chr9:35104111-35116341				1.53078	4.47664	1.54815	5e-05	0.00026084
ENSG00000005243	ENST00000580409///ENST00000583414///ENST00000581637///ENST00000581756///ENST00000585182///ENST00000621465///ENST00000584955///ENST00000612370///ENST00000579263///ENST00000580174	51226	COPZ2|coatomer protein complex, subunit zeta 2	chr17:48026166-48038030				2.23451	14.1448	2.66224	5e-05	0.00026084
ENSG00000005249	ENST00000265717///ENST00000393613///ENST00000488792	5577	PRKAR2B|protein kinase, cAMP-dependent, regulatory, type II, beta	chr7:107044648-107161811				5.28559	5.91883	0.163248	0.44505	0.616117
ENSG00000005302	ENST00000312196///ENST00000337339///ENST00000468149///ENST00000476743///ENST00000421368///ENST00000380693///ENST00000380692///ENST00000478462///ENST00000482871///ENST00000473806///ENST00000483645///ENST00000494268///ENST00000380691///ENST00000467141///ENST00000473380///ENST00000361672///ENST00000398527	10943	MSL3|male-specific lethal 3 homolog (Drosophila)	chrX:11758158-11775753	GO:0003677|DNA binding|///GO:0006351|transcription, DNA-templated|///GO:0035064|methylated histone binding|///GO:0006338|chromatin remodeling|///GO:0005654|nucleoplasm|///GO:0006325|chromatin organization|///GO:0016575|histone deacetylation|///GO:0006342|chromatin silencing|///GO:0035267|NuA4 histone acetyltransferase complex|///GO:0043984|histone H4-K16 acetylation|///GO:0072487|MSL complex|///G…			12.8537	14.566	0.180423	0.3541	0.52413
ENSG00000005339	ENST00000262367///ENST00000382070///ENST00000571763///ENST00000576720///ENST00000570939///ENST00000574740///ENST00000573517///ENST00000572569///ENST00000573672///ENST00000571826///ENST00000572134///ENST00000575237///ENST00000634839	1387	CREBBP|CREB binding protein	chr16:3725053-3880726				68.9605	49.6494	-0.473995	0.04285	0.101118
ENSG00000005379	ENST00000581692///ENST00000581675///ENST00000268893///ENST00000578511///ENST00000343736///ENST00000577871///ENST00000580669///ENST00000582679///ENST00000578486///ENST00000585149///ENST00000583624	9256	BZRAP1|benzodiazepine receptor (peripheral) associated protein 1	chr17:58301227-58417595				0.00768182	0.0235274	1.61482	1	1
ENSG00000005381	ENST00000225275///ENST00000577220///ENST00000578493///ENST00000581022///ENST00000580005	4353	MPO|myeloperoxidase	chr17:58269855-58280935				0	0.00311743	18.6778	1	1
ENSG00000005421	ENST00000222381///ENST00000462594///ENST00000433729///ENST00000470502	5444	PON1|paraoxonase 1	chr7:95297675-95324707				0	0.0118791	18.6778	1	1
ENSG00000005436	ENST00000470285///ENST00000470197///ENST00000321027///ENST00000492826///ENST00000409857///ENST00000427862///ENST00000472230///ENST00000486016///ENST00000442309///ENST00000470503///ENST00000541687	6936	GCFC2|GC-rich sequence DNA-binding factor 2	chr2:75646782-75710989				10.9442	10.2403	-0.0959061	0.83755	0.907173
ENSG00000005448	ENST00000461531///ENST00000409791///ENST00000475328///ENST00000469932///ENST00000493982///ENST00000426787///ENST00000348227///ENST00000465134///ENST00000480089///ENST00000482880///ENST00000468778///ENST00000469321///ENST00000482605	84058	WDR54|WD repeat domain 54	chr2:74421677-74425755				41.3369	50.8387	0.298497	0.0307	0.0766856
ENSG00000005469	ENST00000419147///ENST00000412227///ENST00000331536///ENST00000442291///ENST00000488850///ENST00000469785///ENST00000479014	54677	CROT|carnitine O-octanoyltransferase	chr7:87345680-87399795				15.1276	15.0954	-0.00307837	0.9868	0.990887
ENSG00000005471	ENST00000440025///ENST00000359206///ENST00000265723///ENST00000453593///ENST00000467983///ENST00000467079///ENST00000469770///ENST00000473795///ENST00000417608///ENST00000358400	5244	ABCB4|ATP-binding cassette, sub-family B (MDR/TAP), member 4	chr7:87401696-87480435				0.182883	0.564881	1.62702	0.00165	0.00615958
ENSG00000005483	ENST00000311117///ENST00000334884///ENST00000478990///ENST00000480368///ENST00000495267///ENST00000476671///ENST00000474203///ENST00000482560///ENST00000485619///ENST00000468607///ENST00000496191///ENST00000479838///ENST00000478079///ENST00000473063///ENST00000257745///ENST00000334914///ENST00000622386	55904	KMT2E|lysine (K)-specific methyltransferase 2E	chr7:105013424-105399308				35.2216	17.5436	-1.00552	0.0004	0.00175048
ENSG00000005486	ENST00000466232///ENST00000468644///ENST00000006777///ENST00000454791///ENST00000476218///ENST00000468304///ENST00000428119///ENST00000467406///ENST00000318622	57414	RHBDD2|rhomboid domain containing 2	chr7:75842601-75888926	GO:0006508|proteolysis|///GO:0016021|integral component of membrane|///GO:0005634|nucleus|///GO:0004252|serine-type endopeptidase activity|///GO:0005654|nucleoplasm|///GO:0005794|Golgi apparatus|///GO:0048471|perinuclear region of cytoplasm|///GO:0000139|Golgi membrane|			49.9577	84.6626	0.76102	5e-05	0.00026084
ENSG00000005513	ENST00000293894///ENST00000566034	30812	SOX8|SRY (sex determining region Y)-box 8	chr16:981807-986979				0.026151	0.693784	4.72955	0.0003	0.00135017
ENSG00000005700	ENST00000306270///ENST00000505222///ENST00000508381///ENST00000445419///ENST00000503400///ENST00000503631///ENST00000510291///ENST00000471036///ENST00000369751///ENST00000610980	25998	IBTK|inhibitor of Bruton agammaglobulinemia tyrosine kinase	chr6:82169982-82247754	GO:0005737|cytoplasm|///GO:0016020|membrane|///GO:0005654|nucleoplasm|///GO:0019901|protein kinase binding|///GO:0005515|protein binding|///GO:0061099|negative regulation of protein tyrosine kinase activity|///GO:0001933|negative regulation of protein phosphorylation|///GO:0051209|release of sequestered calcium ion into cytosol|///GO:0030292|protein tyrosine kinase inhibitor activity|			33.3688	38.1843	0.194482	0.2144	0.36106
ENSG00000005801	ENST00000528796///ENST00000354599///ENST00000399602///ENST00000429541///ENST00000005082///ENST00000526601///ENST00000438262///ENST00000528410///ENST00000528218///ENST00000529789///ENST00000525313///ENST00000533036///ENST00000529228///ENST00000526540///ENST00000529678///ENST00000526598///ENST00000528636///ENST00000427810///ENST00000534569///ENST00000524857///ENST00000530643///ENST00000330692///ENS…	7748	ZNF195|zinc finger protein 195	chr11:3336720-3379222				18.4446	18.2363	-0.0163834	0.91745	0.94956
ENSG00000005810	ENST00000544440///ENST00000429715///ENST00000485061///ENST00000482517///ENST00000462987///ENST00000498073///ENST00000466564///ENST00000486679///ENST00000474882///ENST00000491491///ENST00000357337///ENST00000612956	23077	MYCBP2|MYC binding protein 2, E3 ubiquitin protein ligase	chr13:77044654-77327050				7.03275	11.8334	0.750704	0.01555	0.0432309
ENSG00000005812	ENST00000485797///ENST00000477982///ENST00000355619///ENST00000417323///ENST00000470210///ENST00000472949	26224	FBXL3|F-box and leucine-rich repeat protein 3	chr13:76990659-77027195				16.0973	12.7213	-0.339576	0.02075	0.0552321
ENSG00000005844	ENST00000356798///ENST00000562652///ENST00000569570///ENST00000358164///ENST00000568926///ENST00000565864///ENST00000562857///ENST00000565348///ENST00000564118///ENST00000433423///ENST00000569725///ENST00000566149///ENST00000568012///ENST00000564935///ENST00000568987///ENST00000563615///ENST00000562020///ENST00000566267///ENST00000564632	3683	ITGAL|integrin, alpha L (antigen CD11A (p180), lymphocyte function-associated antigen 1; alpha polypeptide)	chr16:30472657-30523185				0.551786	1.18931	1.10795	0.00685	0.0213401
ENSG00000005882	ENST00000007708///ENST00000508030///ENST00000503176///ENST00000503614///ENST00000508960///ENST00000505897///ENST00000505440///ENST00000511026///ENST00000512238///ENST00000515040///ENST00000510219///ENST00000506242///ENST00000503076///ENST00000512204///ENST00000506647///ENST00000614357	5164	PDK2|pyruvate dehydrogenase kinase, isozyme 2	chr17:50094736-50129882				16.021	10.3755	-0.626782	0.001	0.00398539
ENSG00000005884	ENST00000506401///ENST00000505306///ENST00000320031///ENST00000007722///ENST00000508100///ENST00000570989///ENST00000512553///ENST00000505552///ENST00000510809///ENST00000505612///ENST00000506827///ENST00000507771///ENST00000515147///ENST00000504417///ENST00000506437///ENST00000514834	3675	ITGA3|integrin, alpha 3 (antigen CD49C, alpha 3 subunit of VLA-3 receptor)	chr17:50055967-50090481	GO:0016021|integral component of membrane|///GO:0007155|cell adhesion|///GO:0007229|integrin-mediated signaling pathway|///GO:0046872|metal ion binding|///GO:0046982|protein heterodimerization activity|///GO:0005886|plasma membrane|///GO:0007160|cell-matrix adhesion|///GO:0008305|integrin complex|///GO:0030111|regulation of Wnt signaling pathway|///GO:0005515|protein binding|///GO:0070062|extrace…			49.8489	33.9726	-0.553191	0.04795	0.111031
ENSG00000005889	ENST00000497813///ENST00000428571///ENST00000419690///ENST00000379177///ENST00000304543///ENST00000459724///ENST00000480195///ENST00000338565///ENST00000474385///ENST00000539115///ENST00000379188	7543	ZFX|zinc finger protein, X-linked	chrX:24146224-24216255	GO:0003677|DNA binding|///GO:0046872|metal ion binding|///GO:0005634|nucleus|///GO:0006355|regulation of transcription, DNA-templated|///GO:0003700|transcription factor activity, sequence-specific DNA binding|///GO:0006351|transcription, DNA-templated|///GO:0003713|transcription coactivator activity|///GO:0005654|nucleoplasm|///GO:0007275|multicellular organismal development|///GO:0000977|RNA pol…			10.8072	8.91571	-0.277569	0.0783	0.165929
ENSG00000005893	ENST00000434600///ENST00000200639///ENST00000486593///ENST00000371335	3920	LAMP2|lysosomal-associated membrane protein 2	chrX:120427826-120469365	GO:0005615|extracellular space|///GO:0016021|integral component of membrane|///GO:0005764|lysosome|///GO:0016020|membrane|///GO:0005886|plasma membrane|///GO:0030168|platelet activation|///GO:0005515|protein binding|///GO:0070062|extracellular exosome|///GO:0031902|late endosome membrane|///GO:0005770|late endosome|///GO:0007596|blood coagulation|///GO:0019899|enzyme binding|///GO:0050821|protein…			215.308	133.307	-0.691647	5e-05	0.00026084
ENSG00000005961	ENST00000588098///ENST00000587295///ENST00000262407///ENST00000592462///ENST00000592226///ENST00000591990///ENST00000589645///ENST00000592075///ENST00000592253///ENST00000592944	3674	ITGA2B|integrin, alpha 2b (platelet glycoprotein IIb of IIb/IIIa complex, antigen CD41)	chr17:44372179-44389505	GO:0007411|axon guidance|///GO:0046872|metal ion binding|///GO:0005886|plasma membrane|///GO:0007155|cell adhesion|///GO:0030168|platelet activation|///GO:0005887|integral component of plasma membrane|///GO:0007229|integrin-mediated signaling pathway|///GO:0008305|integrin complex|///GO:0005515|protein binding|///GO:0042802|identical protein binding|///GO:0072562|blood microparticle|///GO:0070062…			2.92662	0.178069	-4.03872	5e-05	0.00026084
ENSG00000005981	ENST00000257621///ENST00000428113///ENST00000325885	51666	ASB4|ankyrin repeat and SOCS box containing 4	chr7:95478443-95540232	GO:0035556|intracellular signal transduction|///GO:0005515|protein binding|///GO:0031462|Cul2-RING ubiquitin ligase complex|///GO:2001214|positive regulation of vasculogenesis|///GO:0031466|Cul5-RING ubiquitin ligase complex|///GO:0061630|ubiquitin protein ligase activity|///GO:0004842|ubiquitin-protein transferase activity|///GO:0031625|ubiquitin protein ligase binding|///GO:0019899|enzyme bindi…			0	0.00980651	18.6778	1	1
ENSG00000006007	ENST00000353258///ENST00000564172///ENST00000563645///ENST00000569899///ENST00000569773	51573	GDE1|glycerophosphodiester phosphodiesterase 1	chr16:19501688-19522145				84.3759	84.1415	-0.00401338	0.9794	0.986129
ENSG00000006015	ENST00000598375///ENST00000358607///ENST00000450195///ENST00000600997///ENST00000601736///ENST00000597371///ENST00000595490///ENST00000595077	55049	C19orf60|chromosome 19 open reading frame 60	chr19:18571729-18621039	GO:0005515|protein binding|			9.93198	7.01044	-0.502576	0.70825	0.83033
ENSG00000006016	ENST00000594325///ENST00000596360///ENST00000392386///ENST00000597131///ENST00000593286	9244	CRLF1|cytokine receptor-like factor 1	chr19:18571729-18621039				15.5623	12.6659	-0.297109	0.7018	0.826033
ENSG00000006025	ENST00000007414///ENST00000583167///ENST00000579728///ENST00000578461///ENST00000580140///ENST00000580808///ENST00000584698///ENST00000580226///ENST00000585051///ENST00000392507///ENST00000613735	114881	OSBPL7|oxysterol binding protein-like 7	chr17:47807371-47821834				14.3074	16.7205	0.224855	0.371	0.541552
ENSG00000006042	ENST00000394642///ENST00000579849///ENST00000395149///ENST00000261713///ENST00000582227///ENST00000578289///ENST00000439138///ENST00000583437///ENST00000583120	26022	TMEM98|transmembrane protein 98	chr17:32927909-32945106				0.0987381	0.154605	0.646912	1	1
ENSG00000006047	ENST00000007699///ENST00000571834///ENST00000571485///ENST00000571464///ENST00000570720///ENST00000570627///ENST00000571127	51087	YBX2|Y box binding protein 2	chr17:7281666-7294615				23.5621	22.8661	-0.0432623	0.78185	0.876529
ENSG00000006059	ENST00000007735	3883	KRT33A|keratin 33A, type I	chr17:41346091-41350812				0	0	0	1	1
ENSG00000006062	ENST00000344686///ENST00000592267///ENST00000586644///ENST00000617331///ENST00000376926	9020	MAP3K14|mitogen-activated protein kinase kinase kinase 14	chr17:45190930-45317040	GO:0004672|protein kinase activity|///GO:0005524|ATP binding|///GO:0006468|protein phosphorylation|///GO:0006955|immune response|///GO:0005737|cytoplasm|///GO:0005829|cytosol|///GO:0004674|protein serine/threonine kinase activity|///GO:0045087|innate immune response|///GO:0000165|MAPK cascade|///GO:0000186|activation of MAPKK activity|///GO:0004709|MAP kinase kinase kinase activity|///GO:0007346|…			2.2179	0.816594	-1.44151	0.00015	0.000719971
ENSG00000006071	ENST00000526037///ENST00000531642///ENST00000389817///ENST00000526168///ENST00000525022///ENST00000532220///ENST00000528374///ENST00000527905///ENST00000531891///ENST00000531137///ENST00000524561///ENST00000526921///ENST00000529967///ENST00000530147///ENST00000531911///ENST00000532728///ENST00000528202///ENST00000526002///ENST00000302539///ENST00000612903	6833	ABCC8|ATP-binding cassette, sub-family C (CFTR/MRP), member 8	chr11:17392884-17476845				0.792987	1.02629	0.372071	0.31305	0.478146
ENSG00000006116	ENST00000005284	10368	CACNG3|calcium channel, voltage-dependent, gamma subunit 3	chr16:24255552-24362801				0	0	0	1	1
ENSG00000006118	ENST00000537065///ENST00000544065///ENST00000453848///ENST00000005286///ENST00000543732///ENST00000540276///ENST00000537110///ENST00000534983///ENST00000544098///ENST00000536409///ENST00000536928///ENST00000538090///ENST00000540112///ENST00000535480	54972	TMEM132A|transmembrane protein 132A	chr11:60913165-60952530	GO:0016021|integral component of membrane|///GO:0000139|Golgi membrane|///GO:0005789|endoplasmic reticulum membrane|///GO:0003674|molecular_function|///GO:0008150|biological_process|///GO:0070062|extracellular exosome|			32.1393	31.0789	-0.0484032	0.8728	0.926795
ENSG00000006125	ENST00000589774///ENST00000616784///ENST00000621914///ENST00000621668///ENST00000616681///ENST00000620039///ENST00000590538///ENST00000591610///ENST00000612035///ENST00000610402///ENST00000614600///ENST00000590432///ENST00000612116///ENST00000588093///ENST00000592167///ENST00000593014///ENST00000591561///ENST00000619183///ENST00000588116///ENST00000587805///ENST00000618940///ENST00000628168	163	AP2B1|adaptor-related protein complex 2, beta 1 subunit	chr17:35574794-35868891				68.4183	36.8189	-0.893935	5e-05	0.00026084
ENSG00000006128	ENST00000319273///ENST00000350485///ENST00000346867///ENST00000495916///ENST00000491437	6863	TAC1|tachykinin, precursor 1	chr7:97731907-97740472				0	0.0611608	18.6778	1	1
ENSG00000006194	ENST00000538765///ENST00000219069///ENST00000572748///ENST00000573578///ENST00000574253///ENST00000575823///ENST00000575332///ENST00000574674	10127	ZNF263|zinc finger protein 263	chr16:3263742-3318852				25.5018	30.7416	0.269593	0.1492	0.27636
ENSG00000006210	ENST00000006053///ENST00000563383///ENST00000564948///ENST00000565912	6376	CX3CL1|chemokine (C-X3-C motif) ligand 1	chr16:57372457-57385048				0.00626542	0.183844	4.87493	1	1
ENSG00000006282	ENST00000504334///ENST00000006658///ENST00000356488///ENST00000503127///ENST00000505085///ENST00000502911///ENST00000510917///ENST00000511605///ENST00000505456///ENST00000508598///ENST00000505559///ENST00000515526///ENST00000511845///ENST00000511937///ENST00000503063///ENST00000512181///ENST00000634597///ENST00000505336///ENST00000635113///ENST00000512416///ENST00000511347///ENST00000505656///ENS…	64847	SPATA20|spermatogenesis associated 20	chr17:50532542-50555852				24.3124	24.1565	-0.00927907	0.96355	0.976782
ENSG00000006283	ENST00000360761///ENST00000352832///ENST00000442258///ENST00000416767///ENST00000502264///ENST00000512389///ENST00000513964///ENST00000514717///ENST00000510366///ENST00000503485///ENST00000507510///ENST00000511765///ENST00000507336///ENST00000506406///ENST00000504076///ENST00000513689///ENST00000507609///ENST00000503436///ENST00000510115///ENST00000515165///ENST00000514181///ENST00000515765///ENS…	8913	CACNA1G|calcium channel, voltage-dependent, T type, alpha 1G subunit	chr17:50556206-50631940				0.0260944	0.115319	2.14382	1	1
ENSG00000006327	ENST00000573001///ENST00000326577///ENST00000341627///ENST00000574699///ENST00000575124///ENST00000575836///ENST00000571351	51330	TNFRSF12A|tumor necrosis factor receptor superfamily, member 12A	chr16:3014711-3022383				79.1372	197.375	1.31851	5e-05	0.00026084
ENSG00000006377	ENST00000518156///ENST00000493273///ENST00000555308	1750	DLX6|distal-less homeobox 6	chr7:96955140-97014066				0	0	0	1	1
ENSG00000006432	ENST00000554752///ENST00000555993///ENST00000553414///ENST00000381250///ENST00000554146///ENST00000554024///ENST00000611979	4293	MAP3K9|mitogen-activated protein kinase kinase kinase 9	chr14:70722525-70809534				4.52864	5.62841	0.313651	0.0123	0.0355285
ENSG00000006451	ENST00000005257///ENST00000468201///ENST00000436179///ENST00000434466///ENST00000466491	5898	RALA|v-ral simian leukemia viral oncogene homolog A (ras related)	chr7:39623482-39708124				85.6052	90.6019	0.0818438	0.70185	0.826033
ENSG00000006453	ENST00000005260///ENST00000480580///ENST00000462558///ENST00000473569///ENST00000479789	55971	BAIAP2L1|BAI1-associated protein 2-like 1	chr7:98252378-98401068	GO:0005737|cytoplasm|///GO:0003779|actin binding|///GO:0005886|plasma membrane|///GO:0005829|cytosol|///GO:0005654|nucleoplasm|///GO:0015629|actin cytoskeleton|///GO:0007009|plasma membrane organization|///GO:0051017|actin filament bundle assembly|///GO:0005515|protein binding|///GO:0070062|extracellular exosome|///GO:0008286|insulin receptor signaling pathway|///GO:0030838|positive regulation of…			17.8329	13.485	-0.40318	0.05635	0.127124
ENSG00000006459	ENST00000397560///ENST00000472616///ENST00000478996	80853	KDM7A|lysine (K)-specific demethylase 7A	chr7:140084745-140177035				4.5677	9.80524	1.10209	0.00055	0.00234422
ENSG00000006468	ENST00000430479///ENST00000405192///ENST00000405358///ENST00000403527///ENST00000405218///ENST00000443137///ENST00000403685///ENST00000493831///ENST00000472931///ENST00000438956///ENST00000476720///ENST00000443608///ENST00000497115///ENST00000476355///ENST00000421381///ENST00000431887///ENST00000460438///ENST00000483075///ENST00000433547///ENST00000485475///ENST00000420159///ENST00000242066///ENS…	2115	ETV1|ets variant 1	chr7:13891227-13991425	GO:0005634|nucleus|///GO:0006355|regulation of transcription, DNA-templated|///GO:0003700|transcription factor activity, sequence-specific DNA binding|///GO:0000978|RNA polymerase II core promoter proximal region sequence-specific DNA binding|///GO:0045944|positive regulation of transcription from RNA polymerase II promoter|///GO:0043565|sequence-specific DNA binding|///GO:0030154|cell differenti…			0.0508702	0.0508042	-0.00187163	1	1
ENSG00000006530	ENST00000355413///ENST00000473247///ENST00000495028///ENST00000473884///ENST00000492693///ENST00000494688///ENST00000465241///ENST00000496784///ENST00000496273///ENST00000494053///ENST00000629555	55750	AGK|acylglycerol kinase	chr7:141529202-141702153				23.1226	26.5457	0.199177	0.32435	0.490522
ENSG00000006534	ENST00000614849///ENST00000615368///ENST00000619675///ENST00000342456///ENST00000617288///ENST00000617449///ENST00000612297///ENST00000616697///ENST00000527514///ENST00000615463	221	ALDH3B1|aldehyde dehydrogenase 3 family, member B1	chr11:68008577-68030461				1.99356	0.767105	-1.37785	5e-05	0.00026084
ENSG00000006555	ENST00000371276///ENST00000488771///ENST00000371274///ENST00000448308///ENST00000474654	55001	TTC22|tetratricopeptide repeat domain 22	chr1:54779711-54801267				0.0366997	0.413729	3.49485	0.00095	0.00380465
ENSG00000006576	ENST00000422959///ENST00000307305///ENST00000424760///ENST00000415251///ENST00000275575///ENST00000450574///ENST00000248550///ENST00000454592///ENST00000479515///ENST00000468351///ENST00000470215///ENST00000416283	57157	PHTF2|putative homeodomain transcription factor 2	chr7:77798791-77957503				41.721	16.3065	-1.35533	5e-05	0.00026084
ENSG00000006606	ENST00000005180///ENST00000394905	10344	CCL26|chemokine (C-C motif) ligand 26	chr7:75769532-75789896				0.39641	0.845773	1.09328	0.0418	0.0991765
ENSG00000006607	ENST00000264042///ENST00000627550///ENST00000478489///ENST00000373287///ENST00000479427///ENST00000492868///ENST00000418082///ENST00000445489///ENST00000464142///ENST00000473082///ENST00000467260///ENST00000471447///ENST00000485051///ENST00000413432///ENST00000476799///ENST00000473510///ENST00000422951///ENST00000496470///ENST00000491425///ENST00000486736///ENST00000470617///ENST00000444371///ENS…	9855	FARP2|FERM, RhoGEF and pleckstrin domain protein 2	chr2:241356242-241509730				33.2514	27.4233	-0.278012	0.3693	0.539793
ENSG00000006611	ENST00000526313///ENST00000318024///ENST00000527720///ENST00000624811///ENST00000527020///ENST00000529563///ENST00000527551///ENST00000005226///ENST00000534556///ENST00000530700///ENST00000526181	10083	USH1C|Usher syndrome 1C	chr11:17493894-17544416				0.150644	0.269441	0.838831	1	1
ENSG00000006625	ENST00000440082///ENST00000275428///ENST00000409144///ENST00000426081///ENST00000447901///ENST00000409390///ENST00000409436///ENST00000005374	79017	GGCT|gamma-glutamylcyclotransferase	chr7:30496620-30634033	GO:0003839|gamma-glutamylcyclotransferase activity|///GO:0006750|glutathione biosynthetic process|///GO:0042803|protein homodimerization activity|///GO:0006805|xenobiotic metabolic process|///GO:0005829|cytosol|///GO:0070062|extracellular exosome|///GO:0044281|small molecule metabolic process|///GO:0001836|release of cytochrome c from mitochondria|///GO:1901687|glutathione derivative biosynthetic…			172.835	178.153	0.0437255	0.79335	0.882269
ENSG00000006634	ENST00000413643///ENST00000265728///ENST00000495067///ENST00000431138///ENST00000486925///ENST00000430279///ENST00000498144///ENST00000498726	10926	DBF4|DBF4 zinc finger	chr7:87833567-87909541				61.316	25.6644	-1.25649	5e-05	0.00026084
ENSG00000006638	ENST00000375190///ENST00000589966///ENST00000411851///ENST00000587717	6915	TBXA2R|thromboxane A2 receptor	chr19:3594505-3606840				0.0634209	0.063975	0.0125501	1	1
ENSG00000006652	ENST00000432734///ENST00000005558///ENST00000443101///ENST00000445335///ENST00000417662///ENST00000403825///ENST00000429071///ENST00000476927///ENST00000440625///ENST00000466459///ENST00000486688///ENST00000421296///ENST00000489994///ENST00000470441///ENST00000462155///ENST00000621379///ENST00000535603	3475	IFRD1|interferon-related developmental regulator 1	chr7:112422967-112491062				88.9602	64.7766	-0.457689	0.00755	0.0232807
ENSG00000006659	ENST00000392052///ENST00000360675///ENST00000601802	56891	LGALS14|lectin, galactoside-binding, soluble, 14	chr19:39704305-39709444				0	0	0	1	1
ENSG00000006695	ENST00000429152///ENST00000261643///ENST00000581931///ENST00000580561	1352	COX10|COX10 heme A:farnesyltransferase cytochrome c oxidase assembly factor	chr17:14069495-14208677	GO:0016021|integral component of membrane|///GO:0005739|mitochondrion|///GO:0005743|mitochondrial inner membrane|///GO:0031966|mitochondrial membrane|///GO:1902600|hydrogen ion transmembrane transport|///GO:0004129|cytochrome-c oxidase activity|///GO:0044281|small molecule metabolic process|///GO:0006123|mitochondrial electron transport, cytochrome c to oxygen|///GO:0004659|prenyltransferase acti…			11.5878	7.71899	-0.586128	0.00035	0.00155594
ENSG00000006704	ENST00000265755///ENST00000455841///ENST00000424337///ENST00000476977///ENST00000489094///ENST00000470715///ENST00000486086	9569	GTF2IRD1|GTF2I repeat domain containing 1	chr7:74453789-74602604				35.646	53.5253	0.586481	0.00175	0.00649584
ENSG00000006712	ENST00000221265///ENST00000595564///ENST00000595379///ENST00000416728///ENST00000598594///ENST00000595797///ENST00000597365///ENST00000598127	54623	PAF1|PAF1 homolog, Paf1/RNA polymerase II complex component	chr19:39385851-39391195				63.8278	39.6445	-0.687064	0.0001	0.000496109
ENSG00000006715	ENST00000310301///ENST00000395969///ENST00000490924///ENST00000448833///ENST00000482217///ENST00000439468///ENST00000462429///ENST00000466017///ENST00000485955///ENST00000413141///ENST00000265745///ENST00000414632///ENST00000418457///ENST00000457055	27072	VPS41|vacuolar protein sorting 41 homolog (S. cerevisiae)	chr7:38722962-38932394				61.1644	47.4125	-0.367425	0.1499	0.277447
ENSG00000006740	ENST00000379672///ENST00000340825///ENST00000580768///ENST00000262444///ENST00000544416///ENST00000578442///ENST00000538915///ENST00000583608///ENST00000578087///ENST00000581437///ENST00000584974///ENST00000616670	9912	ARHGAP44|Rho GTPase activating protein 44	chr17:12665889-12991643				7.0006	2.75895	-1.34336	5e-05	0.00026084
ENSG00000006744	ENST00000338034///ENST00000395962///ENST00000465825///ENST00000487229///ENST00000426905///ENST00000584650///ENST00000491478///ENST00000492559///ENST00000446899///ENST00000578991///ENST00000476042///ENST00000578104///ENST00000609345///ENST00000609101///ENST00000580504///ENST00000581499///ENST00000609757///ENST00000583371///ENST00000578071///ENST00000484122///ENST00000480891	60528	ELAC2|elaC ribonuclease Z 2	chr17:12992390-13018187				118.197	72.2764	-0.709602	0.00025	0.00114777
ENSG00000006747	ENST00000341757///ENST00000297029///ENST00000417018///ENST00000436854///ENST00000523729///ENST00000518849///ENST00000519209///ENST00000486980///ENST00000473722///ENST00000476649	85477	SCIN|scinderin	chr7:12570124-12660179				4.15468	0.068986	-5.91229	5e-05	0.00026084
ENSG00000006756	ENST00000381154///ENST00000458014///ENST00000495294///ENST00000217890///ENST00000481340///ENST00000494870///ENST00000559324	414	ARSD|arylsulfatase D	chrX:2903969-2929351				23.6921	15.7251	-0.591333	0.0141	0.0398715
ENSG00000006757	ENST00000381042///ENST00000442940///ENST00000537427///ENST00000444736	8228	PNPLA4|patatin-like phospholipase domain containing 4	chrX:7898246-7927739				5.80571	19.1942	1.72512	5e-05	0.00026084
ENSG00000006788	ENST00000418404///ENST00000252172///ENST00000621918	8735	MYH13|myosin, heavy chain 13, skeletal muscle	chr17:10291819-10373130				0	0	0	1	1
ENSG00000006831	ENST00000537545///ENST00000357103///ENST00000540974///ENST00000543456///ENST00000535774///ENST00000544470///ENST00000537190	79602	ADIPOR2|adiponectin receptor 2	chr12:1688573-1788678				58.4924	34.6064	-0.757212	0.00025	0.00114777
ENSG00000006837	ENST00000520693///ENST00000519312///ENST00000265334///ENST00000518990///ENST00000523054///ENST00000521118///ENST00000520592///ENST00000523832///ENST00000521755///ENST00000522501	51265	CDKL3|cyclin-dependent kinase-like 3	chr5:134114710-134371047				1.00873	3.40036	1.75315	0.04915	0.113289
ENSG00000007001	ENST00000605860///ENST00000460456///ENST00000005756///ENST00000489438	151531	UPP2|uridine phosphorylase 2	chr2:157876701-158136154	GO:0005737|cytoplasm|///GO:0005829|cytosol|///GO:0003824|catalytic activity|///GO:0005515|protein binding|///GO:0044281|small molecule metabolic process|///GO:0009116|nucleoside metabolic process|///GO:0016763|transferase activity, transferring pentosyl groups|///GO:0006206|pyrimidine nucleobase metabolic process|///GO:0045098|type III intermediate filament|///GO:0009166|nucleotide catabolic proc…			0.0043702	0.0541202	3.6304	1	1
ENSG00000007038	ENST00000450020///ENST00000005995///ENST00000570629///ENST00000570594///ENST00000574813///ENST00000571141///ENST00000577043///ENST00000575199///ENST00000574265///ENST00000575739	10942	PRSS21|protease, serine, 21 (testisin)	chr16:2817179-2826304				0.0549063	0	-16.6898	1	1
ENSG00000007047	ENST00000587566///ENST00000262891///ENST00000300843///ENST00000592762///ENST00000590909///ENST00000588533///ENST00000588621///ENST00000592207///ENST00000590897///ENST00000620044///ENST00000622871	57787	MARK4|MAP/microtubule affinity-regulating kinase 4	chr19:45071499-45305283	GO:0004672|protein kinase activity|///GO:0005524|ATP binding|///GO:0006468|protein phosphorylation|///GO:0007399|nervous system development|///GO:0005815|microtubule organizing center|///GO:0005813|centrosome|///GO:0008017|microtubule binding|///GO:0005829|cytosol|///GO:0043005|neuron projection|///GO:0004674|protein serine/threonine kinase activity|///GO:0000226|microtubule cytoskeleton organiza…			15.7132	16.7948	0.0960309	0.78685	0.878623
ENSG00000007062	ENST00000503884///ENST00000505450///ENST00000513448///ENST00000508167///ENST00000510224///ENST00000513946///ENST00000511270///ENST00000511153///ENST00000502943///ENST00000508322///ENST00000508940///ENST00000514967///ENST00000504842///ENST00000513108///ENST00000502501///ENST00000514693///ENST00000512304///ENST00000447510///ENST00000540805///ENST00000539194	8842	PROM1|prominin 1	chr4:15960242-16084378				0.023384	0.128685	2.46024	1	1
ENSG00000007080	ENST00000445755///ENST00000602080///ENST00000597436///ENST00000596123	115098	CCDC124|coiled-coil domain containing 124	chr19:17933015-17943991	GO:0051301|cell division|///GO:0005737|cytoplasm|///GO:0005815|microtubule organizing center|///GO:0005886|plasma membrane|///GO:0007049|cell cycle|///GO:0030496|midbody|///GO:0044822|poly(A) RNA binding|			9.57278	5.97627	-0.679694	0.0003	0.00135017
ENSG00000007129	ENST00000618577///ENST00000407170///ENST00000482870///ENST00000457737///ENST00000187608///ENST00000401445///ENST00000632983	90273	CEACAM21|carcinoembryonic antigen-related cell adhesion molecule 21	chr19:41545191-41786893	GO:0016021|integral component of membrane|///GO:0005515|protein binding|///GO:0004872|receptor activity|			0.0307167	0.347762	3.50101	0.00165	0.00615958
ENSG00000007168	ENST00000576586///ENST00000397195///ENST00000575477///ENST00000572915///ENST00000570400///ENST00000571289///ENST00000574816///ENST00000609078///ENST00000397193///ENST00000574468///ENST00000571495///ENST00000610190///ENST00000574213	5048	PAFAH1B1|platelet-activating factor acetylhydrolase 1b, regulatory subunit 1 (45kDa)	chr17:2593209-2685615				154.461	101.654	-0.603577	0.0009	0.00362734
ENSG00000007171	ENST00000313735///ENST00000621962	4843	NOS2|nitric oxide synthase 2, inducible	chr17:27756765-27894752				0	0.00472703	18.6778	1	1
ENSG00000007174	ENST00000262442///ENST00000579828///ENST00000579406///ENST00000454412///ENST00000579602///ENST00000579813///ENST00000585197///ENST00000583192///ENST00000584663///ENST00000578834///ENST00000579703///ENST00000580255///ENST00000396001///ENST00000581682///ENST00000608377	1770	DNAH9|dynein, axonemal, heavy chain 9	chr17:11598430-11997510				0	0.00947272	18.6778	1	1
ENSG00000007202	ENST00000528896///ENST00000389003///ENST00000583860///ENST00000579924///ENST00000580395///ENST00000577261///ENST00000582417///ENST00000581064///ENST00000580882///ENST00000581267///ENST00000577417///ENST00000583403///ENST00000577580///ENST00000579253///ENST00000582901///ENST00000544884	9703	KIAA0100|KIAA0100	chr17:28455751-28645454				99.7514	71.3316	-0.483796	0.1608	0.292034
ENSG00000007216	ENST00000444914///ENST00000314669///ENST00000577903///ENST00000541739///ENST00000579281///ENST00000459818///ENST00000545060	9058	SLC13A2|solute carrier family 13 (sodium-dependent dicarboxylate transporter), member 2	chr17:28455751-28645454				0	0.45391	18.6778	0.03385	0.0831472
ENSG00000007237	ENST00000437099///ENST00000323816///ENST00000432992///ENST00000585266///ENST00000580865///ENST00000583882///ENST00000542249///ENST00000396115///ENST00000579158///ENST00000581112///ENST00000578456///ENST00000581871///ENST00000580811///ENST00000584146///ENST00000579140///ENST00000578655///ENST00000578599///ENST00000584389///ENST00000580043	8522	GAS7|growth arrest-specific 7	chr17:9910608-10198551	GO:0006355|regulation of transcription, DNA-templated|///GO:0003700|transcription factor activity, sequence-specific DNA binding|///GO:0005737|cytoplasm|///GO:0007050|cell cycle arrest|///GO:0005515|protein binding|///GO:0001726|ruffle|///GO:0005884|actin filament|///GO:0048812|neuron projection morphogenesis|///GO:0030182|neuron differentiation|///GO:0051015|actin filament binding|///GO:0008360|…			0.139367	0.17347	0.315797	1	1
ENSG00000007255	ENST00000006275///ENST00000588062///ENST00000585934///ENST00000592647///ENST00000587818	79090	TRAPPC6A|trafficking protein particle complex 6A	chr19:45071499-45305283	GO:0005829|cytosol|///GO:0000139|Golgi membrane|///GO:0005783|endoplasmic reticulum|///GO:0006888|ER to Golgi vesicle-mediated transport|///GO:0005515|protein binding|///GO:0018279|protein N-linked glycosylation via asparagine|///GO:0048208|COPII vesicle coating|///GO:0044267|cellular protein metabolic process|///GO:0061024|membrane organization|///GO:0043687|post-translational protein modificati…			8.80834	6.0529	-0.541244	0.47015	0.639813
ENSG00000007264	ENST00000395040///ENST00000310132///ENST00000585778///ENST00000395045///ENST00000590493///ENST00000588983///ENST00000587180///ENST00000590028///ENST00000590849///ENST00000591059///ENST00000590980///ENST00000590821///ENST00000592612///ENST00000592300///ENST00000619596///ENST00000612526	4145	MATK|megakaryocyte-associated tyrosine kinase	chr19:3777969-3802129				2.04117	2.55922	0.326307	0.1789	0.315226
ENSG00000007306	ENST00000006724///ENST00000401731///ENST00000602225///ENST00000599715	1087	CEACAM7|carcinoembryonic antigen-related cell adhesion molecule 7	chr19:41545191-41786893				0.0121594	0.619651	5.67131	0.00345	0.0117448
ENSG00000007312	ENST00000392795///ENST00000006750///ENST00000559358///ENST00000349817///ENST00000558969///ENST00000583260	974	CD79B|CD79b molecule, immunoglobulin-associated beta	chr17:63928739-63932354				0.0423238	0.185222	2.12972	1	1
ENSG00000007314	ENST00000578147///ENST00000584310///ENST00000581514///ENST00000435607	6329	SCN4A|sodium channel, voltage gated, type IV alpha subunit	chr17:63938553-63972918				0	0.0176155	18.6778	1	1
ENSG00000007341	ENST00000361846///ENST00000360743///ENST00000358039///ENST00000490715///ENST00000480988///ENST00000495109///ENST00000498197///ENST00000477682///ENST00000369669///ENST00000490067///ENST00000497457///ENST00000343210///ENST00000369666///ENST00000463235///ENST00000418497///ENST00000497235///ENST00000369664///ENST00000466360///ENST00000479436///ENST00000470519///ENST00000459630///ENST00000477332///ENS…	54879	ST7L|suppression of tumorigenicity 7 like	chr1:112466540-112671619				22.283	21.6551	-0.0412345	0.93675	0.960925
ENSG00000007350	ENST00000369915///ENST00000439635///ENST00000426989///ENST00000426203///ENST00000369912///ENST00000465168///ENST00000482044///ENST00000463884	8277	TKTL1|transketolase-like 1	chrX:154257537-154330350	GO:0046872|metal ion binding|///GO:0008152|metabolic process|///GO:0005634|nucleus|///GO:0005737|cytoplasm|///GO:0003824|catalytic activity|///GO:0006772|thiamine metabolic process|///GO:0006007|glucose catabolic process|///GO:0004802|transketolase activity|			0.0231188	0.00397217	-2.54107	1	1
ENSG00000007372	ENST00000379132///ENST00000379129///ENST00000379107///ENST00000464174///ENST00000241001///ENST00000379115///ENST00000474783///ENST00000379111///ENST00000379123///ENST00000494377///ENST00000470027///ENST00000379109///ENST00000533333///ENST00000532916///ENST00000530373///ENST00000531910///ENST00000471303///ENST00000455099///ENST00000481563///ENST00000534390///ENST00000534353///ENST00000530714///ENS…	5080	PAX6|paired box 6	chr11:31784791-32105755				0.113707	0.0462452	-1.29794	1	1
ENSG00000007376	ENST00000561734///ENST00000007264///ENST00000565809///ENST00000567114///ENST00000569601///ENST00000565377///ENST00000567283///ENST00000562070///ENST00000565503///ENST00000563560	113000	RPUSD1|RNA pseudouridylate synthase domain containing 1	chr16:784973-800737	GO:0003723|RNA binding|///GO:0005739|mitochondrion|///GO:0001522|pseudouridine synthesis|///GO:0009982|pseudouridine synthase activity|///GO:0019239|deaminase activity|///GO:0003674|molecular_function|///GO:0005575|cellular_component|///GO:0008150|biological_process|///GO:0009451|RNA modification|///GO:0031119|tRNA pseudouridine synthesis|			3.01128	4.41782	0.552958	0.06195	0.137405
ENSG00000007384	ENST00000262316///ENST00000428730///ENST00000448893///ENST00000486045///ENST00000493647///ENST00000482904///ENST00000417043///ENST00000487201///ENST00000450643///ENST00000419764///ENST00000472390	64285	RHBDF1|rhomboid 5 homolog 1 (Drosophila)	chr16:58058-76355	GO:0016021|integral component of membrane|///GO:0015031|protein transport|///GO:0061136|regulation of proteasomal protein catabolic process|///GO:0004252|serine-type endopeptidase activity|///GO:0000139|Golgi membrane|///GO:0005789|endoplasmic reticulum membrane|///GO:0016477|cell migration|///GO:0008283|cell proliferation|///GO:0042058|regulation of epidermal growth factor receptor signaling pat…			22.4067	48.9859	1.12844	5e-05	0.00026084
ENSG00000007392	ENST00000293872///ENST00000337351///ENST00000397783///ENST00000468732///ENST00000429378///ENST00000490762///ENST00000464711///ENST00000442701///ENST00000397780///ENST00000419516///ENST00000495349///ENST00000418978///ENST00000430864///ENST00000443357///ENST00000494366///ENST00000469109///ENST00000428363///ENST00000467552///ENST00000494545///ENST00000629543///ENST00000426094	55692	LUC7L|LUC7-like	chr16:188968-229463	GO:0003729|mRNA binding|///GO:0005685|U1 snRNP|///GO:0071004|U2-type prespliceosome|///GO:0006376|mRNA splice site selection|///GO:0005515|protein binding|///GO:0042802|identical protein binding|///GO:0005634|nucleus|///GO:0050733|RS domain binding|///GO:0045843|negative regulation of striated muscle tissue development|			94.6611	114.012	0.268341	0.0545	0.123547
ENSG00000007402	ENST00000423994///ENST00000429770///ENST00000266039///ENST00000360963///ENST00000483620///ENST00000424201///ENST00000479441///ENST00000487413	9254	CACNA2D2|calcium channel, voltage-dependent, alpha 2/delta subunit 2	chr3:50347329-50504244				0.222299	0.682052	1.61738	0.01405	0.039753
ENSG00000007516	ENST00000426824///ENST00000565665///ENST00000397488///ENST00000562208///ENST00000568887///ENST00000567825///ENST00000324385///ENST00000421665///ENST00000568198///ENST00000566162///ENST00000561602///ENST00000561793///ENST00000564213///ENST00000567203///ENST00000566389///ENST00000628027	8938	BAIAP3|BAI1-associated protein 3	chr16:1333600-1351911				3.0799	5.88387	0.933884	0.10875	0.215764
ENSG00000007520	ENST00000007390///ENST00000566296	115939	TSR3|TSR3, 20S rRNA accumulation, homolog (S. cerevisiae)	chr16:1333600-1351911	GO:0030490|maturation of SSU-rRNA|			8.63305	13.4869	0.643616	0.00025	0.00114777
ENSG00000007541	ENST00000293874///ENST00000409527///ENST00000321878///ENST00000439574///ENST00000422307///ENST00000026218///ENST00000470411///ENST00000443147///ENST00000544860///ENST00000537901///ENST00000420990///ENST00000635205///ENST00000480424///ENST00000540241///ENST00000476438///ENST00000540548///ENST00000634341	9091	PIGQ|phosphatidylinositol glycan anchor biosynthesis, class Q	chr16:566994-584136				6.64255	14.0525	1.08102	5e-05	0.00026084
ENSG00000007545	ENST00000397412///ENST00000492778///ENST00000498594///ENST00000415022///ENST00000466562///ENST00000467286///ENST00000468839///ENST00000293925	57585	CRAMP1|cramped chromatin regulator homolog 1	chr16:1612324-1702280				12.5142	11.4961	-0.122412	0.7224	0.840048
ENSG00000007866	ENST00000402886///ENST00000338863///ENST00000433586	7005	TEAD3|TEA domain family member 3	chr6:35473596-35497076				7.39995	12.874	0.798878	5e-05	0.00026084
ENSG00000007908	ENST00000367775///ENST00000367777///ENST00000367776///ENST00000333360///ENST00000367774///ENST00000461085///ENST00000609271	6401	SELE|selectin E	chr1:169662006-169894267				0.00609595	0.0378148	2.63303	1	1
ENSG00000007923	ENST00000465508///ENST00000451196///ENST00000377577///ENST00000294401///ENST00000472414///ENST00000426784///ENST00000473993///ENST00000469318///ENST00000485073///ENST00000460594///ENST00000465911	55735	DNAJC11|DnaJ (Hsp40) homolog, subfamily C, member 11	chr1:6624865-6701924				63.066	49.3202	-0.354684	0.1675	0.30056
ENSG00000007933	ENST00000367755///ENST00000530212///ENST00000534514///ENST00000472784///ENST00000479749///ENST00000478457	2328	FMO3|flavin containing monooxygenase 3	chr1:171090876-171117819	GO:0016021|integral component of membrane|///GO:0043231|intracellular membrane-bounded organelle|///GO:0006805|xenobiotic metabolic process|///GO:0055114|oxidation-reduction process|///GO:0050660|flavin adenine dinucleotide binding|///GO:0005789|endoplasmic reticulum membrane|///GO:0004499|N,N-dimethylaniline monooxygenase activity|///GO:0050661|NADP binding|///GO:0044281|small molecule metabolic…			0	0	0	1	1
ENSG00000007944	ENST00000356840///ENST00000349606	29116	MYLIP|myosin regulatory light chain interacting protein	chr6:16129124-16148248				25.2698	22.6056	-0.160734	0.19035	0.330274
ENSG00000007952	ENST00000372966///ENST00000372964///ENST00000427768///ENST00000217885///ENST00000372960	27035	NOX1|NADPH oxidase 1	chrX:100843323-100874345	GO:0016021|integral component of membrane|///GO:0001525|angiogenesis|///GO:0046872|metal ion binding|///GO:0034765|regulation of ion transmembrane transport|///GO:0007264|small GTPase mediated signal transduction|///GO:0055114|oxidation-reduction process|///GO:0007165|signal transduction|///GO:0006954|inflammatory response|///GO:0005886|plasma membrane|///GO:0016491|oxidoreductase activity|///GO:…			0.485469	0.299187	-0.698332	0.21	0.355479
ENSG00000007968	ENST00000361729///ENST00000487237	1870	E2F2|E2F transcription factor 2	chr1:23506429-23531220				6.74447	2.04071	-1.72463	5e-05	0.00026084
ENSG00000008018	ENST00000262193///ENST00000462957	5689	PSMB1|proteasome subunit beta 1	chr6:170535116-170553341				365.965	292.534	-0.323104	0.00345	0.0117448
ENSG00000008056	ENST00000295987///ENST00000340666	6853	SYN1|synapsin I	chrX:47561099-47619853				0.0624063	1.01668	4.02603	0.0332	0.0817654
ENSG00000008083	ENST00000341776///ENST00000474854///ENST00000397311	3720	JARID2|jumonji, AT rich interactive domain 2	chr6:15246295-15522040	GO:0003677|DNA binding|///GO:0005634|nucleus|///GO:0006351|transcription, DNA-templated|///GO:0003682|chromatin binding|///GO:0045892|negative regulation of transcription, DNA-templated|///GO:0005654|nucleoplasm|///GO:0016568|chromatin modification|///GO:0007417|central nervous system development|///GO:0010467|gene expression|///GO:0048863|stem cell differentiation|///GO:0040029|regulation of gen…			41.2958	17.7259	-1.22014	5e-05	0.00026084
ENSG00000008086	ENST00000379996///ENST00000379989///ENST00000624953///ENST00000623364///ENST00000624700///ENST00000463994///ENST00000623535///ENST00000623610	6792	CDKL5|cyclin-dependent kinase-like 5	chrX:18425582-18672109				3.17871	2.11966	-0.584608	0.07105	0.153295
ENSG00000008118	ENST00000009105///ENST00000423146///ENST00000361322///ENST00000494990	57172	CAMK1G|calcium/calmodulin-dependent protein kinase IG	chr1:209583716-209613938	GO:0004672|protein kinase activity|///GO:0005524|ATP binding|///GO:0006468|protein phosphorylation|///GO:0005886|plasma membrane|///GO:0000139|Golgi membrane|///GO:0005516|calmodulin binding|///GO:0004683|calmodulin-dependent protein kinase activity|///GO:0012505|endomembrane system|///GO:0005954|calcium- and calmodulin-dependent protein kinase complex|///GO:0005737|cytoplasm|///GO:0043005|neuron…			0	0.0157458	18.6778	1	1
ENSG00000008128	ENST00000479362///ENST00000498810///ENST00000487462///ENST00000401096///ENST00000491311///ENST00000495016///ENST00000468800///ENST00000464748///ENST00000489300///ENST00000492390///ENST00000474916///ENST00000404249///ENST00000460465///ENST00000357760///ENST00000358779///ENST00000378633///ENST00000478901///ENST00000468397///ENST00000356200///ENST00000463652///ENST00000356937///ENST00000378638///ENS…	728642	CDK11A|cyclin-dependent kinase 11A	chr1:1632094-1745992				23.4048	27.6039	0.238067	0.57595	0.733406
ENSG00000008130	ENST00000341426///ENST00000341991///ENST00000378625///ENST00000342348///ENST00000498806///ENST00000469045///ENST00000480499///ENST00000497747///ENST00000477235///ENST00000489538///ENST00000497615///ENST00000497186///ENST00000492845///ENST00000492768///ENST00000460602///ENST00000464373///ENST00000480542	65220	NADK|NAD kinase	chr1:1751231-1780457				39.6151	54.5581	0.461743	0.16205	0.293571
ENSG00000008196	ENST00000344788///ENST00000393655///ENST00000489228	7021	TFAP2B|transcription factor AP-2 beta (activating enhancer binding protein 2 beta)	chr6:50818722-50847613				0	0.00364915	18.6778	1	1
ENSG00000008197	ENST00000008391///ENST00000492804	83741	TFAP2D|transcription factor AP-2 delta (activating enhancer binding protein 2 delta)	chr6:50713827-50772988				0	0	0	1	1
ENSG00000008226	ENST00000440294///ENST00000308059///ENST00000447130///ENST00000469151///ENST00000477260///ENST00000478428///ENST00000346219	9940	DLEC1|deleted in lung and esophageal cancer 1	chr3:38039204-38137242				0.0385915	0.0257866	-0.581662	1	1
ENSG00000008256	ENST00000350796///ENST00000465320///ENST00000495176///ENST00000461891///ENST00000488964///ENST00000466543///ENST00000491641///ENST00000478541///ENST00000481329///ENST00000482460///ENST00000396741	9265	CYTH3|cytohesin 3	chr7:6161775-6272644	GO:0043547|positive regulation of GTPase activity|///GO:0005886|plasma membrane|///GO:0005829|cytosol|///GO:0031234|extrinsic component of cytoplasmic side of plasma membrane|///GO:0005086|ARF guanyl-nucleotide exchange factor activity|///GO:0032012|regulation of ARF protein signal transduction|///GO:0030155|regulation of cell adhesion|///GO:0048193|Golgi vesicle transport|///GO:0005515|protein b…			4.87644	3.59771	-0.438749	0.0582	0.130414
ENSG00000008277	ENST00000398204///ENST00000439864///ENST00000412441///ENST00000398201///ENST00000265727///ENST00000398209///ENST00000398203///ENST00000478920///ENST00000426930///ENST00000413139///ENST00000476330	53616	ADAM22|ADAM metallopeptidase domain 22	chr7:87934142-88202889	GO:0006508|proteolysis|///GO:0008270|zinc ion binding|///GO:0016021|integral component of membrane|///GO:0005886|plasma membrane|///GO:0007155|cell adhesion|///GO:0004222|metalloendopeptidase activity|///GO:0005178|integrin binding|///GO:0007417|central nervous system development|///GO:0005515|protein binding|///GO:0030424|axon|///GO:0007162|negative regulation of cell adhesion|///GO:0008344|adul…			4.48154	1.50652	-1.57278	0.00015	0.000719971
ENSG00000008282	ENST00000455385///ENST00000011473///ENST00000464029///ENST00000470347///ENST00000634737///ENST00000460770///ENST00000483448	6856	SYPL1|synaptophysin-like 1	chr7:106090502-106112576				183.668	125.872	-0.545142	5e-05	0.00026084
ENSG00000008283	ENST00000392975///ENST00000360793///ENST00000584031///ENST00000582297///ENST00000581573///ENST00000448884///ENST00000585153///ENST00000582034///ENST00000542042///ENST00000580691///ENST00000581163///ENST00000582997///ENST00000582143///ENST00000584291///ENST00000577989///ENST00000577368///ENST00000578016///ENST00000578072///ENST00000583478///ENST00000580592///ENST00000392976	1534	CYB561|cytochrome b561	chr17:63432303-63446378	GO:0016021|integral component of membrane|///GO:0046872|metal ion binding|///GO:0055085|transmembrane transport|///GO:0055114|oxidation-reduction process|///GO:0016491|oxidoreductase activity|///GO:0005515|protein binding|///GO:0022900|electron transport chain|///GO:0000293|ferric-chelate reductase activity|///GO:0022865|transmembrane electron transfer carrier|			105.121	103.888	-0.0170132	0.8781	0.928957
ENSG00000008294	ENST00000262013///ENST00000509724///ENST00000510283///ENST00000505279///ENST00000357122///ENST00000506500///ENST00000513746///ENST00000511312///ENST00000513906///ENST00000514613///ENST00000505173///ENST00000514205///ENST00000506483///ENST00000513827///ENST00000515685///ENST00000513547///ENST00000511795///ENST00000576492///ENST00000510855///ENST00000511987///ENST00000502329///ENST00000618113	9043	SPAG9|sperm associated antigen 9	chr17:50962173-51120865				129.232	52.1268	-1.30987	0.00155	0.00583285
ENSG00000008300	ENST00000164024///ENST00000461362///ENST00000498057///ENST00000470999	1951	CELSR3|cadherin, EGF LAG seven-pass G-type receptor 3	chr3:48636468-48662915	GO:0005509|calcium ion binding|///GO:0016021|integral component of membrane|///GO:0007186|G-protein coupled receptor signaling pathway|///GO:0016020|membrane|///GO:0005886|plasma membrane|///GO:0007156|homophilic cell adhesion via plasma membrane adhesion molecules|///GO:0007155|cell adhesion|///GO:0004930|G-protein coupled receptor activity|///GO:0004888|transmembrane signaling receptor activity…			1.86533	3.54033	0.92445	0.00025	0.00114777
ENSG00000008311	ENST00000460376///ENST00000393376///ENST00000473553///ENST00000417368///ENST00000431170///ENST00000358954///ENST00000426162	10157	AASS|aminoadipate-semialdehyde synthase	chr7:122075646-122144280				0.341246	0.426378	0.32132	0.4128	0.58521
ENSG00000008323	ENST00000011684///ENST00000536531///ENST00000538208///ENST00000396988///ENST00000449001///ENST00000543000///ENST00000535616///ENST00000544743///ENST00000304581	55200	PLEKHG6|pleckstrin homology domain containing, family G (with RhoGef domain) member 6	chr12:6310435-6328506				2.10656	1.72368	-0.289399	0.5411	0.703692
ENSG00000008324	ENST00000447630///ENST00000474941///ENST00000011691	51188	SS18L2|synovial sarcoma translocation gene on chromosome 18-like 2	chr3:42547968-42665854				28.2892	30.6538	0.115812	0.7392	0.851316
ENSG00000008382	ENST00000262966///ENST00000359935///ENST00000599840///ENST00000594716///ENST00000596722///ENST00000597036///ENST00000601877///ENST00000594162	84954	MPND|MPN domain containing	chr19:4343526-4360086				14.8418	5.13227	-1.532	5e-05	0.00026084
ENSG00000008394	ENST00000536371///ENST00000534835///ENST00000543076///ENST00000396210///ENST00000539036///ENST00000537878///ENST00000542256///ENST00000539708///ENST00000535309///ENST00000540056///ENST00000540126///ENST00000538885///ENST00000396207///ENST00000538857///ENST00000535624///ENST00000624056///ENST00000359720///ENST00000010404///ENST00000396209	4257	MGST1|microsomal glutathione S-transferase 1	chr12:16347141-16610594				941.745	276.548	-1.76781	5e-05	0.00026084
ENSG00000008405	ENST00000008527///ENST00000552790///ENST00000549356///ENST00000546722///ENST00000550633	1407	CRY1|cryptochrome circadian clock 1	chr12:106991363-107123314				23.3641	12.8977	-0.857181	0.0003	0.00135017
ENSG00000008438	ENST00000008938	8993	PGLYRP1|peptidoglycan recognition protein 1	chr19:45995460-46023065				0.0157493	0	-16.6898	1	1
ENSG00000008441	ENST00000397661///ENST00000592199///ENST00000590027///ENST00000585382///ENST00000587760///ENST00000585575///ENST00000360105///ENST00000588228///ENST00000586797///ENST00000591028///ENST00000586873///ENST00000587260///ENST00000588680///ENST00000358552	4784	NFIX|nuclear factor I/X (CCAAT-binding transcription factor)	chr19:12995607-13098796	GO:0003677|DNA binding|///GO:0005634|nucleus|///GO:0006355|regulation of transcription, DNA-templated|///GO:0003700|transcription factor activity, sequence-specific DNA binding|///GO:0005622|intracellular|///GO:0045944|positive regulation of transcription from RNA polymerase II promoter|///GO:0000122|negative regulation of transcription from RNA polymerase II promoter|///GO:0006366|transcription …			4.95478	8.0841	0.706266	0.1195	0.23235
ENSG00000008513	ENST00000521180///ENST00000522652///ENST00000523854///ENST00000517668///ENST00000522204///ENST00000523634///ENST00000519924///ENST00000523855///ENST00000519435///ENST00000518298///ENST00000520020///ENST00000522873///ENST00000521627///ENST00000522285///ENST00000399640	6482	ST3GAL1|ST3 beta-galactoside alpha-2,3-sialyltransferase 1	chr8:133454847-133571940	GO:0016020|membrane|///GO:0005975|carbohydrate metabolic process|///GO:0000139|Golgi membrane|///GO:0006464|cellular protein modification process|///GO:0006486|protein glycosylation|///GO:0008373|sialyltransferase activity|///GO:0097503|sialylation|///GO:0030173|integral component of Golgi membrane|///GO:0006487|protein N-linked glycosylation|///GO:0018279|protein N-linked glycosylation via aspar…			24.8982	20.3341	-0.292138	0.14555	0.271211
ENSG00000008516	ENST00000336577///ENST00000570755///ENST00000575441///ENST00000612971	64386	MMP25|matrix metallopeptidase 25	chr16:3046680-3060726	GO:0005509|calcium ion binding|///GO:0006508|proteolysis|///GO:0008270|zinc ion binding|///GO:0016020|membrane|///GO:0006954|inflammatory response|///GO:0005886|plasma membrane|///GO:0005578|proteinaceous extracellular matrix|///GO:0031225|anchored component of membrane|///GO:0004222|metalloendopeptidase activity|///GO:0031012|extracellular matrix|///GO:0008237|metallopeptidase activity|///GO:006…			0.114268	1.0009	3.13081	0.0009	0.00362734
ENSG00000008517	ENST00000325568///ENST00000534507///ENST00000531965///ENST00000396887///ENST00000532086///ENST00000529699///ENST00000526464///ENST00000440815///ENST00000529550///ENST00000551122///ENST00000525643///ENST00000548807///ENST00000528163///ENST00000530890///ENST00000444393///ENST00000533097///ENST00000534748///ENST00000008180///ENST00000532247///ENST00000396890///ENST00000525228///ENST00000548652///ENS…	9235	IL32|interleukin 32	chr16:3065296-3087100				0.28727	1.18421	2.04344	5e-05	0.00026084
ENSG00000008710	ENST00000262304///ENST00000423118///ENST00000472577///ENST00000564313///ENST00000561668///ENST00000487932///ENST00000485120///ENST00000562425///ENST00000567355///ENST00000472659///ENST00000568796///ENST00000570253///ENST00000562297///ENST00000567946///ENST00000486339///ENST00000415938///ENST00000483731///ENST00000566905///ENST00000496574///ENST00000566784///ENST00000471603///ENST00000480227///ENS…	5310	PKD1|polycystic kidney disease 1 (autosomal dominant)	chr16:2039814-2135898				8.05425	20.3455	1.33689	0.0121	0.0350178
ENSG00000008735	ENST00000329492///ENST00000008876	23542	MAPK8IP2|mitogen-activated protein kinase 8 interacting protein 2	chr22:50568860-50613981				0.410303	5.26103	3.68059	5e-05	0.00026084
ENSG00000008838	ENST00000394126///ENST00000356271///ENST00000394128///ENST00000394127///ENST00000491466///ENST00000535508///ENST00000579364///ENST00000422942///ENST00000501516///ENST00000470126///ENST00000535071///ENST00000492176///ENST00000580720///ENST00000580885///ENST00000581058///ENST00000580921///ENST00000584782///ENST00000495586///ENST00000578901///ENST00000584077///ENST00000585249///ENST00000577488///ENS…	9862	MED24|mediator complex subunit 24	chr17:40019096-40100725				37.4641	29.0206	-0.368433	0.0814	0.171223
ENSG00000008853	ENST00000519685///ENST00000524077///ENST00000518534///ENST00000522948///ENST00000251822///ENST00000517528///ENST00000523918///ENST00000519210	23221	RHOBTB2|Rho-related BTB domain containing 2	chr8:22687658-23083619	GO:0005525|GTP binding|///GO:0016020|membrane|///GO:0005622|intracellular|///GO:0007264|small GTPase mediated signal transduction|///GO:0015031|protein transport|///GO:0007165|signal transduction|///GO:0005886|plasma membrane|///GO:0005829|cytosol|///GO:0051056|regulation of small GTPase mediated signal transduction|///GO:0005515|protein binding|			4.29514	4.19971	-0.0324145	0.9438	0.96478
ENSG00000008869	ENST00000425467///ENST00000233099///ENST00000471051///ENST00000467978///ENST00000478810	54497	HEATR5B|HEAT repeat containing 5B	chr2:36968382-37084342				9.53773	9.88935	0.0522289	0.6864	0.815572
ENSG00000008952	ENST00000461933///ENST00000337002///ENST00000460513///ENST00000480708///ENST00000487736///ENST00000469515///ENST00000481435///ENST00000497277///ENST00000469890///ENST00000470355	7095	SEC62|SEC62 homolog, preprotein translocation factor	chr3:169939352-169998373				114.968	60.9619	-0.915254	5e-05	0.00026084
ENSG00000008988	ENST00000519807///ENST00000009589///ENST00000524349///ENST00000520490///ENST00000521262///ENST00000520627///ENST00000523936///ENST00000519606///ENST00000521289///ENST00000518875///ENST00000519369///ENST00000618656	6224	RPS20|ribosomal protein S20	chr8:56067294-56074581				886.725	863.766	-0.0378464	0.75595	0.861211
ENSG00000009307	ENST00000339438///ENST00000438362///ENST00000358528///ENST00000261443///ENST00000530886///ENST00000369530///ENST00000483407///ENST00000534699///ENST00000483030///ENST00000530784///ENST00000529046///ENST00000525132///ENST00000534389///ENST00000525878///ENST00000525970///ENST00000533818///ENST00000524652///ENST00000610726	7812	CSDE1|cold shock domain containing E1, RNA-binding	chr1:114716912-114758676	GO:0003677|DNA binding|///GO:0003676|nucleic acid binding|///GO:0006355|regulation of transcription, DNA-templated|///GO:0005737|cytoplasm|///GO:0005886|plasma membrane|///GO:0005794|Golgi apparatus|///GO:0044822|poly(A) RNA binding|///GO:0005515|protein binding|///GO:0008584|male gonad development|///GO:0070937|CRD-mediated mRNA stability complex|///GO:0070966|nuclear-transcribed mRNA catabolic …			2893.95	1563.21	-0.888535	5e-05	0.00026084
ENSG00000009335	ENST00000348165///ENST00000389103///ENST00000430750///ENST00000469336///ENST00000470408///ENST00000497368///ENST00000494532///ENST00000474153///ENST00000611269	9690	UBE3C|ubiquitin protein ligase E3C	chr7:157138912-157269372				78.0129	111.292	0.512559	0.01805	0.0490425
ENSG00000009413	ENST00000462119///ENST00000434009///ENST00000368802///ENST00000368805///ENST00000422377///ENST00000413831///ENST00000492520///ENST00000467500///ENST00000470871///ENST00000460981///ENST00000494858///ENST00000435970///ENST00000358835///ENST00000619481	5980	REV3L|REV3-like, polymerase (DNA directed), zeta, catalytic subunit	chr6:111299027-111606278	GO:0016035|zeta DNA polymerase complex|///GO:0042276|error-prone translesion synthesis|///GO:0003677|DNA binding|///GO:0000166|nucleotide binding|///GO:0003676|nucleic acid binding|///GO:0046872|metal ion binding|///GO:0003887|DNA-directed DNA polymerase activity|///GO:0006261|DNA-dependent DNA replication|///GO:0008408|3'-5' exonuclease activity|///GO:0090305|nucleic acid phosphodiester bond hyd…			34.5446	17.096	-1.0148	0.00265	0.009369
ENSG00000009694	ENST00000371130///ENST00000461429///ENST00000422452	10178	TENM1|teneurin transmembrane protein 1	chrX:123959232-124963817				0.00358766	0.0673691	4.23097	1	1
ENSG00000009709	ENST00000375375///ENST00000420770///ENST00000400661	5081	PAX7|paired box 7	chr1:18631005-18748866				0	0.0116199	18.6778	1	1
ENSG00000009724	ENST00000400897///ENST00000478645///ENST00000480221///ENST00000400898	10747	MASP2|mannan-binding lectin serine peptidase 2	chr1:11012343-11047233				0.2484	0.660998	1.41198	0.4338	0.605796
ENSG00000009765	ENST00000229447///ENST00000344419///ENST00000367335///ENST00000392256///ENST00000392255///ENST00000500320///ENST00000546121///ENST00000422583///ENST00000425615	389434	IYD|iodotyrosine deiodinase	chr6:150368891-150405969	GO:0016021|integral component of membrane|///GO:0055114|oxidation-reduction process|///GO:0005886|plasma membrane|///GO:0016491|oxidoreductase activity|///GO:0005515|protein binding|///GO:0006590|thyroid hormone generation|///GO:0044281|small molecule metabolic process|///GO:0034641|cellular nitrogen compound metabolic process|			0.0959559	1.51034	3.97636	5e-05	0.00026084
ENSG00000009780	ENST00000373954///ENST00000419687///ENST00000530324///ENST00000234549///ENST00000373949///ENST00000010299///ENST00000446647	199870	FAM76A|family with sequence similarity 76, member A	chr1:27725978-27763122				8.45657	9.50785	0.169047	0.45925	0.629957
ENSG00000009790	ENST00000400959///ENST00000367025///ENST00000478359///ENST00000479796///ENST00000468672///ENST00000367026///ENST00000367024///ENST00000367023///ENST00000476050///ENST00000487271///ENST00000474496///ENST00000477431///ENST00000488702///ENST00000471368///ENST00000460314///ENST00000467830	80342	TRAF3IP3|TRAF3 interacting protein 3	chr1:209756031-209784559				0.0565264	0.0249217	-1.18152	1	1
ENSG00000009830	ENST00000261534///ENST00000554767///ENST00000452340///ENST00000602717///ENST00000556394///ENST00000555710///ENST00000556446///ENST00000556171///ENST00000555134///ENST00000554564///ENST00000554884///ENST00000553880///ENST00000557675///ENST00000556404///ENST00000556851///ENST00000557289///ENST00000553863///ENST00000556326///ENST00000555675///ENST00000554948///ENST00000556880///ENST00000555788///ENS…	29954	POMT2|protein-O-mannosyltransferase 2	chr14:77274955-77331597				52.5144	32.8743	-0.675755	0.0098	0.0292096
ENSG00000009844	ENST00000367630///ENST00000367621///ENST00000491881///ENST00000452973///ENST00000620996	51534	VTA1|vesicle (multivesicular body) trafficking 1	chr6:142147161-142224689				77.3463	67.3169	-0.200365	0.1126	0.221633
ENSG00000009950	ENST00000345114///ENST00000414749///ENST00000429400///ENST00000313375///ENST00000354613///ENST00000434326///ENST00000467221///ENST00000476404///ENST00000453275///ENST00000488212///ENST00000456640	51085	MLXIPL|MLX interacting protein-like	chr7:73593193-73624543	GO:0003677|DNA binding|///GO:0006357|regulation of transcription from RNA polymerase II promoter|///GO:0005634|nucleus|///GO:0006355|regulation of transcription, DNA-templated|///GO:0003700|transcription factor activity, sequence-specific DNA binding|///GO:0006351|transcription, DNA-templated|///GO:0005737|cytoplasm|///GO:0005667|transcription factor complex|///GO:0045944|positive regulation of t…			1.20135	2.29969	0.936785	0.00095	0.00380465
ENSG00000009954	ENST00000339594///ENST00000404251///ENST00000466844	9031	BAZ1B|bromodomain adjacent to zinc finger domain, 1B	chr7:73440397-73522278				56.3279	36.8568	-0.611921	5e-05	0.00026084
ENSG00000010017	ENST00000011619///ENST00000469916	10048	RANBP9|RAN binding protein 9	chr6:13615326-13711564				51.6765	42.7963	-0.272021	0.16715	0.300124
ENSG00000010030	ENST00000339796///ENST00000627426///ENST00000340181///ENST00000373737///ENST00000373738///ENST00000620358///ENST00000615781///ENST00000538992	51513	ETV7|ets variant 7	chr6:36354090-36491143				0.0768468	0.512401	2.73722	0.01195	0.0346705
ENSG00000010072	ENST00000366644///ENST00000469904///ENST00000492437///ENST00000008440///ENST00000295050///ENST00000391858	83932	SPRTN|SprT-like N-terminal domain	chr1:231332752-231355023				11.726	11.1421	-0.0736858	0.7886	0.879827
ENSG00000010165	ENST00000485629///ENST00000362019///ENST00000367737///ENST00000361735///ENST00000478330///ENST00000466643///ENST00000476386	51603	METTL13|methyltransferase like 13	chr1:171781663-171814023				51.5468	49.4849	-0.0588948	0.7112	0.832248
ENSG00000010219	ENST00000543431///ENST00000539701///ENST00000537719///ENST00000539309///ENST00000538520///ENST00000539490///ENST00000540757///ENST00000536157///ENST00000542905///ENST00000536645///ENST00000540644///ENST00000545571///ENST00000536137///ENST00000541024///ENST00000544671///ENST00000544050///ENST00000010132	8798	DYRK4|dual-specificity tyrosine-(Y)-phosphorylation regulated kinase 4	chr12:4562203-4851927	GO:0004672|protein kinase activity|///GO:0005524|ATP binding|///GO:0006468|protein phosphorylation|///GO:0046872|metal ion binding|///GO:0005634|nucleus|///GO:0005737|cytoplasm|///GO:0043231|intracellular membrane-bounded organelle|///GO:0018108|peptidyl-tyrosine phosphorylation|///GO:0004674|protein serine/threonine kinase activity|///GO:0004713|protein tyrosine kinase activity|///GO:0005515|pro…			0.608136	8.0172	3.72063	5e-05	0.00026084
ENSG00000010244	ENST00000394670///ENST00000321233///ENST00000394673///ENST00000579634///ENST00000580759///ENST00000342555///ENST00000577908///ENST00000394679///ENST00000582165///ENST00000577324///ENST00000578918///ENST00000581531///ENST00000579416///ENST00000582705///ENST00000584696///ENST00000579810///ENST00000584416	7756	ZNF207|zinc finger protein 207	chr17:32266175-32381886				118.274	90.2861	-0.389558	0.00135	0.00518252
ENSG00000010256	ENST00000471189///ENST00000203407///ENST00000480561///ENST00000415995///ENST00000460105///ENST00000472438///ENST00000412343///ENST00000467690///ENST00000463708///ENST00000493806	7384	UQCRC1|ubiquinol-cytochrome c reductase core protein I	chr3:48599001-48610976				156.458	121.03	-0.370419	0.0089	0.0268573
ENSG00000010270	ENST00000009041///ENST00000434197///ENST00000471550///ENST00000396013///ENST00000440144///ENST00000453225///ENST00000429075	83930	STARD3NL|STARD3 N-terminal like	chr7:38178221-38230671				22.2505	26.1554	0.233274	0.0704	0.152177
ENSG00000010278	ENST00000382518///ENST00000543916///ENST00000536586///ENST00000382519///ENST00000546073///ENST00000538834///ENST00000538418///ENST00000009180///ENST00000382515///ENST00000481267///ENST00000540891///ENST00000610354///ENST00000617871	928	CD9|CD9 molecule	chr12:6199714-6238271				285.843	230.503	-0.310436	0.0043	0.0142482
ENSG00000010282	ENST00000490003///ENST00000466007///ENST00000426666///ENST00000310417///ENST00000441594///ENST00000480939///ENST00000457462///ENST00000416756///ENST00000455195///ENST00000417472///ENST00000442469///ENST00000497000	57467	HHATL|hedgehog acyltransferase-like	chr3:42692662-43060211				0	0.08412	18.6778	1	1
ENSG00000010292	ENST00000541399///ENST00000315579///ENST00000539714///ENST00000536538///ENST00000382457///ENST00000539084///ENST00000545732///ENST00000536090///ENST00000542472///ENST00000538600///ENST00000542492///ENST00000535804///ENST00000539885	9918	NCAPD2|non-SMC condensin I complex, subunit D2	chr12:6491885-6531955				118.033	20.9819	-2.49197	5e-05	0.00026084
ENSG00000010295	ENST00000472558///ENST00000471408///ENST00000465801///ENST00000336604///ENST00000487279///ENST00000396840///ENST00000356896///ENST00000488007///ENST00000396830///ENST00000619571///ENST00000436152///ENST00000615885	25900	IFFO1|intermediate filament family orphan 1	chr12:6538374-6556083				0.0393202	0.0463511	0.237331	1	1
ENSG00000010310	ENST00000590918///ENST00000263281///ENST00000304207///ENST00000585889///ENST00000591322///ENST00000588816///ENST00000591224///ENST00000593127	2696	GIPR|gastric inhibitory polypeptide receptor	chr19:45668243-45683724				0.158064	1.23888	2.97046	5e-05	0.00026084
ENSG00000010318	ENST00000327906///ENST00000473145///ENST00000482327///ENST00000347025///ENST00000472337///ENST00000461861///ENST00000498509///ENST00000465863///ENST00000459935///ENST00000614886///ENST00000615126///ENST00000620464	51533	PHF7|PHD finger protein 7	chr3:52410560-52423641	GO:0008270|zinc ion binding|///GO:0005634|nucleus|///GO:0005815|microtubule organizing center|///GO:0005654|nucleoplasm|///GO:0005515|protein binding|			2.84284	5.68631	1.00016	5e-05	0.00026084
ENSG00000010319	ENST00000231721///ENST00000465657///ENST00000475739	56920	SEMA3G|sema domain, immunoglobulin domain (Ig), short basic domain, secreted, (semaphorin) 3G	chr3:52433052-52445085				0.0744845	0.10704	0.523131	1	1
ENSG00000010322	ENST00000479054///ENST00000488380///ENST00000420808///ENST00000489895///ENST00000488157///ENST00000490425///ENST00000464280///ENST00000481211///ENST00000474188///ENST00000485765///ENST00000460759///ENST00000488243///ENST00000467594///ENST00000345716	11188	NISCH|nischarin	chr3:52455117-52493071	GO:0055037|recycling endosome|///GO:0016020|membrane|///GO:0005886|plasma membrane|///GO:0006915|apoptotic process|///GO:0005829|cytosol|///GO:0035091|phosphatidylinositol binding|///GO:0005769|early endosome|///GO:0005515|protein binding|///GO:0042802|identical protein binding|///GO:0030036|actin cytoskeleton organization|///GO:0030336|negative regulation of cell migration|///GO:0016601|Rac prot…			15.4253	16.7156	0.115902	0.62645	0.772626
ENSG00000010327	ENST00000321725///ENST00000481607///ENST00000479355///ENST00000484850///ENST00000461325///ENST00000481626///ENST00000462741///ENST00000462681///ENST00000469989	23166	STAB1|stabilin 1	chr3:52495337-52770949				0.0586105	0.0267322	-1.13258	1	1
ENSG00000010361	ENST00000525130///ENST00000529634///ENST00000528094///ENST00000533418///ENST00000525370///ENST00000313777///ENST00000377092///ENST00000534138///ENST00000527973///ENST00000528043///ENST00000531017///ENST00000527585///ENST00000534008///ENST00000529302///ENST00000526575///ENST00000525800///ENST00000527111///ENST00000526435	80199	FUZ|fuzzy planar cell polarity protein	chr19:49766967-49817376				11.2599	10.5448	-0.0946569	0.8447	0.910697
ENSG00000010379	ENST00000343164///ENST00000539668///ENST00000542379///ENST00000543722///ENST00000542947///ENST00000546319///ENST00000536842///ENST00000534887///ENST00000539260///ENST00000542272///ENST00000436453///ENST00000445055	6540	SLC6A13|solute carrier family 6 (neurotransmitter transporter), member 13	chr12:220620-262873				0	0.0113107	18.6778	1	1
ENSG00000010404	ENST00000340855///ENST00000466323///ENST00000370441///ENST00000490775///ENST00000464251///ENST00000466019///ENST00000428056///ENST00000521702	3423	IDS|iduronate 2-sulfatase	chrX:149476989-149550510				63.9169	41.3694	-0.627634	0.00195	0.00714236
ENSG00000010438	ENST00000361005///ENST00000468152///ENST00000457896///ENST00000379405///ENST00000477653///ENST00000495682///ENST00000429677///ENST00000342836	5646	PRSS3|protease, serine, 3	chr9:33750465-33920404				0	0	0	1	1
ENSG00000010539	ENST00000396868///ENST00000414144///ENST00000396871///ENST00000431561///ENST00000396870///ENST00000575285///ENST00000575948///ENST00000575630///ENST00000575617///ENST00000577015	7752	ZNF200|zinc finger protein 200	chr16:3188211-3236221				11.8209	10.3894	-0.186226	0.2376	0.389572
ENSG00000010610	ENST00000535707///ENST00000011653///ENST00000536610///ENST00000544344///ENST00000541982///ENST00000538827///ENST00000437800///ENST00000535466///ENST00000536590///ENST00000539492///ENST00000536563///ENST00000543755	920	CD4|CD4 molecule	chr12:6786857-6820808				0.0351358	0.0979049	1.47844	1	1
ENSG00000010626	ENST00000433346///ENST00000449039///ENST00000007969///ENST00000451681///ENST00000428946///ENST00000323702///ENST00000457146///ENST00000486401///ENST00000431207///ENST00000443597///ENST00000415834///ENST00000436789///ENST00000429740///ENST00000472633///ENST00000622489	10233	LRRC23|leucine rich repeat containing 23	chr12:6867118-6923698				6.10596	3.6462	-0.743826	0.34895	0.517987
ENSG00000010671	ENST00000308731///ENST00000470069///ENST00000488970///ENST00000478995///ENST00000470329///ENST00000464006///ENST00000464567///ENST00000621635///ENST00000372880///ENST00000618050	695	BTK|Bruton agammaglobulinemia tyrosine kinase	chrX:101349446-101390796				0.0221553	0.380716	4.10299	0.04835	0.111799
ENSG00000010704	ENST00000397022///ENST00000353147///ENST00000352392///ENST00000349999///ENST00000317896///ENST00000483782///ENST00000357618///ENST00000470149///ENST00000336625///ENST00000486147///ENST00000461397///ENST00000488199///ENST00000309234///ENST00000485729	3077	HFE|hemochromatosis	chr6:26043226-26123926	GO:0005615|extracellular space|///GO:0006955|immune response|///GO:0055037|recycling endosome|///GO:0005886|plasma membrane|///GO:0005102|receptor binding|///GO:0005887|integral component of plasma membrane|///GO:0010862|positive regulation of pathway-restricted SMAD protein phosphorylation|///GO:0006879|cellular iron ion homeostasis|///GO:0048471|perinuclear region of cytoplasm|///GO:0005769|ear…			1.32823	2.54646	0.938985	0.13645	0.257802
ENSG00000010803	ENST00000326197///ENST00000372595///ENST00000337495///ENST00000372597///ENST00000372596///ENST00000472037///ENST00000456518///ENST00000460215///ENST00000498793///ENST00000489421///ENST00000482530///ENST00000488592///ENST00000397171///ENST00000397174///ENST00000361191///ENST00000361705///ENST00000402904	22955	SCMH1|sex comb on midleg homolog 1 (Drosophila)	chr1:41014589-41242154				10.9407	7.31169	-0.581428	0.03055	0.0763789
ENSG00000010810	ENST00000368682///ENST00000354650///ENST00000229471///ENST00000368667///ENST00000368678///ENST00000491885///ENST00000467921///ENST00000471959///ENST00000496864///ENST00000476769///ENST00000495935///ENST00000467899///ENST00000495927///ENST00000523322///ENST00000462856///ENST00000520518///ENST00000517419///ENST00000518295///ENST00000523238///ENST00000524310///ENST00000523574///ENST00000518630///ENS…	2534	FYN|FYN proto-oncogene, Src family tyrosine kinase	chr6:111660331-111873452				2.4191	7.73837	1.67756	5e-05	0.00026084
ENSG00000010818	ENST00000367604///ENST00000012134///ENST00000474532///ENST00000367603	3097	HIVEP2|human immunodeficiency virus type I enhancer binding protein 2	chr6:142748442-142945201				3.25803	2.20488	-0.563297	0.0701	0.151729
ENSG00000010932	ENST00000433267///ENST00000367750///ENST00000469112///ENST00000354841///ENST00000459868///ENST00000472893///ENST00000469711///ENST00000402921///ENST00000617670	2326	FMO1|flavin containing monooxygenase 1	chr1:171247579-171285978				0.203773	0.127891	-0.672044	1	1
ENSG00000011007	ENST00000418390///ENST00000609199///ENST00000487554///ENST00000613537	6924	TCEB3|transcription elongation factor B (SIII), polypeptide 3 (110kDa, elongin A)	chr1:23743154-23778287				30.9615	30.5989	-0.0169952	0.89645	0.93891
ENSG00000011009	ENST00000374514///ENST00000420982///ENST00000374505///ENST00000495365///ENST00000374503///ENST00000374502///ENST00000492577///ENST00000421070///ENST00000374501///ENST00000472213	11313	LYPLA2|lysophospholipase II	chr1:23790969-23795539				18.4593	25.0629	0.4412	0.0026	0.00921213
ENSG00000011021	ENST00000346436///ENST00000376497///ENST00000376496///ENST00000376490///ENST00000376491///ENST00000376492///ENST00000494028///ENST00000312413	1185	CLCN6|chloride channel, voltage-sensitive 6	chr1:11761786-11848345				4.70358	4.63978	-0.0197018	0.94525	0.965659
ENSG00000011028	ENST00000303375///ENST00000584265///ENST00000584682///ENST00000583597///ENST00000579432///ENST00000446119///ENST00000580916	9902	MRC2|mannose receptor, C type 2	chr17:62626030-62693597				0.486725	1.42498	1.54976	0.00035	0.00155594
ENSG00000011052	ENST00000393193///ENST00000376392///ENST00000555572	654364	NME1-NME2|NME1-NME2 readthrough	chr17:51153535-51171747	GO:0005524|ATP binding|///GO:0046872|metal ion binding|///GO:0005634|nucleus|///GO:0006355|regulation of transcription, DNA-templated|///GO:0003700|transcription factor activity, sequence-specific DNA binding|///GO:0006351|transcription, DNA-templated|///GO:0005737|cytoplasm|///GO:0005622|intracellular|///GO:0045944|positive regulation of transcription from RNA polymerase II promoter|///GO:000582…			18.7632	10.4069	-0.850374	0.4435	0.614751
ENSG00000011083	ENST00000230671///ENST00000524041///ENST00000513403	6534	SLC6A7|solute carrier family 6 (neurotransmitter transporter), member 7	chr5:150189956-150290291				0	0.00521922	18.6778	1	1
ENSG00000011105	ENST00000444315///ENST00000011898///ENST00000539631///ENST00000407263///ENST00000431374///ENST00000492305///ENST00000537971	10867	TSPAN9|tetraspanin 9	chr12:3077354-3286564				5.0416	7.01451	0.476462	0.0946	0.193054
ENSG00000011114	ENST00000355125///ENST00000334746///ENST00000554565///ENST00000553975///ENST00000554644///ENST00000298896///ENST00000555525///ENST00000554968	55727	BTBD7|BTB (POZ) domain containing 7	chr14:93237549-93333092				22.359	12.408	-0.849593	0.0041	0.0136732
ENSG00000011132	ENST00000588984///ENST00000590064///ENST00000316757///ENST00000591678///ENST00000586991///ENST00000592826///ENST00000590238///ENST00000589934	9546	APBA3|amyloid beta (A4) precursor protein-binding, family A, member 3	chr19:3750818-3761699				1.90909	0.952025	-1.00381	0.00195	0.00714236
ENSG00000011143	ENST00000393119///ENST00000313863///ENST00000537529///ENST00000393120///ENST00000583577///ENST00000577315///ENST00000577824///ENST00000585134///ENST00000579358///ENST00000581761///ENST00000580127///ENST00000578789///ENST00000581180	54903	MKS1|Meckel syndrome, type 1	chr17:58205436-58268518				32.1765	22.3387	-0.526462	0.0048	0.0156696
ENSG00000011198	ENST00000486764///ENST00000458276///ENST00000456453///ENST00000013894///ENST00000454293///ENST00000413300///ENST00000463153	51099	ABHD5|abhydrolase domain containing 5	chr3:43286511-43734371				35.2789	24.087	-0.550552	0.043	0.101423
ENSG00000011201	ENST00000619786///ENST00000488294///ENST00000481896///ENST00000262648	3730	ANOS1|anosmin 1	chrX:8528873-8732187				1.55077	5.86037	1.918	5e-05	0.00026084
ENSG00000011243	ENST00000397410///ENST00000609519///ENST00000595465///ENST00000594594///ENST00000593845///ENST00000600065///ENST00000595087///ENST00000595879///ENST00000596750///ENST00000594893///ENST00000598292///ENST00000595136///ENST00000599137///ENST00000599488///ENST00000596213///ENST00000597994///ENST00000596195///ENST00000600247///ENST00000595067///ENST00000601147	26993	AKAP8L|A kinase (PRKA) anchor protein 8-like	chr19:15353384-15419141				65.4084	72.0192	0.138907	0.4629	0.633042
ENSG00000011258	ENST00000586178///ENST00000405860///ENST00000586898///ENST00000591270///ENST00000593259///ENST00000415868///ENST00000376381	54799	MBTD1|mbt domain containing 1	chr17:51177424-51260163	GO:0008270|zinc ion binding|///GO:0005634|nucleus|///GO:0006355|regulation of transcription, DNA-templated|///GO:0006351|transcription, DNA-templated|///GO:0016568|chromatin modification|///GO:0048706|embryonic skeletal system development|			17.3755	11.8626	-0.550633	5e-05	0.00026084
ENSG00000011260	ENST00000225298///ENST00000508506///ENST00000583725///ENST00000583205///ENST00000579261///ENST00000582832///ENST00000582150	51096	UTP18|UTP18 small subunit (SSU) processome component homolog (yeast)	chr17:51260527-51297936				148.597	87.3101	-0.767184	5e-05	0.00026084
ENSG00000011275	ENST00000425013///ENST00000389902///ENST00000389900///ENST00000469375///ENST00000484458///ENST00000479541///ENST00000411812///ENST00000416985///ENST00000476345	54476	RNF216|ring finger protein 216	chr7:5620046-5781739				20.9515	23.7173	0.178887	0.2746	0.432505
ENSG00000011295	ENST00000261647///ENST00000466729///ENST00000475723///ENST00000583704///ENST00000497842///ENST00000470399///ENST00000481107///ENST00000465567///ENST00000470649///ENST00000578103	54902	TTC19|tetratricopeptide repeat domain 19	chr17:15976559-16353656				41.5281	32.624	-0.348154	0.07275	0.15602
ENSG00000011304	ENST00000356948///ENST00000635647///ENST00000590887///ENST00000349038///ENST00000586481///ENST00000586944///ENST00000394601///ENST00000589575///ENST00000587191///ENST00000587094///ENST00000350092///ENST00000592113///ENST00000585535///ENST00000621737///ENST00000585956///ENST00000587136///ENST00000592804///ENST00000585932///ENST00000589883///ENST00000585856///ENST00000627714	5725	PTBP1|polypyrimidine tract binding protein 1	chr19:797074-812327				313.214	169.498	-0.885879	0.0005	0.0021446
ENSG00000011332	ENST00000420980///ENST00000416611///ENST00000418517///ENST00000414789///ENST00000355526///ENST00000473716///ENST00000456296///ENST00000472656///ENST00000471976///ENST00000494031///ENST00000488378///ENST00000438060///ENST00000475938///ENST00000438365///ENST00000586624///ENST00000412732///ENST00000614244	8193	DPF1|D4, zinc and double PHD fingers family 1	chr19:38211005-38229714				2.02951	1.14374	-0.827374	0.00385	0.0129472
ENSG00000011347	ENST00000263846///ENST00000540677///ENST00000539246///ENST00000539468///ENST00000539008///ENST00000542836///ENST00000542670///ENST00000535826///ENST00000540831///ENST00000545053	9066	SYT7|synaptotagmin VII	chr11:61515312-61581148	GO:0005509|calcium ion binding|///GO:0016021|integral component of membrane|///GO:0005544|calcium-dependent phospholipid binding|///GO:0005886|plasma membrane|///GO:0030054|cell junction|///GO:0019905|syntaxin binding|///GO:0017158|regulation of calcium ion-dependent exocytosis|///GO:0016079|synaptic vesicle exocytosis|///GO:0030276|clathrin binding|///GO:0048791|calcium ion-dependent exocytosis …			9.96096	13.3561	0.423142	0.00775	0.0238226
ENSG00000011376	ENST00000265537///ENST00000415258///ENST00000431023///ENST00000414984///ENST00000430399///ENST00000467936///ENST00000485461///ENST00000474585	23395	LARS2|leucyl-tRNA synthetase 2, mitochondrial	chr3:45388505-45549421				13.6659	8.73327	-0.645986	0.0101	0.0299582
ENSG00000011405	ENST00000531428///ENST00000265970///ENST00000533645///ENST00000532035///ENST00000503729	5286	PIK3C2A|phosphatidylinositol-4-phosphate 3-kinase, catalytic subunit type 2 alpha	chr11:17074388-17207983				15.22	9.83058	-0.630619	0.0244	0.0631333
ENSG00000011422	ENST00000339082///ENST00000593447///ENST00000601723///ENST00000340093///ENST00000221264///ENST00000595038///ENST00000594364///ENST00000593714///ENST00000599892///ENST00000597107///ENST00000602141///ENST00000593939///ENST00000593396///ENST00000598875///ENST00000599546///ENST00000601876	5329	PLAUR|plasminogen activator, urokinase receptor	chr19:43646094-43670547	GO:0016021|integral component of membrane|///GO:0007165|signal transduction|///GO:0005886|plasma membrane|///GO:2001243|negative regulation of intrinsic apoptotic signaling pathway|///GO:0031225|anchored component of membrane|///GO:0005789|endoplasmic reticulum membrane|///GO:0043066|negative regulation of apoptotic process|///GO:0005102|receptor binding|///GO:0004872|receptor activity|///GO:0019…			3.26558	3.15759	-0.0485169	0.8042	0.888598
ENSG00000011426	ENST00000265748///ENST00000396068///ENST00000424865///ENST00000418118///ENST00000460598///ENST00000429082///ENST00000441696///ENST00000452877///ENST00000495714///ENST00000428612///ENST00000446635///ENST00000457743///ENST00000491782	54443	ANLN|anillin actin binding protein	chr7:36324220-36453791				129.299	60.0074	-1.10749	5e-05	0.00026084
ENSG00000011451	ENST00000263381///ENST00000599910///ENST00000599686///ENST00000600632///ENST00000595214///ENST00000596159///ENST00000545156///ENST00000389282	58525	WIZ|widely interspaced zinc finger motifs	chr19:15419979-15449951				6.75026	4.41317	-0.613128	5e-05	0.00026084
ENSG00000011454	ENST00000456584///ENST00000373647///ENST00000459903///ENST00000317419///ENST00000402311///ENST00000426918///ENST00000485090///ENST00000493854///ENST00000475607///ENST00000468760///ENST00000474707///ENST00000480054///ENST00000616002	2844///23637	RABGAP1|G protein-coupled receptor 21///RABGAP1|RAB GTPase activating protein 1	chr9:122940832-123104866				61.1776	25.4329	-1.26631	5e-05	0.00026084
ENSG00000011465	ENST00000052754///ENST00000548218///ENST00000552962///ENST00000441303///ENST00000420120///ENST00000547568///ENST00000546391///ENST00000456569///ENST00000550758///ENST00000547937///ENST00000552145///ENST00000550563///ENST00000549513///ENST00000546370///ENST00000546745///ENST00000550099///ENST00000551354///ENST00000548768///ENST00000425043///ENST00000393155	1634	DCN|decorin	chr12:91140483-91183123				0	0.841875	18.6778	5e-05	0.00026084
ENSG00000011478	ENST00000012049///ENST00000366382///ENST00000591606///ENST00000592769	54814	QPCTL|glutaminyl-peptide cyclotransferase-like	chr19:45687453-45703989				6.45594	3.87145	-0.737755	0.129	0.246717
ENSG00000011485	ENST00000012443///ENST00000478046///ENST00000391919///ENST00000467902///ENST00000527193///ENST00000487483///ENST00000532058///ENST00000486994///ENST00000467502///ENST00000493347///ENST00000595055///ENST00000491003///ENST00000492109///ENST00000525507///ENST00000527623	5536	PPP5C|protein phosphatase 5, catalytic subunit	chr19:46346993-46392981				133.041	74.9048	-0.828737	5e-05	0.00026084
ENSG00000011523	ENST00000475851///ENST00000377990///ENST00000260569///ENST00000497039///ENST00000537589	23177	CEP68|centrosomal protein 68kDa	chr2:65056365-65130106	GO:0005634|nucleus|///GO:0005737|cytoplasm|///GO:0005815|microtubule organizing center|///GO:0005813|centrosome|///GO:0005654|nucleoplasm|///GO:0030054|cell junction|///GO:0019901|protein kinase binding|///GO:0019904|protein domain specific binding|///GO:0005515|protein binding|///GO:0051297|centrosome organization|///GO:0033365|protein localization to organelle|///GO:0010457|centriole-centriole …			3.98529	2.91816	-0.449628	0.2953	0.45744
ENSG00000011566	ENST00000263881///ENST00000437545///ENST00000341681///ENST00000479708///ENST00000475457///ENST00000495648///ENST00000497566///ENST00000474502///ENST00000465701///ENST00000414968///ENST00000429397///ENST00000437968///ENST00000484274	8491	MAP4K3|mitogen-activated protein kinase kinase kinase kinase 3	chr2:39249265-39717963				107.13	103.565	-0.0488341	0.936	0.960507
ENSG00000011590	ENST00000392197///ENST00000442282///ENST00000426659///ENST00000451726///ENST00000481182///ENST00000262630	27033	ZBTB32|zinc finger and BTB domain containing 32	chr19:35704526-35717038	GO:0003677|DNA binding|///GO:0008270|zinc ion binding|///GO:0046872|metal ion binding|///GO:0005634|nucleus|///GO:0000122|negative regulation of transcription from RNA polymerase II promoter|///GO:0006366|transcription from RNA polymerase II promoter|///GO:0005654|nucleoplasm|///GO:0006281|DNA repair|///GO:0005515|protein binding|///GO:0036297|interstrand cross-link repair|///GO:0019985|translesi…			0.588951	0.207073	-1.50801	0.02785	0.0706632
ENSG00000011600	ENST00000587837///ENST00000424586///ENST00000585901///ENST00000544690///ENST00000262629///ENST00000586946///ENST00000588439///ENST00000589517///ENST00000585626	7305	TYROBP|TYRO protein tyrosine kinase binding protein	chr19:35904400-35908295				0	0	0	1	1
ENSG00000011638	ENST00000573487///ENST00000233047///ENST00000572258///ENST00000574092///ENST00000261388///ENST00000451578///ENST00000572599///ENST00000577162///ENST00000573688	57146	TMEM159|transmembrane protein 159	chr16:20933110-21180616				23.8373	58.7079	1.30033	5e-05	0.00026084
ENSG00000011677	ENST00000370314///ENST00000535043///ENST00000497894///ENST00000417858	2556	GABRA3|gamma-aminobutyric acid (GABA) A receptor, alpha 3	chrX:152138882-152451358				0	0.30128	18.6778	5e-05	0.00026084
ENSG00000012048	ENST00000357654///ENST00000352993///ENST00000468300///ENST00000586385///ENST00000591534///ENST00000591849///ENST00000493795///ENST00000471181///ENST00000461221///ENST00000491747///ENST00000484087///ENST00000478531///ENST00000493919///ENST00000472490///ENST00000621897///ENST00000487825///ENST00000461574///ENST00000354071///ENST00000634433///ENST00000412061///ENST00000470026///ENST00000477152///ENS…	672	BRCA1|breast cancer 1, early onset	chr17:43044294-43125483				32.9026	8.00261	-2.03966	5e-05	0.00026084
ENSG00000012061	ENST00000300853///ENST00000423698///ENST00000588738///ENST00000340192///ENST00000590701///ENST00000591636///ENST00000589165///ENST00000013807///ENST00000592410///ENST00000592444///ENST00000587888///ENST00000589381///ENST00000592083///ENST00000592905///ENST00000592023///ENST00000588300///ENST00000589214	2067	ERCC1|excision repair cross-complementation group 1	chr19:45379633-45478828				36.6712	25.3883	-0.53048	0.10655	0.212278
ENSG00000012124	ENST00000598537///ENST00000601414///ENST00000595419///ENST00000599717///ENST00000600131///ENST00000598138///ENST00000599799///ENST00000595780///ENST00000602224///ENST00000597916///ENST00000596492///ENST00000600905///ENST00000593867///ENST00000601732///ENST00000598028///ENST00000600424///ENST00000599811///ENST00000598815///ENST00000601769///ENST00000536635///ENST00000085219///ENST00000594954///ENS…	933	CD22|CD22 molecule	chr19:35319260-35347355				0.957041	1.07367	0.165897	0.56025	0.720342
ENSG00000012171	ENST00000621029///ENST00000619119///ENST00000616701///ENST00000612509///ENST00000433753///ENST00000611067///ENST00000441915///ENST00000456560///ENST00000439487///ENST00000434030///ENST00000456210///ENST00000418576///ENST00000419007///ENST00000416295///ENST00000618865///ENST00000611418	7869	SEMA3B|sema domain, immunoglobulin domain (Ig), short basic domain, secreted, (semaphorin) 3B	chr3:50267557-50277546				15.1556	32.6218	1.10599	5e-05	0.00026084
ENSG00000012174	ENST00000465888///ENST00000379484///ENST00000365779	51360	MBTPS2|membrane-bound transcription factor peptidase, site 2	chrX:21839635-21885424				13.1116	10.0987	-0.376676	0.0044	0.0145256
ENSG00000012211	ENST00000540849///ENST00000599218///ENST00000453382///ENST00000614014///ENST00000432913///ENST00000376310///ENST00000376317///ENST00000611313	4007	PRICKLE3|prickle homolog 3	chrX:49175263-49186528				3.778	2.9562	-0.353881	0.094	0.192049
ENSG00000012223	ENST00000231751///ENST00000426532///ENST00000417439///ENST00000443496///ENST00000493056///ENST00000478874///ENST00000462667///ENST00000431944///ENST00000498301	4057	LTF|lactotransferrin	chr3:46435644-46485234				0	0.53879	18.6778	5e-05	0.00026084
ENSG00000012232	ENST00000522725///ENST00000523149///ENST00000519288///ENST00000520940///ENST00000454906///ENST00000220562///ENST00000519886///ENST00000518223///ENST00000521532///ENST00000522698///ENST00000521473///ENST00000517738///ENST00000523271///ENST00000520679	2137	EXTL3|exostosin-like glycosyltransferase 3	chr8:28600468-28755599				6.5629	5.51227	-0.251686	0.3621	0.532599
ENSG00000012504	ENST00000548884///ENST00000392986///ENST00000321046///ENST00000549996///ENST00000546380///ENST00000548621///ENST00000551379///ENST00000188403///ENST00000551184	9971	NR1H4|nuclear receptor subfamily 1, group H, member 4	chr12:100473707-100564413				0	0.0212713	18.6778	1	1
ENSG00000012660	ENST00000304434///ENST00000485336///ENST00000465983///ENST00000486973///ENST00000370913///ENST00000370918///ENST00000542638	60481	ELOVL5|ELOVL fatty acid elongase 5	chr6:53267397-53349179				86.9386	33.6225	-1.37057	5e-05	0.00026084
ENSG00000012779	ENST00000374391///ENST00000483623///ENST00000475300///ENST00000493336///ENST00000481117///ENST00000498461///ENST00000542434///ENST00000612635	240	ALOX5|arachidonate 5-lipoxygenase	chr10:45374175-45453121				0.102176	1.22227	3.58043	0.0002	0.000933714
ENSG00000012817	ENST00000469599///ENST00000317961///ENST00000382806///ENST00000492117///ENST00000440077///ENST00000415360///ENST00000485154///ENST00000478891///ENST00000447300///ENST00000541639	8284	KDM5D|lysine (K)-specific demethylase 5D	chrY:19703864-19744939				0	0	0	1	1
ENSG00000012822	ENST00000262059///ENST00000546443///ENST00000430117///ENST00000548263///ENST00000550804///ENST00000549935///ENST00000549613///ENST00000552282///ENST00000547988///ENST00000551900///ENST00000546619///ENST00000547949///ENST00000553154///ENST00000549784///ENST00000549173///ENST00000548177///ENST00000552623///ENST00000549349///ENST00000549688///ENST00000547885///ENST00000548431///ENST00000546774	57658	CALCOCO1|calcium binding and coiled-coil domain 1	chr12:53708516-53727745	GO:0005634|nucleus|///GO:0006351|transcription, DNA-templated|///GO:0005737|cytoplasm|///GO:0043565|sequence-specific DNA binding|///GO:0008022|protein C-terminus binding|///GO:0043231|intracellular membrane-bounded organelle|///GO:0007165|signal transduction|///GO:0044212|transcription regulatory region DNA binding|///GO:0016055|Wnt signaling pathway|///GO:0003713|transcription coactivator activ…			17.3305	38.3485	1.14585	5e-05	0.00026084
ENSG00000012963	ENST00000013070///ENST00000554232///ENST00000556871///ENST00000553674///ENST00000555113///ENST00000553857///ENST00000555329///ENST00000416753	55148	UBR7|ubiquitin protein ligase E3 component n-recognin 7 (putative)	chr14:93184950-93229215				75.9085	30.1735	-1.33098	5e-05	0.00026084
ENSG00000012983	ENST00000554990///ENST00000013125///ENST00000557124///ENST00000557210///ENST00000554091///ENST00000557578///ENST00000555216///ENST00000557390///ENST00000554066///ENST00000554273	11183	MAP4K5|mitogen-activated protein kinase kinase kinase kinase 5	chr14:50418500-50668331				30.3057	20.9877	-0.530041	0.01935	0.0520845
ENSG00000013016	ENST00000322054///ENST00000541626	30845	EHD3|EH-domain containing 3	chr2:31234336-31269447				0.987276	3.30793	1.7444	5e-05	0.00026084
ENSG00000013275	ENST00000157812///ENST00000593455///ENST00000455878///ENST00000601697///ENST00000596386///ENST00000601194	5704	PSMC4|proteasome 26S subunit, ATPase 4	chr19:39971004-39981441				138.566	99.8013	-0.473443	5e-05	0.00026084
ENSG00000013288	ENST00000285599///ENST00000504248///ENST00000505907///ENST00000504960///ENST00000510427	23324	MAN2B2|mannosidase, alpha, class 2B, member 2	chr4:6575174-6623362				11.0318	9.38766	-0.232829	0.624	0.770475
ENSG00000013293	ENST00000231706///ENST00000466168	57709	SLC7A14|solute carrier family 7, member 14	chr3:170418864-170860380				0.00673916	0.00391775	-0.782543	1	1
ENSG00000013297	ENST00000064724///ENST00000486975///ENST00000486429///ENST00000489485///ENST00000468358///ENST00000471373///ENST00000477531///ENST00000488989///ENST00000480067	5010	CLDN11|claudin 11	chr3:170418864-170860380				0.481434	0.690661	0.52064	0.11275	0.221862
ENSG00000013306	ENST00000225308///ENST00000591006///ENST00000377095///ENST00000590194///ENST00000586016///ENST00000592372///ENST00000593166///ENST00000537904///ENST00000588767///ENST00000588315///ENST00000585695///ENST00000588049///ENST00000585636///ENST00000586633///ENST00000592857///ENST00000591151///ENST00000585523	51629	SLC25A39|solute carrier family 25, member 39	chr17:44319624-44324870	GO:0016021|integral component of membrane|///GO:0006810|transport|///GO:0005743|mitochondrial inner membrane|///GO:0006783|heme biosynthetic process|///GO:0005739|mitochondrion|///GO:0055085|transmembrane transport|			70.7881	60.5424	-0.22556	0.07265	0.155908
ENSG00000013364	ENST00000563915///ENST00000357402///ENST00000566859///ENST00000563096///ENST00000566066///ENST00000562463///ENST00000563558///ENST00000565830///ENST00000569887///ENST00000565164///ENST00000570234///ENST00000566252///ENST00000566554///ENST00000569612///ENST00000563123///ENST00000570061///ENST00000568068///ENST00000395353///ENST00000629059	9961	MVP|major vault protein	chr16:29806105-29848039				22.8273	182.721	3.00081	0.0009	0.00362734
ENSG00000013374	ENST00000413040///ENST00000568733///ENST00000468404///ENST00000470229///ENST00000483358///ENST00000470316///ENST00000493588///ENST00000480907///ENST00000477666///ENST00000497987///ENST00000460712///ENST00000480714	51667	NUB1|negative regulator of ubiquitin-like proteins 1	chr7:151341698-151413354				44.3897	52.0605	0.229966	0.13975	0.26242
ENSG00000013375	ENST00000504780///ENST00000513973///ENST00000512866///ENST00000283977///ENST00000506587///ENST00000509219///ENST00000507404///ENST00000510258///ENST00000505470///ENST00000507554///ENST00000605602///ENST00000508748///ENST00000503094///ENST00000515333///ENST00000616566	5238	PGM3|phosphoglucomutase 3	chr6:83067665-83198932				66.8639	96.7689	0.533315	0.32235	0.488475
ENSG00000013392	ENST00000369724	112611	RWDD2A|RWD domain containing 2A	chr6:83067665-83198932				2.88599	6.39482	1.14784	0.00385	0.0129472
ENSG00000013441	ENST00000321356///ENST00000461981///ENST00000464454///ENST00000432425///ENST00000473565///ENST00000472679///ENST00000409769///ENST00000409403///ENST00000434813///ENST00000461326///ENST00000496205///ENST00000492793///ENST00000481641///ENST00000482590///ENST00000621181	1195	CLK1|CDC-like kinase 1	chr2:200853008-200864744				59.1512	67.9094	0.199203	0.21685	0.363844
ENSG00000013503	ENST00000228347///ENST00000539066///ENST00000549569///ENST00000549195	55703	POLR3B|polymerase (RNA) III (DNA directed) polypeptide B	chr12:106357657-106889316				7.28599	7.69062	0.0779741	0.6614	0.798871
ENSG00000013523	ENST00000251089///ENST00000557179///ENST00000555079///ENST00000556298///ENST00000554941///ENST00000557497	23357	ANGEL1|angel homolog 1 (Drosophila)	chr14:76762188-76826246				16.9871	18.8936	0.153457	0.44325	0.614578
ENSG00000013561	ENST00000511961///ENST00000506822///ENST00000513019///ENST00000394520///ENST00000514620///ENST00000502341///ENST00000506938///ENST00000394514///ENST00000512565///ENST00000515613///ENST00000507163///ENST00000506004///ENST00000507291///ENST00000394519///ENST00000356143///ENST00000347642	9604	RNF14|ring finger protein 14	chr5:141943584-141990291	GO:0008270|zinc ion binding|///GO:0004842|ubiquitin-protein transferase activity|///GO:0016567|protein ubiquitination|///GO:0005515|protein binding|///GO:0006357|regulation of transcription from RNA polymerase II promoter|///GO:0005634|nucleus|///GO:0006355|regulation of transcription, DNA-templated|///GO:0042787|protein ubiquitination involved in ubiquitin-dependent protein catabolic process|///…			54.7415	59.0728	0.109859	0.5214	0.686621
ENSG00000013563	ENST00000369807///ENST00000369808///ENST00000014935///ENST00000309585///ENST00000497242///ENST00000447892///ENST00000451865///ENST00000412184///ENST00000424626///ENST00000432135///ENST00000369809///ENST00000393638	1774	DNASE1L1|deoxyribonuclease I-like 1	chrX:154389954-154421726				9.23341	31.3007	1.76126	0.01415	0.0399956
ENSG00000013573	ENST00000542838///ENST00000542129///ENST00000228264///ENST00000438391///ENST00000435753///ENST00000540935///ENST00000539049///ENST00000536265///ENST00000415475///ENST00000545668///ENST00000350437///ENST00000535158///ENST00000543756///ENST00000542244///ENST00000535317///ENST00000544652///ENST00000538345///ENST00000542242///ENST00000543026///ENST00000545717///ENST00000536580///ENST00000539673///ENS…	1663	DDX11|DEAD/H (Asp-Glu-Ala-Asp/His) box helicase 11	chr12:31020762-31104791				32.3976	14.5041	-1.15942	5e-05	0.00026084
ENSG00000013583	ENST00000014930///ENST00000540916///ENST00000535636///ENST00000536942	50865	HEBP1|heme binding protein 1	chr12:12927725-13000273				31.5779	22.1148	-0.513905	0.0003	0.00135017
ENSG00000013588	ENST00000014914///ENST00000537783///ENST00000542056///ENST00000534831///ENST00000540125	9052	GPRC5A|G protein-coupled receptor, class C, group 5, member A	chr12:12890781-12917937				132.364	114.065	-0.214656	0.2532	0.407294
ENSG00000013619	ENST00000468306///ENST00000370401///ENST00000432680///ENST00000358892///ENST00000464149///ENST00000426613///ENST00000262858	10046	MAMLD1|mastermind-like domain containing 1	chrX:150361421-150514178				1.98224	4.32215	1.12462	0.00015	0.000719971
ENSG00000013725	ENST00000313421///ENST00000542254///ENST00000545105///ENST00000344931///ENST00000545320///ENST00000542157///ENST00000433107///ENST00000452451///ENST00000352009///ENST00000538288///ENST00000541964///ENST00000538611///ENST00000419282///ENST00000505761	923	CD6|CD6 molecule	chr11:60971679-61020377	GO:0016020|membrane|///GO:0007155|cell adhesion|///GO:0005044|scavenger receptor activity|///GO:0006898|receptor-mediated endocytosis|///GO:0005887|integral component of plasma membrane|///GO:0005515|protein binding|///GO:0016021|integral component of membrane|			0.0300237	0.0741881	1.30509	1	1
ENSG00000013810	ENST00000485989///ENST00000484651///ENST00000467746///ENST00000313288///ENST00000493975///ENST00000458173///ENST00000470136///ENST00000466077///ENST00000470808///ENST00000404054///ENST00000484264///ENST00000612220///ENST00000617535	10460	TACC3|transforming, acidic coiled-coil containing protein 3	chr4:1721489-1745176	GO:0000226|microtubule cytoskeleton organization|///GO:0015630|microtubule cytoskeleton|///GO:0008283|cell proliferation|///GO:0021987|cerebral cortex development|///GO:0005737|cytoplasm|///GO:0005813|centrosome|///GO:0005515|protein binding|///GO:0019904|protein domain specific binding|///GO:0030953|astral microtubule organization|///GO:0051726|regulation of cell cycle|///GO:0030097|hemopoiesis|…			75.2631	42.9655	-0.808766	5e-05	0.00026084
ENSG00000014123	ENST00000461673///ENST00000369278	23376	UFL1|UFM1-specific ligase 1	chr6:96358373-96555276				20.6505	24.9251	0.271425	0.0155	0.0431285
ENSG00000014138	ENST00000265465///ENST00000527850///ENST00000532469///ENST00000532391///ENST00000527618///ENST00000525924///ENST00000533192///ENST00000534785	23649	POLA2|polymerase (DNA directed), alpha 2, accessory subunit	chr11:65261761-65305589	GO:0003677|DNA binding|///GO:0005737|cytoplasm|///GO:0046982|protein heterodimerization activity|///GO:0003887|DNA-directed DNA polymerase activity|///GO:0071897|DNA biosynthetic process|///GO:0005654|nucleoplasm|///GO:0006260|DNA replication|///GO:0000723|telomere maintenance|///GO:0003674|molecular_function|///GO:0000278|mitotic cell cycle|///GO:0006270|DNA replication initiation|///GO:0000082|…			118.466	35.4977	-1.73867	5e-05	0.00026084
ENSG00000014164	ENST00000262577///ENST00000528401	23144	ZC3H3|zinc finger CCCH-type containing 3	chr8:143437654-143541453	GO:0003677|DNA binding|///GO:0046872|metal ion binding|///GO:0005634|nucleus|///GO:0006378|mRNA polyadenylation|///GO:0003674|molecular_function|///GO:0016973|poly(A)+ mRNA export from nucleus|///GO:0010793|regulation of mRNA export from nucleus|///GO:0046332|SMAD binding|///GO:0070412|R-SMAD binding|///GO:0005847|mRNA cleavage and polyadenylation specificity factor complex|///GO:0031124|mRNA 3'-…			2.02065	2.6064	0.367237	0.0192	0.0517375
ENSG00000014216	ENST00000528396///ENST00000529133///ENST00000533820///ENST00000527739///ENST00000526966///ENST00000533129///ENST00000524773///ENST00000530442///ENST00000279247///ENST00000528739///ENST00000532285///ENST00000527189///ENST00000527469///ENST00000534373///ENST00000526954///ENST00000531068///ENST00000527699///ENST00000533909///ENST00000527323///ENST00000526468///ENST00000527897///ENST00000533079///ENS…	823	CAPN1|calpain 1, (mu/I) large subunit	chr11:65177605-65212006	GO:0004198|calcium-dependent cysteine-type endopeptidase activity|///GO:0005509|calcium ion binding|///GO:0006508|proteolysis|///GO:0005622|intracellular|///GO:0005737|cytoplasm|///GO:0016020|membrane|///GO:0005886|plasma membrane|///GO:0005829|cytosol|///GO:0008284|positive regulation of cell proliferation|///GO:0005515|protein binding|///GO:0070062|extracellular exosome|///GO:0022617|extracellu…			80.5487	97.1359	0.270144	0.27355	0.431371
ENSG00000014257	ENST00000336375///ENST00000495911///ENST00000475741///ENST00000351273///ENST00000493235///ENST00000489084///ENST00000483689///ENST00000512463///ENST00000507647	55	ACPP|acid phosphatase, prostate	chr3:132317366-132368298				1.18896	0.866183	-0.456961	0.172	0.306284
ENSG00000014641	ENST00000485781///ENST00000233114///ENST00000409908///ENST00000442225///ENST00000409476///ENST00000485155///ENST00000436321///ENST00000462944///ENST00000454035///ENST00000472098///ENST00000432309///ENST00000421012///ENST00000484538///ENST00000495083///ENST00000539945///ENST00000544381	4190	MDH1|malate dehydrogenase 1, NAD (soluble)	chr2:63121382-63827843	GO:0005615|extracellular space|///GO:0005737|cytoplasm|///GO:0005813|centrosome|///GO:0055114|oxidation-reduction process|///GO:0016491|oxidoreductase activity|///GO:0005829|cytosol|///GO:0005975|carbohydrate metabolic process|///GO:0003824|catalytic activity|///GO:0019752|carboxylic acid metabolic process|///GO:0006099|tricarboxylic acid cycle|///GO:0016616|oxidoreductase activity, acting on the…			379.044	294.912	-0.362081	0.00275	0.00966858
ENSG00000014824	ENST00000264451///ENST00000513699///ENST00000510460///ENST00000509683///ENST00000505523	10463	SLC30A9|solute carrier family 30 (zinc transporter), member 9	chr4:41990471-42090457				44.6199	46.0359	0.0450698	0.7721	0.870219
ENSG00000014914	ENST00000466496///ENST00000482025///ENST00000369140///ENST00000482343///ENST00000492824///ENST00000495054///ENST00000490310///ENST00000493562///ENST00000479272///ENST00000439741	10903	MTMR11|myotubularin related protein 11	chr1:149928650-149936898	GO:0070062|extracellular exosome|			16.4821	10.019	-0.718158	0.0001	0.000496109
ENSG00000014919	ENST00000370483///ENST00000016171///ENST00000497381	1355	COX15|cytochrome c oxidase assembly homolog 15 (yeast)	chr10:99659505-99756134				25.0912	24.7153	-0.0217761	0.89495	0.93819
ENSG00000015133	ENST00000556726///ENST00000389857///ENST00000334448///ENST00000557455///ENST00000555995///ENST00000557507///ENST00000554051///ENST00000554872///ENST00000553437///ENST00000389856///ENST00000553403///ENST00000554165///ENST00000556767///ENST00000331194	440193	CCDC88C|coiled-coil domain containing 88C	chr14:91271322-91417844				6.45645	16.2795	1.33424	0.0003	0.00135017
ENSG00000015153	ENST00000327791///ENST00000534854///ENST00000380790///ENST00000550315///ENST00000552109///ENST00000547622///ENST00000547351///ENST00000551268///ENST00000551528///ENST00000548661///ENST00000546972///ENST00000546726///ENST00000547724///ENST00000552928///ENST00000548917///ENST00000547254///ENST00000541702///ENST00000546782///ENST00000555248	10138	YAF2|YY1 associated factor 2	chr12:42157103-42238349				21.1497	22.4795	0.0879739	0.7039	0.827404
ENSG00000015171	ENST00000439456///ENST00000509513///ENST00000381591///ENST00000403354///ENST00000402736///ENST00000602682///ENST00000397955///ENST00000381584///ENST00000558098///ENST00000488275///ENST00000473115///ENST00000381607///ENST00000397959///ENST00000309776///ENST00000397962///ENST00000381604///ENST00000627286	10771	ZMYND11|zinc finger, MYND-type containing 11	chr10:134464-254637	GO:0008270|zinc ion binding|///GO:0005634|nucleus|///GO:0006351|transcription, DNA-templated|///GO:0003682|chromatin binding|///GO:0007049|cell cycle|///GO:0035064|methylated histone binding|///GO:0042393|histone binding|///GO:0000122|negative regulation of transcription from RNA polymerase II promoter|///GO:0005654|nucleoplasm|///GO:0003714|transcription corepressor activity|///GO:0016568|chroma…			117.745	68.1379	-0.789134	5e-05	0.00026084
ENSG00000015285	ENST00000450772///ENST00000376701///ENST00000465982///ENST00000483750///ENST00000490627///ENST00000474174///ENST00000470107	7454	WAS|Wiskott-Aldrich syndrome	chrX:48676595-48691427	GO:0006955|immune response|///GO:0003779|actin binding|///GO:0007264|small GTPase mediated signal transduction|///GO:0050852|T cell receptor signaling pathway|///GO:0005829|cytosol|///GO:0045087|innate immune response|///GO:0050790|regulation of catalytic activity|///GO:0015629|actin cytoskeleton|///GO:0008544|epidermis development|///GO:0019901|protein kinase binding|///GO:0005515|protein bindin…			0.328251	0.422891	0.365489	0.5861	0.741872
ENSG00000015413	ENST00000570029///ENST00000565249///ENST00000564281///ENST00000568281///ENST00000393092///ENST00000561484///ENST00000261615///ENST00000564645///ENST00000421184	1800	DPEP1|dipeptidase 1 (renal)	chr16:89613307-89638456				0.031187	0.213156	2.77289	1	1
ENSG00000015475	ENST00000317361///ENST00000399774///ENST00000399765///ENST00000494097///ENST00000342111///ENST00000550946///ENST00000551952///ENST00000473439///ENST00000552886///ENST00000622694///ENST00000611040///ENST00000615414///ENST00000614949///ENST00000399767///ENST00000617586	637	BID|BH3 interacting domain death agonist	chr22:17734137-17774770				20.6466	43.6225	1.07917	5e-05	0.00026084
ENSG00000015479	ENST00000394805///ENST00000512876///ENST00000513678///ENST00000513121///ENST00000504045///ENST00000504311///ENST00000502499///ENST00000510056///ENST00000511249///ENST00000507860///ENST00000509918///ENST00000511978///ENST00000503811///ENST00000511378///ENST00000508689///ENST00000514528///ENST00000504643///ENST00000514488///ENST00000503340///ENST00000504023///ENST00000515833///ENST00000514402///ENS…	9782	MATR3|matrin 3	chr5:138946719-139331677				527.213	276.015	-0.933642	5e-05	0.00026084
ENSG00000015520	ENST00000289547///ENST00000381160///ENST00000423141///ENST00000546276	29881	NPC1L1|NPC1-like 1	chr7:44512534-44541315				0.0505344	2.65431	5.71493	5e-05	0.00026084
ENSG00000015532	ENST00000017003///ENST00000509778///ENST00000507602///ENST00000376550///ENST00000511654///ENST00000574840///ENST00000571021	64132	XYLT2|xylosyltransferase II	chr17:50346091-50365232				8.00116	5.02498	-0.67109	0.0003	0.00135017
ENSG00000015568	ENST00000393283///ENST00000430736///ENST00000016946///ENST00000441344///ENST00000432606///ENST00000482778///ENST00000472794///ENST00000413468///ENST00000495473///ENST00000493394///ENST00000495582///ENST00000477523///ENST00000272454	84220///729540	RGPD5|RANBP2-like and GRIP domain containing 5///RGPD5|RANBP2-like and GRIP domain containing 6	chr2:109792757-109857695	GO:0005737|cytoplasm|///GO:0005515|protein binding|///GO:0000042|protein targeting to Golgi|///GO:0046907|intracellular transport|			0.355077	0.497544	0.486692	0.18005	0.316883
ENSG00000015592	ENST00000350889///ENST00000519997///ENST00000265770///ENST00000523048///ENST00000519614///ENST00000522908///ENST00000522750	81551	STMN4|stathmin-like 4	chr8:27235322-27258420				0.0378209	1.68014	5.47325	0.05525	0.12503
ENSG00000015676	ENST00000355451///ENST00000487118///ENST00000460110///ENST00000475952///ENST00000338427///ENST00000493613///ENST00000472246///ENST00000464812///ENST00000478769///ENST00000480209///ENST00000497978	23386	NUDCD3|NudC domain containing 3	chr7:44379120-44490880				39.9497	59.1221	0.565511	0.0009	0.00362734
ENSG00000016082	ENST00000230658///ENST00000511384///ENST00000505475	3670	ISL1|ISL LIM homeobox 1	chr5:51383390-51394738				0.064889	0.124769	0.943216	1	1
ENSG00000016391	ENST00000315251///ENST00000481668///ENST00000467802	55349	CHDH|choline dehydrogenase	chr3:53494655-53846390				2.57644	4.40559	0.773956	5e-05	0.00026084
ENSG00000016402	ENST00000316649///ENST00000468393///ENST00000635289///ENST00000367746///ENST00000461799///ENST00000460306///ENST00000541547///ENST00000367748	53832	IL20RA|interleukin 20 receptor, alpha	chr6:136999970-137045180				0.519007	1.75358	1.75648	5e-05	0.00026084
ENSG00000016490	ENST00000234701///ENST00000394711	1179	CLCA1|chloride channel accessory 1	chr1:86468367-86500289	GO:0006508|proteolysis|///GO:0005615|extracellular space|///GO:0046872|metal ion binding|///GO:0055085|transmembrane transport|///GO:0006810|transport|///GO:0005886|plasma membrane|///GO:0008237|metallopeptidase activity|///GO:0006821|chloride transport|///GO:0034220|ion transmembrane transport|///GO:0005887|integral component of plasma membrane|///GO:0006816|calcium ion transport|///GO:1902476|c…			0	0.00322068	18.6778	1	1
ENSG00000016602	ENST00000370563///ENST00000496322	22802	CLCA4|chloride channel accessory 4	chr1:86547077-86693203	GO:0006508|proteolysis|///GO:0046872|metal ion binding|///GO:0055085|transmembrane transport|///GO:0006810|transport|///GO:0005886|plasma membrane|///GO:0008237|metallopeptidase activity|///GO:0006821|chloride transport|///GO:0034220|ion transmembrane transport|///GO:0005887|integral component of plasma membrane|///GO:1902476|chloride transmembrane transport|///GO:0005254|chloride channel activit…			0.00270961	0.00602716	1.1534	1	1
ENSG00000016864	ENST00000478968///ENST00000394783///ENST00000491606///ENST00000481643///ENST00000484163///ENST00000463827///ENST00000480080///ENST00000485899///ENST00000479553///ENST00000489119///ENST00000497436///ENST00000497953///ENST00000487642///ENST00000464705///ENST00000463762///ENST00000266014///ENST00000407584	55830	GLT8D1|glycosyltransferase 8 domain containing 1	chr3:52495337-52770949				27.9948	56.4094	1.01078	0.0085	0.0258209
ENSG00000017260	ENST00000505330///ENST00000504381///ENST00000507488///ENST00000509150///ENST00000510168///ENST00000508532///ENST00000504948///ENST00000513801///ENST00000505072///ENST00000509662///ENST00000328560///ENST00000428331///ENST00000359644///ENST00000422190///ENST00000508297///ENST00000504612///ENST00000513636///ENST00000515854///ENST00000514654///ENST00000504571///ENST00000508660///ENST00000510774///ENS…	27032	ATP2C1|ATPase, Ca++ transporting, type 2C, member 1	chr3:130850594-131381475				117.037	77.3429	-0.597626	0.0012	0.0046836
ENSG00000017427	ENST00000337514///ENST00000481539///ENST00000392904///ENST00000424202///ENST00000392905///ENST00000307046///ENST00000456098	3479	IGF1|insulin-like growth factor 1 (somatomedin C)	chr12:102120184-102480645				0.00136305	0.132264	6.60044	1	1
ENSG00000017483	ENST00000595796///ENST00000619100///ENST00000497336///ENST00000615300///ENST00000480105///ENST00000494034///ENST00000440085///ENST00000441948///ENST00000413668///ENST00000416711///ENST00000488083///ENST00000429543///ENST00000620913///ENST00000622196	92745	SLC38A5|solute carrier family 38, member 5	chrX:48458536-48470256				0.171198	0.204106	0.253653	1	1
ENSG00000017797	ENST00000019317///ENST00000585015///ENST00000383432///ENST00000458039///ENST00000577221	10928	RALBP1|ralA binding protein 1	chr18:9475008-9538116				26.6739	29.3324	0.137065	0.30585	0.470111
ENSG00000018189	ENST00000514898///ENST00000503876///ENST00000417478///ENST00000381006///ENST00000226328///ENST00000513597///ENST00000502653///ENST00000504805///ENST00000512103///ENST00000507333///ENST00000503025///ENST00000512331///ENST00000515479///ENST00000515442///ENST00000513593	22902	RUFY3|RUN and FYVE domain containing 3	chr4:70703746-70807315				13.5012	15.321	0.182418	0.4854	0.654129
ENSG00000018236	ENST00000547702///ENST00000551424///ENST00000551295///ENST00000548005///ENST00000552248///ENST00000547849///ENST00000552913///ENST00000348761///ENST00000550305///ENST00000548481///ENST00000347616	1272	CNTN1|contactin 1	chr12:40692441-41072418				0	0.0190335	18.6778	1	1
ENSG00000018280	ENST00000468221///ENST00000233202///ENST00000473367///ENST00000465984///ENST00000539932///ENST00000354352///ENST00000481524///ENST00000494322///ENST00000471875///ENST00000469799///ENST00000492413///ENST00000475225///ENST00000469449///ENST00000483487///ENST00000460592///ENST00000490872///ENST00000490536///ENST00000468721	6556	SLC11A1|solute carrier family 11 (proton-coupled divalent metal ion transporter), member 1	chr2:218382028-218396894				0.107804	0.151189	0.487941	1	1
ENSG00000018408	ENST00000465804///ENST00000360632///ENST00000467467///ENST00000471586///ENST00000494754///ENST00000472417///ENST00000485244///ENST00000479238///ENST00000485352///ENST00000475579///ENST00000460517///ENST00000474080	25937	WWTR1|WW domain containing transcription regulator 1	chr3:149517234-149736714				19.2874	9.07226	-1.08813	5e-05	0.00026084
ENSG00000018510	ENST00000264167///ENST00000409888///ENST00000460342	8540	AGPS|alkylglycerone phosphate synthase	chr2:177227594-177543836				0.00668329	0.0416839	2.64086	1	1
ENSG00000018607	ENST00000438300		ZNF806|	chr2:132309308-132318736				0	0	0	1	1
ENSG00000018610	ENST00000320339///ENST00000536133///ENST00000469448	63932	CXorf56|chromosome X open reading frame 56	chrX:119538148-119565408				37.6557	23.5664	-0.676139	5e-05	0.00026084
ENSG00000018625	ENST00000472488///ENST00000478587///ENST00000361216///ENST00000392233///ENST00000468587///ENST00000447527///ENST00000463989///ENST00000459972	477	ATP1A2|ATPase, Na+/K+ transporting, alpha 2 polypeptide	chr1:160115758-160143591				0.0833633	0.0135951	-2.61633	1	1
ENSG00000018699	ENST00000448773///ENST00000317907///ENST00000454690///ENST00000438654///ENST00000433416///ENST00000428527	55622	TTC27|tetratricopeptide repeat domain 27	chr2:32628031-32821051				15.5396	12.0581	-0.365949	0.0378	0.0911732
ENSG00000018869	ENST00000589143///ENST00000301310///ENST00000586929///ENST00000587778///ENST00000593145///ENST00000589895///ENST00000619584	147948	ZNF582|zinc finger protein 582	chr19:56219669-56393545	GO:0003676|nucleic acid binding|///GO:0006355|regulation of transcription, DNA-templated|///GO:0005622|intracellular|///GO:0003677|DNA binding|///GO:0046872|metal ion binding|///GO:0005634|nucleus|///GO:0006351|transcription, DNA-templated|			0	0.0177914	18.6778	1	1
ENSG00000019102	ENST00000326621///ENST00000403470	23584	VSIG2|V-set and immunoglobulin domain containing 2	chr11:124747471-124752238	GO:0016020|membrane|///GO:0005887|integral component of plasma membrane|///GO:0005515|protein binding|			0.0981656	1.09721	3.48247	0.0004	0.00175048
ENSG00000019144	ENST00000361417///ENST00000530994///ENST00000528594///ENST00000621027///ENST00000356063///ENST00000532639///ENST00000525427///ENST00000527259///ENST00000526374///ENST00000617208///ENST00000532517///ENST00000614369///ENST00000527898///ENST00000534140///ENST00000612681///ENST00000526699///ENST00000527500///ENST00000528875///ENST00000392852///ENST00000524713///ENST00000531987///ENST00000526826///ENS…	23187	PHLDB1|pleckstrin homology-like domain, family B, member 1	chr11:118606439-118679690				4.90103	2.553	-0.940889	0.00065	0.00271388
ENSG00000019169	ENST00000327097///ENST00000412481///ENST00000494979	8685	MARCO|macrophage receptor with collagenous structure	chr2:118942165-118994660				0	0.0342576	18.6778	1	1
ENSG00000019186	ENST00000216862///ENST00000395955///ENST00000460643///ENST00000395954///ENST00000487593///ENST00000472970	1591	CYP24A1|cytochrome P450, family 24, subfamily A, polypeptide 1	chr20:54153448-54173973				2.41584	0.198407	-3.60599	5e-05	0.00026084
ENSG00000019485	ENST00000530656///ENST00000526442///ENST00000424263///ENST00000534751///ENST00000528980///ENST00000622142	56981	PRDM11|PR domain containing 11	chr11:45095805-45235292				1.21085	0.55356	-1.1292	0.0007	0.00289617
ENSG00000019505	ENST00000020926///ENST00000533332///ENST00000528101	57586	SYT13|synaptotagmin XIII	chr11:45240300-45286319				0.234444	0.195368	-0.263053	1	1
ENSG00000019549	ENST00000396822///ENST00000020945	6591	SNAI2|snail family zinc finger 2	chr8:48917689-48921740	GO:0046872|metal ion binding|///GO:0005634|nucleus|///GO:0006351|transcription, DNA-templated|///GO:0005737|cytoplasm|///GO:0043565|sequence-specific DNA binding|///GO:0007605|sensory perception of sound|///GO:0000122|negative regulation of transcription from RNA polymerase II promoter|///GO:0060070|canonical Wnt signaling pathway|///GO:0000790|nuclear chromatin|///GO:0005515|protein binding|///G…			0.416422	0.163515	-1.34863	0.0002	0.000933714
ENSG00000019582	ENST00000377795///ENST00000353334///ENST00000518797///ENST00000524315///ENST00000009530///ENST00000523208///ENST00000517752///ENST00000522246///ENST00000523813///ENST00000523836///ENST00000517791///ENST00000522153	972	CD74|CD74 molecule, major histocompatibility complex, class II invariant chain	chr5:150401636-150412929				0.340317	9.98785	4.87522	5e-05	0.00026084
ENSG00000019991	ENST00000222390///ENST00000457544///ENST00000444829///ENST00000453411///ENST00000423064///ENST00000465234///ENST00000453018///ENST00000412881///ENST00000421558///ENST00000354224	3082	HGF|hepatocyte growth factor (hepapoietin A; scatter factor)	chr7:81699005-81770438				0	0.00156684	18.6778	1	1
ENSG00000019995	ENST00000359653///ENST00000471421	54764	ZRANB1|zinc finger, RAN-binding domain containing 1	chr10:124917142-125161170	GO:0008270|zinc ion binding|///GO:0005634|nucleus|///GO:0005737|cytoplasm|///GO:0004843|ubiquitin-specific protease activity|///GO:0016055|Wnt signaling pathway|///GO:0016477|cell migration|///GO:0007010|cytoskeleton organization|///GO:0005654|nucleoplasm|///GO:0070530|K63-linked polyubiquitin binding|///GO:0005515|protein binding|///GO:0022604|regulation of cell morphogenesis|///GO:0070536|prote…			16.6417	11.9144	-0.4821	0.35045	0.519746
ENSG00000020129	ENST00000373253///ENST00000356090///ENST00000373243///ENST00000459931///ENST00000437806///ENST00000423723	23154	NCDN|neurochondrin	chr1:35433489-35567274				5.15174	5.5485	0.10704	0.78065	0.875684
ENSG00000020181	ENST00000428068///ENST00000315215///ENST00000412232	25960	ADGRA2|adhesion G protein-coupled receptor A2	chr8:37784190-37849904	GO:0005515|protein binding|///GO:0016021|integral component of membrane|///GO:0007186|G-protein coupled receptor signaling pathway|///GO:0016020|membrane|///GO:0005886|plasma membrane|///GO:0004930|G-protein coupled receptor activity|///GO:0004888|transmembrane signaling receptor activity|///GO:0007166|cell surface receptor signaling pathway|///GO:0007417|central nervous system development|///GO:…			0.241561	0.0423764	-2.51106	1	1
ENSG00000020219	ENST00000465400		CCT8L1P|	chr7:152445476-152447150				0	0.00638162	18.6778	1	1
ENSG00000020256	ENST00000371518///ENST00000371523///ENST00000361387///ENST00000456175///ENST00000395989///ENST00000467811///ENST00000477786///ENST00000395979///ENST00000346617///ENST00000371515///ENST00000216923///ENST00000461898	55734	ZFP64|ZFP64 zinc finger protein	chr20:52051662-52204308				12.0031	9.5044	-0.336745	0.0838	0.175146
ENSG00000020426	ENST00000555545///ENST00000261245///ENST00000556764///ENST00000539616///ENST00000553354///ENST00000556525///ENST00000554002///ENST00000554641///ENST00000557134	4331	MNAT1|MNAT CDK-activating kinase assembly factor 1	chr14:60734741-61083733				78.2219	49.5415	-0.658935	0.00105	0.00416101
ENSG00000020577	ENST00000554335///ENST00000251091///ENST00000555112///ENST00000555091///ENST00000557692///ENST00000557013///ENST00000554587///ENST00000555192///ENST00000556069///ENST00000553988///ENST00000555719///ENST00000631086///ENST00000392067	23034	SAMD4A|sterile alpha motif domain containing 4A	chr14:54567096-54793315				3.66343	4.76638	0.3797	0.20215	0.345287
ENSG00000020633	ENST00000308873///ENST00000338888///ENST00000496967///ENST00000479341///ENST00000399916	864	RUNX3|runt-related transcription factor 3	chr1:24899510-24965121	GO:0005524|ATP binding|///GO:0006468|protein phosphorylation|///GO:0003677|DNA binding|///GO:0006357|regulation of transcription from RNA polymerase II promoter|///GO:0005634|nucleus|///GO:0006355|regulation of transcription, DNA-templated|///GO:0003700|transcription factor activity, sequence-specific DNA binding|///GO:0005737|cytoplasm|///GO:0043231|intracellular membrane-bounded organelle|///GO…			0	0.0118591	18.6778	1	1
ENSG00000020922	ENST00000323929///ENST00000407439///ENST00000323977///ENST00000393241///ENST00000535120///ENST00000540013///ENST00000541157///ENST00000536754///ENST00000538923///ENST00000536144	4361	MRE11A|MRE11 homolog A, double strand break repair nuclease	chr11:94415577-94499583				20.3181	10.3317	-0.975688	5e-05	0.00026084
ENSG00000021300	ENST00000354190///ENST00000398492///ENST00000536527///ENST00000227214///ENST00000398494///ENST00000543085///ENST00000544532///ENST00000545798///ENST00000539157///ENST00000546251///ENST00000535582///ENST00000538227///ENST00000541760///ENST00000543524///ENST00000541597///ENST00000535129///ENST00000542389///ENST00000540431///ENST00000426191///ENST00000540157///ENST00000545106///ENST00000544282	58473	PLEKHB1|pleckstrin homology domain containing, family B (evectins) member 1	chr11:73646177-73662819				8.49619	16.8422	0.987197	0.0003	0.00135017
ENSG00000021355	ENST00000380739///ENST00000468511///ENST00000490094///ENST00000476896///ENST00000460260	1992	SERPINB1|serpin peptidase inhibitor, clade B (ovalbumin), member 1	chr6:2832331-2842006				42.0977	46.405	0.140541	0.4405	0.612278
ENSG00000021461	ENST00000354829///ENST00000436834///ENST00000417625///ENST00000463915///ENST00000444905///ENST00000415413///ENST00000477658///ENST00000495115///ENST00000433277///ENST00000491648///ENST00000481362///ENST00000434806///ENST00000312017///ENST00000222382///ENST00000472352///ENST00000631161///ENST00000342499	64816	CYP3A43|cytochrome P450, family 3, subfamily A, polypeptide 43	chr7:99828012-99866102				0	0	0	1	1
ENSG00000021488	ENST00000590341///ENST00000590465///ENST00000023064///ENST00000592232///ENST00000587772///ENST00000589659	11136	SLC7A9|solute carrier family 7 (amino acid transporter light chain, bo,+ system), member 9	chr19:32830508-32869766				0.0632741	0.194485	1.61997	1	1
ENSG00000021574	ENST00000345662///ENST00000315285///ENST00000621856///ENST00000615843	6683	SPAST|spastin	chr2:32063610-32157637				13.9004	8.3159	-0.741182	5e-05	0.00026084
ENSG00000021645	ENST00000634499///ENST00000554738///ENST00000635466///ENST00000556088///ENST00000553363///ENST00000553631///ENST00000554719///ENST00000556496///ENST00000634266///ENST00000557081///ENST00000557594///ENST00000281127///ENST00000428277///ENST00000555387///ENST00000555073///ENST00000553803///ENST00000556003///ENST00000335750	9369	NRXN3|neurexin 3	chr14:78242390-79868290				0.0869771	0.182017	1.06537	1	1
ENSG00000021762	ENST00000478260///ENST00000263650///ENST00000389989///ENST00000534454///ENST00000498536///ENST00000525498///ENST00000471998///ENST00000348039///ENST00000534491///ENST00000532951///ENST00000459995///ENST00000533234///ENST00000465323///ENST00000477622///ENST00000526122///ENST00000530372///ENST00000533721///ENST00000534157///ENST00000528124	114879	OSBPL5|oxysterol binding protein-like 5	chr11:3087115-3166739				1.97984	4.11927	1.057	5e-05	0.00026084
ENSG00000021776	ENST00000156471///ENST00000543879///ENST00000559090///ENST00000559767///ENST00000560117///ENST00000558202	9716	AQR|aquarius intron-binding spliceosomal factor	chr15:34851781-34969839				20.4745	20.9339	0.0320148	0.8852	0.932702
ENSG00000021826	ENST00000417946///ENST00000518043///ENST00000523702///ENST00000430249///ENST00000233072///ENST00000497163///ENST00000451903///ENST00000467353///ENST00000497121///ENST00000470791///ENST00000479988///ENST00000619804	1373	CPS1|carbamoyl-phosphate synthase 1, mitochondrial	chr2:210477681-210679107				0.411908	1.64718	1.99961	5e-05	0.00026084
ENSG00000021852	ENST00000371237///ENST00000465658///ENST00000468990///ENST00000494324///ENST00000535057///ENST00000543257	732	C8B|complement component 8, beta polypeptide	chr1:56929209-58546802	GO:0005576|extracellular region|///GO:0006955|immune response|///GO:0016020|membrane|///GO:0045087|innate immune response|///GO:0006956|complement activation|///GO:0005515|protein binding|///GO:0006958|complement activation, classical pathway|///GO:0070062|extracellular exosome|///GO:0030449|regulation of complement activation|///GO:0005579|membrane attack complex|///GO:1903561|extracellular vesi…			0	0	0	1	1
ENSG00000022267	ENST00000629039///ENST00000370690///ENST00000627578///ENST00000618438///ENST00000420362///ENST00000458357///ENST00000628443///ENST00000627383///ENST00000630084///ENST00000630278///ENST00000452016///ENST00000625935///ENST00000535737///ENST00000627812///ENST00000434885///ENST00000543669///ENST00000456445///ENST00000628032///ENST00000449474///ENST00000345434///ENST00000628919///ENST00000539015///ENS…	2273	FHL1|four and a half LIM domains 1	chrX:136146701-136211359	GO:0008270|zinc ion binding|///GO:0005634|nucleus|///GO:0005737|cytoplasm|///GO:0005886|plasma membrane|///GO:0005829|cytosol|///GO:0030154|cell differentiation|///GO:0007517|muscle organ development|///GO:0005515|protein binding|///GO:0003674|molecular_function|///GO:0030308|negative regulation of cell growth|///GO:2000134|negative regulation of G1/S transition of mitotic cell cycle|///GO:004432…			5.23622	7.4601	0.510668	0.00365	0.0123444
ENSG00000022277	ENST00000357348///ENST00000395881///ENST00000484084///ENST00000449062///ENST00000487211///ENST00000466260///ENST00000477485///ENST00000477573///ENST00000023939	51507	RTFDC1|replication termination factor 2 domain containing 1	chr20:56468584-56526142				231.678	173.703	-0.415498	0.00375	0.0126542
ENSG00000022355	ENST00000023897///ENST00000635096///ENST00000393943///ENST00000428797///ENST00000437025///ENST00000519621///ENST00000521339///ENST00000522651///ENST00000634335///ENST00000519542	2554	GABRA1|gamma-aminobutyric acid (GABA) A receptor, alpha 1	chr5:161847190-161899969				0.180803	0.0181123	-3.31937	1	1
ENSG00000022556	ENST00000588619///ENST00000588107///ENST00000433772///ENST00000543010///ENST00000540597///ENST00000391721///ENST00000339757///ENST00000539848///ENST00000585500///ENST00000427260///ENST00000263437///ENST00000397169///ENST00000540005///ENST00000543277///ENST00000381637///ENST00000586512///ENST00000542755///ENST00000448584///ENST00000537859	55655	NLRP2|NLR family, pyrin domain containing 2	chr19:54923508-55001142				0.047863	0	-16.6898	1	1
ENSG00000022567	ENST00000519067///ENST00000517878///ENST00000024061///ENST00000520137///ENST00000519986///ENST00000521804	57210	SLC45A4|solute carrier family 45, member 4	chr8:141207165-141308305				5.47344	4.95939	-0.142285	0.5797	0.735953
ENSG00000022840	ENST00000539486///ENST00000325954///ENST00000542438///ENST00000538796///ENST00000413266///ENST00000551139///ENST00000536869///ENST00000537997///ENST00000543578///ENST00000535417///ENST00000542207///ENST00000543675///ENST00000537740///ENST00000537376///ENST00000546262///ENST00000544124///ENST00000540046///ENST00000545419///ENST00000535395///ENST00000366112///ENST00000535470///ENST00000538254///ENS…	9921	RNF10|ring finger protein 10	chr12:120503273-120577594				484.188	513.768	0.0855497	0.55815	0.718678
ENSG00000022976	ENST00000558850///ENST00000559185///ENST00000442396///ENST00000559098///ENST00000561251///ENST00000560568///ENST00000559155///ENST00000558490///ENST00000558462///ENST00000557803///ENST00000560112///ENST00000420933	55778	ZNF839|zinc finger protein 839	chr14:102317376-102362916				3.95306	6.11483	0.62934	0.0548	0.124169
ENSG00000023041	ENST00000626395///ENST00000369405///ENST00000369404///ENST00000482410///ENST00000471035	64429	ZDHHC6|zinc finger, DHHC-type containing 6	chr10:112374017-112446917				47.3974	32.2284	-0.556477	0.0202	0.0539876
ENSG00000023171	ENST00000525757///ENST00000633646///ENST00000633087///ENST00000632815///ENST00000456860///ENST00000529750///ENST00000532581///ENST00000529432///ENST00000534764///ENST00000450171///ENST00000525945///ENST00000322282	57476	GRAMD1B|GRAM domain containing 1B	chr11:123454397-123627774	GO:0016021|integral component of membrane|///GO:0016020|membrane|			0.0832886	0.097161	0.222258	1	1
ENSG00000023191	ENST00000534797///ENST00000397615///ENST00000397604///ENST00000525522///ENST00000525701///ENST00000529768///ENST00000533410///ENST00000438658///ENST00000354420///ENST00000356187///ENST00000524464///ENST00000529115///ENST00000527485///ENST00000529368///ENST00000529306///ENST00000524780///ENST00000531149///ENST00000531223///ENST00000528713///ENST00000532055///ENST00000533592///ENST00000531540///ENS…	6050	RNH1|ribonuclease/angiogenin inhibitor 1	chr11:494511-507300				14.2915	15.1831	0.0873134	0.6632	0.799963
ENSG00000023228	ENST00000233190///ENST00000423725///ENST00000457011///ENST00000440274///ENST00000449699///ENST00000432169///ENST00000498520///ENST00000456284///ENST00000454195///ENST00000455934	4719	NDUFS1|NADH dehydrogenase (ubiquinone) Fe-S protein 1, 75kDa (NADH-coenzyme Q reductase)	chr2:206114816-206162928				73.4073	58.457	-0.328548	0.09085	0.186916
ENSG00000023287	ENST00000025008///ENST00000435644///ENST00000521611///ENST00000519912///ENST00000522957///ENST00000523594///ENST00000518710///ENST00000517963///ENST00000518211///ENST00000518468	9821	RB1CC1|RB1-inducible coiled-coil 1	chr8:52622455-52745843				26.5942	34.8573	0.39035	0.18425	0.322483
ENSG00000023318	ENST00000262455	23071	ERP44|endoplasmic reticulum protein 44	chr9:99979178-100099040				23.8716	23.2502	-0.0380501	0.7319	0.846184
ENSG00000023330	ENST00000469224///ENST00000394965///ENST00000310271///ENST00000484952///ENST00000493402///ENST00000459884	211	ALAS1|5'-aminolevulinate synthase 1	chr3:52198085-52214327	GO:0008152|metabolic process|///GO:0005739|mitochondrion|///GO:0005737|cytoplasm|///GO:0009058|biosynthetic process|///GO:0016740|transferase activity|///GO:0030170|pyridoxal phosphate binding|///GO:0033014|tetrapyrrole biosynthetic process|///GO:0005654|nucleoplasm|///GO:0005759|mitochondrial matrix|///GO:0005515|protein binding|///GO:0006996|organelle organization|///GO:0044255|cellular lipid m…			10.7463	25.0475	1.22083	5e-05	0.00026084
ENSG00000023445	ENST00000526421///ENST00000263464///ENST00000528940///ENST00000532808///ENST00000527309///ENST00000527336///ENST00000615299	330	BIRC3|baculoviral IAP repeat containing 3	chr11:102317449-102339403	GO:0008270|zinc ion binding|///GO:0005634|nucleus|///GO:0004842|ubiquitin-protein transferase activity|///GO:0005737|cytoplasm|///GO:0005829|cytosol|///GO:0016567|protein ubiquitination|///GO:0043066|negative regulation of apoptotic process|///GO:0045087|innate immune response|///GO:0005654|nucleoplasm|///GO:0007249|I-kappaB kinase/NF-kappaB signaling|///GO:0038061|NIK/NF-kappaB signaling|///GO:0…			0.272688	0.771363	1.50016	0.00035	0.00155594
ENSG00000023516	ENST00000025301	11215	AKAP11|A kinase (PRKA) anchor protein 11	chr13:42272152-42323267				13.2712	11.3143	-0.230149	0.04	0.095471
ENSG00000023572	ENST00000367439///ENST00000367440///ENST00000472197	51022	GLRX2|glutaredoxin 2	chr1:193096467-193106114				43.1514	43.0741	-0.00258717	0.9836	0.988787
ENSG00000023608	ENST00000216294	6617	SNAPC1|small nuclear RNA activating complex, polypeptide 1, 43kDa	chr14:61681040-61796428	GO:0003677|DNA binding|///GO:0006355|regulation of transcription, DNA-templated|///GO:0006383|transcription from RNA polymerase III promoter|///GO:0005654|nucleoplasm|///GO:0010467|gene expression|			8.46038	6.79095	-0.317108	0.6141	0.762967
ENSG00000023697	ENST00000428559///ENST00000526521///ENST00000524480///ENST00000531803///ENST00000528821///ENST00000532964///ENST00000533447///ENST00000526530///ENST00000530274///ENST00000532573	51071	DERA|deoxyribose-phosphate aldolase (putative)	chr12:15911171-16037282				34.3908	15.6101	-1.13955	5e-05	0.00026084
ENSG00000023734	ENST00000541731///ENST00000025399///ENST00000419869///ENST00000536737///ENST00000538718///ENST00000539887	11171	STRAP|serine/threonine kinase receptor associated protein	chr12:15882390-15903478				168.512	132.111	-0.351097	0.0127	0.0365227
ENSG00000023839	ENST00000370449///ENST00000370434///ENST00000496621	1244	ABCC2|ATP-binding cassette, sub-family C (CFTR/MRP), member 2	chr10:99782731-99852192				1.09975	2.56323	1.22079	5e-05	0.00026084
ENSG00000023892	ENST00000316637///ENST00000444278///ENST00000468102	50619	DEF6|DEF6 guanine nucleotide exchange factor	chr6:35297851-35321771				2.79604	1.33067	-1.07124	0.00295	0.0102579
ENSG00000023902	ENST00000369126///ENST00000369124///ENST00000479194///ENST00000492304///ENST00000607609///ENST00000477309///ENST00000441340///ENST00000485470///ENST00000502767	51177	PLEKHO1|pleckstrin homology domain containing, family O member 1	chr1:150149182-150164720				6.34138	3.03542	-1.0629	5e-05	0.00026084
ENSG00000023909	ENST00000370238///ENST00000467772///ENST00000462183///ENST00000615724	2730	GCLM|glutamate-cysteine ligase, modifier subunit	chr1:93885204-93909456				23.1433	14.7138	-0.653425	0.00425	0.0140968
ENSG00000024048	ENST00000372903///ENST00000372899///ENST00000372901	23304	UBR2|ubiquitin protein ligase E3 component n-recognin 2	chr6:42564061-42693504	GO:0008270|zinc ion binding|///GO:0005737|cytoplasm|///GO:0005886|plasma membrane|///GO:0000151|ubiquitin ligase complex|///GO:0061630|ubiquitin protein ligase activity|///GO:0071596|ubiquitin-dependent protein catabolic process via the N-end rule pathway|///GO:0005654|nucleoplasm|///GO:0016874|ligase activity|///GO:0032007|negative regulation of TOR signaling|///GO:0005515|protein binding|///GO:…			13.4676	12.2093	-0.141511	0.21105	0.356795
ENSG00000024422	ENST00000263277///ENST00000538399///ENST00000602215///ENST00000596225///ENST00000540884	30846	EHD2|EH-domain containing 2	chr19:47607523-47743134	GO:0005509|calcium ion binding|///GO:0005524|ATP binding|///GO:0003676|nucleic acid binding|///GO:0005525|GTP binding|///GO:0032456|endocytic recycling|///GO:0008152|metabolic process|///GO:0016787|hydrolase activity|///GO:0005634|nucleus|///GO:0005886|plasma membrane|///GO:0005829|cytosol|///GO:0019898|extrinsic component of membrane|///GO:0055038|recycling endosome membrane|///GO:0005515|protei…			0.977181	1.32606	0.440448	0.3421	0.510098
ENSG00000024526	ENST00000456315///ENST00000370966///ENST00000488146///ENST00000489862///ENST00000525124	55635	DEPDC1|DEP domain containing 1	chr1:68474151-68538627				20.2946	7.09971	-1.51526	5e-05	0.00026084
ENSG00000024862	ENST00000332797///ENST00000617445///ENST00000611852///ENST00000610978	25901	CCDC28A|coiled-coil domain containing 28A	chr6:138725210-138793319				8.18517	9.32564	0.18819	0.21405	0.360718
ENSG00000025039	ENST00000369415///ENST00000359203///ENST00000492783	58528	RRAGD|Ras-related GTP binding D	chr6:89364635-89412270				5.23891	17.2064	1.71561	5e-05	0.00026084
ENSG00000025156	ENST00000368455///ENST00000465214///ENST00000452194	3298	HSF2|heat shock transcription factor 2	chr6:122399545-122433119				21.2009	14.8419	-0.51445	0.0041	0.0136732
ENSG00000025293	ENST00000461122///ENST00000374012///ENST00000461405///ENST00000452270///ENST00000339089///ENST00000481202///ENST00000374000///ENST00000617560///ENST00000449988///ENST00000486408///ENST00000495338///ENST00000496305///ENST00000480940///ENST00000485604///ENST00000420233///ENST00000473943///ENST00000439301	51230	PHF20|PHD finger protein 20	chr20:35771973-35950381				19.8406	16.7355	-0.245544	0.2723	0.429987
ENSG00000025423	ENST00000555159///ENST00000555805///ENST00000554643///ENST00000556650///ENST00000554150///ENST00000556481///ENST00000554155///ENST00000322165///ENST00000556875///ENST00000553476	8630	HSD17B6|hydroxysteroid (17-beta) dehydrogenase 6	chr12:56712427-56787790				2.79301	2.83096	0.0194682	0.985	0.989789
ENSG00000025434	ENST00000495866///ENST00000527464///ENST00000529540///ENST00000395397///ENST00000405576///ENST00000481020///ENST00000481889///ENST00000436778///ENST00000487913///ENST00000531660///ENST00000532630///ENST00000407404///ENST00000444396///ENST00000457932///ENST00000412937///ENST00000449369///ENST00000486991///ENST00000419652///ENST00000461778///ENST00000441012///ENST00000437276///ENST00000525441///ENS…	10062	NR1H3|nuclear receptor subfamily 1, group H, member 3	chr11:47239301-47269032	GO:0003677|DNA binding|///GO:0008270|zinc ion binding|///GO:0005634|nucleus|///GO:0006355|regulation of transcription, DNA-templated|///GO:0003700|transcription factor activity, sequence-specific DNA binding|///GO:0045944|positive regulation of transcription from RNA polymerase II promoter|///GO:0043565|sequence-specific DNA binding|///GO:0044212|transcription regulatory region DNA binding|///GO:…			8.01772	8.88275	0.147814	0.6979	0.823803
ENSG00000025708	ENST00000395680///ENST00000395681///ENST00000252029///ENST00000487577///ENST00000395678///ENST00000476284///ENST00000425169///ENST00000487162	1890	TYMP|thymidine phosphorylase	chr22:50523567-50532580				0.16778	0.275586	0.715928	1	1
ENSG00000025770	ENST00000420993///ENST00000395698///ENST00000395701///ENST00000518394///ENST00000523045///ENST00000418794///ENST00000299821///ENST00000520297///ENST00000522048///ENST00000522304	29781	NCAPH2|non-SMC condensin II complex, subunit H2	chr22:50508215-50523472	GO:0016020|membrane|///GO:0005654|nucleoplasm|///GO:0005694|chromosome|///GO:0005515|protein binding|///GO:0000278|mitotic cell cycle|///GO:0030261|chromosome condensation|			17.3087	7.56197	-1.19466	5e-05	0.00026084
ENSG00000025772	ENST00000372813	10953	TOMM34|translocase of outer mitochondrial membrane 34	chr20:44910061-44960486				15.0262	34.2715	1.18952	5e-05	0.00026084
ENSG00000025796	ENST00000369002///ENST00000459782///ENST00000473746///ENST00000465210///ENST00000466419///ENST00000489455///ENST00000429168///ENST00000484803///ENST00000446496///ENST00000460009	11231	SEC63|SEC63 homolog, protein translocation regulator	chr6:107867755-107959986				164.406	149.908	-0.133193	0.4809	0.649983
ENSG00000025800	ENST00000373625///ENST00000471599///ENST00000469790///ENST00000446515	23633	KPNA6|karyopherin alpha 6 (importin alpha 7)	chr1:32108037-32176568				30.8456	20.8807	-0.562894	0.0024	0.00858874
ENSG00000026025	ENST00000478317///ENST00000478746///ENST00000497849///ENST00000224237///ENST00000487938///ENST00000485947///ENST00000469543///ENST00000421459///ENST00000495528///ENST00000544301	7431	VIM|vimentin	chr10:17214238-17237593	GO:0005737|cytoplasm|///GO:0005200|structural constituent of cytoskeleton|///GO:0005856|cytoskeleton|///GO:0008022|protein C-terminus binding|///GO:0005198|structural molecule activity|///GO:0005882|intermediate filament|///GO:0005886|plasma membrane|///GO:0006915|apoptotic process|///GO:0005829|cytosol|///GO:0003725|double-stranded RNA binding|///GO:0005515|protein binding|///GO:0005777|peroxiso…			0.970885	8.65922	3.15686	5e-05	0.00026084
ENSG00000026036	ENST00000492259///ENST00000482936///ENST00000480273///ENST00000496281		RTEL1-TNFRSF6B|	chr20:63657809-63743505				0.604602	0.480741	-0.330726	0.62215	0.769061
ENSG00000026103	ENST00000355740///ENST00000352159///ENST00000484444///ENST00000357339///ENST00000488877///ENST00000494410///ENST00000479522///ENST00000492756///ENST00000355279///ENST00000460510///ENST00000477270///ENST00000313771///ENST00000466081///ENST00000371857///ENST00000494799///ENST00000487314///ENST00000626542///ENST00000615406///ENST00000612663	355	FAS|Fas cell surface death receptor	chr10:88879733-89015785				5.09827	4.11916	-0.307659	0.17795	0.314031
ENSG00000026297	ENST00000366855///ENST00000508775///ENST00000421787///ENST00000510083///ENST00000476238///ENST00000028008///ENST00000478180///ENST00000467705///ENST00000499370///ENST00000358165///ENST00000496851///ENST00000509073///ENST00000611959///ENST00000620173	8635	RNASET2|ribonuclease T2	chr6:166409363-166957191				84.2065	127.734	0.601139	5e-05	0.00026084
ENSG00000026508	ENST00000263398///ENST00000526025///ENST00000415148///ENST00000528086///ENST00000428726///ENST00000526669///ENST00000425428///ENST00000433892///ENST00000278386///ENST00000434472///ENST00000352818///ENST00000442151///ENST00000525211///ENST00000526000///ENST00000279452///ENST00000527889///ENST00000531118///ENST00000528455///ENST00000531873///ENST00000525209///ENST00000531110///ENST00000525685///ENS…	960	CD44|CD44 molecule (Indian blood group)	chr11:35138869-35232402				304.738	84.7677	-1.84598	5e-05	0.00026084
ENSG00000026559	ENST00000371571///ENST00000506387///ENST00000439216///ENST00000424171///ENST00000433903///ENST00000447736	3755	KCNG1|potassium channel, voltage gated modifier subfamily G, member 1	chr20:50999369-51023129				0.282631	1.24963	2.1445	0.00075	0.00307774
ENSG00000026652	ENST00000320285///ENST00000437165///ENST00000436279///ENST00000366905///ENST00000366911	56895	AGPAT4|1-acylglycerol-3-phosphate O-acyltransferase 4	chr6:161129978-161274061				0.00238582	0.128695	5.75333	1	1
ENSG00000026751	ENST00000488819///ENST00000368043///ENST00000368042///ENST00000359331///ENST00000495334///ENST00000484221///ENST00000458104///ENST00000444090///ENST00000458602///ENST00000441662///ENST00000621377	57823	SLAMF7|SLAM family member 7	chr1:160739056-160754821				0	0.105612	18.6778	1	1
ENSG00000026950	ENST00000476549///ENST00000289361///ENST00000465690///ENST00000450085///ENST00000425234///ENST00000427334///ENST00000506698///ENST00000414912///ENST00000082468///ENST00000513047///ENST00000502361	11119	BTN3A1|butyrophilin, subfamily 3, member A1	chr6:26402236-26415216				0.29387	2.1926	2.89939	5e-05	0.00026084
ENSG00000027001	ENST00000464194///ENST00000433710///ENST00000382172///ENST00000494139///ENST00000469167	4285	MIPEP|mitochondrial intermediate peptidase	chr13:23730188-23902655				13.3046	28.3085	1.08931	5e-05	0.00026084
ENSG00000027075	ENST00000555185///ENST00000557294///ENST00000556778///ENST00000555542///ENST00000555906///ENST00000554835///ENST00000332981///ENST00000555082///ENST00000552875///ENST00000553830///ENST00000553831///ENST00000553726///ENST00000553265///ENST00000556164///ENST00000557585///ENST00000557473///ENST00000553889///ENST00000557559///ENST00000555604///ENST00000555233///ENST00000536400///ENST00000555628///ENS…	5583	PRKCH|protein kinase C, eta	chr14:61187558-61658696				21.2322	15.949	-0.412785	0.097	0.19701
ENSG00000027644	ENST00000368195	3645	INSRR|insulin receptor-related receptor	chr1:156806242-156881850				0	0.00370175	18.6778	1	1
ENSG00000027697	ENST00000367739///ENST00000458076///ENST00000414770///ENST00000478333///ENST00000543628	3459	IFNGR1|interferon gamma receptor 1	chr6:137197483-137219449				14.4596	20.1796	0.480869	0.0002	0.000933714
ENSG00000027847	ENST00000029410///ENST00000502420///ENST00000505433///ENST00000510761///ENST00000505468///ENST00000507061///ENST00000505145///ENST00000515353	11285	B4GALT7|xylosylprotein beta 1,4-galactosyltransferase, polypeptide 7	chr5:177600099-177610347				5.13065	6.5492	0.352176	0.17225	0.306646
ENSG00000027869	ENST00000368198///ENST00000368199///ENST00000468744///ENST00000486350///ENST00000495306///ENST00000392306	9047	SH2D2A|SH2 domain containing 2A	chr1:156806242-156881850				0	0.200038	18.6778	1	1
ENSG00000028116	ENST00000435505///ENST00000417641///ENST00000478687///ENST00000463222///ENST00000340157///ENST00000432057///ENST00000440705///ENST00000428021///ENST00000412104	7444	VRK2|vaccinia related kinase 2	chr2:57907650-58241686				17.3157	13.1717	-0.394643	0.04815	0.111389
ENSG00000028137	ENST00000376259///ENST00000492361///ENST00000489921///ENST00000536782	7133	TNFRSF1B|tumor necrosis factor receptor superfamily, member 1B	chr1:12166942-12209228	GO:0005576|extracellular region|///GO:0006955|immune response|///GO:0006954|inflammatory response|///GO:0005886|plasma membrane|///GO:0031625|ubiquitin protein ligase binding|///GO:0005887|integral component of plasma membrane|///GO:0042981|regulation of apoptotic process|///GO:0007275|multicellular organismal development|///GO:0097190|apoptotic signaling pathway|///GO:0042127|regulation of cell …			0	0.0491267	18.6778	1	1
ENSG00000028203	ENST00000549589///ENST00000550803///ENST00000436874///ENST00000547611///ENST00000547997///ENST00000549002///ENST00000546557///ENST00000551746///ENST00000548838///ENST00000547484///ENST00000551472///ENST00000551792///ENST00000553063///ENST00000548455///ENST00000546398///ENST00000552031///ENST00000548822///ENST00000549624///ENST00000548245///ENST00000552626///ENST00000552660///ENST00000551039///ENS…	55591	VEZT|vezatin, adherens junctions transmembrane protein	chr12:95217745-95302790				52.9242	56.5434	0.0954299	0.57775	0.734475
ENSG00000028277	ENST00000389341///ENST00000342301///ENST00000560558///ENST00000526816///ENST00000529067///ENST00000560804///ENST00000534559///ENST00000533548///ENST00000560398///ENST00000529952///ENST00000598842///ENST00000528894///ENST00000526831///ENST00000530982///ENST00000531773///ENST00000524801///ENST00000532176///ENST00000558596///ENST00000625670	5452	POU2F2|POU class 2 homeobox 2	chr19:42086109-42196585				0.0708977	0.118526	0.741397	1	1
ENSG00000028310	ENST00000493082///ENST00000497410///ENST00000483234///ENST00000495794///ENST00000490814///ENST00000495265///ENST00000489816///ENST00000483173///ENST00000467963///ENST00000519112///ENST00000518250///ENST00000523139///ENST00000518251///ENST00000475706///ENST00000466684///ENST00000519838///ENST00000494422///ENST00000489093///ENST00000487688	65980	BRD9|bromodomain containing 9	chr5:795605-919357				28.1915	25.6971	-0.133658	0.5826	0.738552
ENSG00000028528	ENST00000560829///ENST00000559061///ENST00000380285///ENST00000261889///ENST00000559844///ENST00000560260///ENST00000561026///ENST00000558040///ENST00000559389///ENST00000559401///ENST00000559339///ENST00000559961///ENST00000560861///ENST00000625244	6642	SNX1|sorting nexin 1	chr15:64094122-64146090				64.9469	67.3027	0.0514026	0.68765	0.816613
ENSG00000028839	ENST00000416965///ENST00000457715///ENST00000367871///ENST00000237264///ENST00000367869///ENST00000477527///ENST00000481694///ENST00000613034	9519	TBPL1|TBP-like 1	chr6:133952169-134052636				34.239	27.6201	-0.309924	0.1401	0.263002
ENSG00000029153	ENST00000544915///ENST00000395901///ENST00000546179///ENST00000311001///ENST00000261178///ENST00000266503///ENST00000457040///ENST00000539558///ENST00000542388	56938	ARNTL2|aryl hydrocarbon receptor nuclear translocator-like 2	chr12:27332853-27446625				9.83638	2.54451	-1.95074	5e-05	0.00026084
ENSG00000029363	ENST00000531224///ENST00000533422///ENST00000527536///ENST00000527613///ENST00000530767///ENST00000527759///ENST00000534269///ENST00000529522///ENST00000532384///ENST00000530429///ENST00000534762///ENST00000529917///ENST00000392348///ENST00000526228///ENST00000534321///ENST00000534792///ENST00000532076///ENST00000529826///ENST00000476194///ENST00000533621///ENST00000528229///ENST00000353331///ENS…	9774	BCLAF1|BCL2-associated transcription factor 1	chr6:136256862-136289851				174.051	107.071	-0.700941	0.0004	0.00175048
ENSG00000029364	ENST00000556125///ENST00000555245///ENST00000538956///ENST00000556605///ENST00000628474///ENST00000336643///ENST00000031146///ENST00000554059///ENST00000555840///ENST00000557046///ENST00000554023	55334	SLC39A9|solute carrier family 39, member 9	chr14:69380122-69462388				37.3489	35.5337	-0.071876	0.7328	0.846577
ENSG00000029534	ENST00000347528///ENST00000289734///ENST00000522231///ENST00000522543///ENST00000314214///ENST00000520299///ENST00000265709///ENST00000348036///ENST00000524227///ENST00000335651///ENST00000518715///ENST00000518061///ENST00000524069///ENST00000521407	286	ANK1|ankyrin 1, erythrocytic	chr8:41653219-41896762				0.793954	0.336024	-1.24049	0.0054	0.0173372
ENSG00000029559	ENST00000226284	3381	IBSP|integrin-binding sialoprotein	chr4:87799580-87812435	GO:0005615|extracellular space|///GO:0005576|extracellular region|///GO:0016020|membrane|///GO:0007155|cell adhesion|///GO:0031012|extracellular matrix|///GO:0031988|membrane-bounded vesicle|///GO:0003674|molecular_function|///GO:0030198|extracellular matrix organization|///GO:0001503|ossification|///GO:0071363|cellular response to growth factor stimulus|///GO:0001649|osteoblast differentiation|/…			0.365129	0.631201	0.789692	0.00595	0.0188625
ENSG00000029639	ENST00000367166///ENST00000468889///ENST00000470239///ENST00000495806///ENST00000489874///ENST00000487586///ENST00000475849///ENST00000480390///ENST00000466349	51106	TFB1M|transcription factor B1, mitochondrial	chr6:154733324-155314493	GO:0003677|DNA binding|///GO:0006355|regulation of transcription, DNA-templated|///GO:0006351|transcription, DNA-templated|///GO:0044822|poly(A) RNA binding|///GO:0005759|mitochondrial matrix|///GO:0005515|protein binding|///GO:0000179|rRNA (adenine-N6,N6-)-dimethyltransferase activity|///GO:0031167|rRNA methylation|///GO:0008649|rRNA methyltransferase activity|///GO:0006996|organelle organizatio…			7.6093	9.0649	0.252527	0.6501	0.790376
ENSG00000029725	ENST00000575991///ENST00000537505///ENST00000575475///ENST00000341923///ENST00000570487///ENST00000574568///ENST00000572250	9135	RABEP1|rabaptin, RAB GTPase binding effector protein 1	chr17:5282264-5469060				38.426	29.7033	-0.371459	0.15905	0.289928
ENSG00000029993	ENST00000419110///ENST00000325307///ENST00000455596///ENST00000430118///ENST00000448905	3149	HMGB3|high mobility group box 3	chrX:150980508-150990775				212.491	154.515	-0.459659	0.002	0.00729827
ENSG00000030066	ENST00000378460///ENST00000530326///ENST00000532773///ENST00000528071///ENST00000526569///ENST00000527750///ENST00000528501///ENST00000531016///ENST00000527126///ENST00000526870///ENST00000529863	23279	NUP160|nucleoporin 160kDa	chr11:47778086-47848555				60.0783	19.2047	-1.64538	5e-05	0.00026084
ENSG00000030110	ENST00000374467///ENST00000442998///ENST00000360661	578	BAK1|BCL2-antagonist/killer 1	chr6:33540045-33593338				11.8223	18.4226	0.639965	5e-05	0.00026084
ENSG00000030304	ENST00000374448///ENST00000416899///ENST00000189978///ENST00000374439///ENST00000634612///ENST00000374438///ENST00000374440	4593	MUSK|muscle, skeletal, receptor tyrosine kinase	chr9:110668770-110801579	GO:0004672|protein kinase activity|///GO:0005524|ATP binding|///GO:0006468|protein phosphorylation|///GO:0046872|metal ion binding|///GO:0004714|transmembrane receptor protein tyrosine kinase activity|///GO:0018108|peptidyl-tyrosine phosphorylation|///GO:0030154|cell differentiation|///GO:0005887|integral component of plasma membrane|///GO:0007169|transmembrane receptor protein tyrosine kinase si…			0	0	0	1	1
ENSG00000030419	ENST00000342002///ENST00000434687///ENST00000484040///ENST00000374319///ENST00000453575///ENST00000412444///ENST00000439848///ENST00000374326///ENST00000431520///ENST00000433134///ENST00000452786///ENST00000442445///ENST00000457361///ENST00000451136	22807	IKZF2|IKAROS family zinc finger 2 (Helios)	chr2:212581356-213152427				4.29539	1.97271	-1.12261	5e-05	0.00026084
ENSG00000030582	ENST00000053867///ENST00000588170///ENST00000589536///ENST00000587109///ENST00000587518///ENST00000588143///ENST00000593167///ENST00000585512///ENST00000592323///ENST00000591740///ENST00000592783///ENST00000587387///ENST00000588237///ENST00000589265///ENST00000587958///ENST00000586782///ENST00000590984///ENST00000586443///ENST00000589923///ENST00000585348///ENST00000586242	2896	GRN|granulin	chr17:44345085-44353102	GO:0008083|growth factor activity|///GO:0043231|intracellular membrane-bounded organelle|///GO:0007165|signal transduction|///GO:0005125|cytokine activity|///GO:0044822|poly(A) RNA binding|///GO:0005515|protein binding|///GO:0070062|extracellular exosome|///GO:0005615|extracellular space|///GO:0005739|mitochondrion|///GO:0050679|positive regulation of epithelial cell proliferation|///GO:0007566|e…			85.2963	209.106	1.29368	5e-05	0.00026084
ENSG00000031003	ENST00000033079///ENST00000425075///ENST00000420893///ENST00000513640///ENST00000505281///ENST00000514310///ENST00000502471///ENST00000509596///ENST00000508403///ENST00000505961///ENST00000510804	51306	FAM13B|family with sequence similarity 13, member B	chr5:137814332-138051961				17.9252	12.4089	-0.530619	5e-05	0.00026084
ENSG00000031081	ENST00000264245///ENST00000482743	57514	ARHGAP31|Rho GTPase activating protein 31	chr3:119294372-119420714				0.059703	0.390665	2.71006	0.00085	0.00344705
ENSG00000031691	ENST00000335783	55166	CENPQ|centromere protein Q	chr6:49463377-49493107				17.0956	7.84023	-1.12466	5e-05	0.00026084
ENSG00000031698	ENST00000234677///ENST00000482384///ENST00000477544///ENST00000369923///ENST00000471705///ENST00000468588	6301	SARS|seryl-tRNA synthetase	chr1:109213917-109238169	GO:0005524|ATP binding|///GO:0000166|nucleotide binding|///GO:0003723|RNA binding|///GO:0006412|translation|///GO:0005737|cytoplasm|///GO:0005829|cytosol|///GO:0008033|tRNA processing|///GO:0070062|extracellular exosome|///GO:0010467|gene expression|///GO:0004828|serine-tRNA ligase activity|///GO:0006434|seryl-tRNA aminoacylation|///GO:0004812|aminoacyl-tRNA ligase activity|///GO:0006418|tRNA ami…			183.377	226.815	0.306699	0.00565	0.0180543
ENSG00000031823	ENST00000439268///ENST00000340578///ENST00000592771///ENST00000586344///ENST00000591092///ENST00000034275///ENST00000587479///ENST00000592197///ENST00000587411///ENST00000592621///ENST00000587799///ENST00000590623///ENST00000591736///ENST00000593025///ENST00000590953///ENST00000588879///ENST00000587159///ENST00000586117///ENST00000589353///ENST00000587463///ENST00000588010///ENST00000585339///ENS…	8498	RANBP3|RAN binding protein 3	chr19:5904840-5978142				35.8159	28.8256	-0.31325	0.17275	0.307285
ENSG00000032219	ENST00000355431///ENST00000395168///ENST00000431612///ENST00000445108///ENST00000424658///ENST00000431317///ENST00000417477///ENST00000553355///ENST00000469635///ENST00000466065///ENST00000348476	5926	ARID4A|AT rich interactive domain 4A (RBP1-like)	chr14:58298384-58395641	GO:0003677|DNA binding|///GO:0006357|regulation of transcription from RNA polymerase II promoter|///GO:0005634|nucleus|///GO:0003700|transcription factor activity, sequence-specific DNA binding|///GO:0044212|transcription regulatory region DNA binding|///GO:0045892|negative regulation of transcription, DNA-templated|///GO:0006366|transcription from RNA polymerase II promoter|///GO:0005654|nucleop…			28.7959	17.013	-0.759222	0.0179	0.0486888
ENSG00000032389	ENST00000478754///ENST00000398659///ENST00000382125///ENST00000496433///ENST00000455162///ENST00000441271///ENST00000463662///ENST00000482570///ENST00000435721///ENST00000470625///ENST00000443925///ENST00000406835///ENST00000462515///ENST00000444776	7260	TSSC1|tumor suppressing subtransferable candidate 1	chr2:3188924-3377882				21.0039	22.0524	0.0702786	0.656	0.794597
ENSG00000032444	ENST00000221249///ENST00000594754///ENST00000601668///ENST00000594098///ENST00000601001///ENST00000545201///ENST00000596515///ENST00000414982///ENST00000450331///ENST00000600942///ENST00000593924///ENST00000600737///ENST00000602191///ENST00000598462///ENST00000595264///ENST00000594551///ENST00000599311///ENST00000595176///ENST00000595889///ENST00000594864///ENST00000599951///ENST00000595352///ENS…	10908	PNPLA6|patatin-like phospholipase domain containing 6	chr19:7522625-7561764				5.17417	5.36384	0.0519375	0.84935	0.914054
ENSG00000032742	ENST00000351808///ENST00000319980///ENST00000389373///ENST00000537103///ENST00000461115///ENST00000482172///ENST00000470695	8100	IFT88|intraflagellar transport 88	chr13:20567068-20691437	GO:0031514|motile cilium|///GO:0060271|cilium morphogenesis|///GO:0072372|primary cilium|///GO:0005814|centriole|///GO:0005515|protein binding|///GO:0005929|cilium|///GO:0006996|organelle organization|///GO:0030992|intraciliary transport particle B|///GO:0097542|ciliary tip|///GO:0036064|ciliary basal body|///GO:1902017|regulation of cilium assembly|///GO:2000785|regulation of autophagosome assem…			12.4463	15.9068	0.353921	0.0446	0.104606
ENSG00000033011	ENST00000588623///ENST00000262374///ENST00000586840///ENST00000592793///ENST00000591822///ENST00000591783///ENST00000544428///ENST00000592661	56052	ALG1|ALG1, chitobiosyldiphosphodolichol beta-mannosyltransferase	chr16:4882506-5097808				12.9052	21.3864	0.728749	0.04495	0.105114
ENSG00000033030	ENST00000543897///ENST00000536306///ENST00000538116///ENST00000633063///ENST00000542892///ENST00000544054///ENST00000536663///ENST00000546149///ENST00000540586///ENST00000538493	55596	ZCCHC8|zinc finger, CCHC domain containing 8	chr12:122471599-122501073				22.317	20.1	-0.150949	0.25655	0.411167
ENSG00000033050	ENST00000222388///ENST00000287844///ENST00000473874///ENST00000468073///ENST00000441774///ENST00000477252	10061	ABCF2|ATP-binding cassette, sub-family F (GCN20), member 2	chr7:151207836-151227230	GO:0005524|ATP binding|///GO:0008152|metabolic process|///GO:0005215|transporter activity|///GO:0016887|ATPase activity|///GO:0016020|membrane|///GO:0006810|transport|///GO:0005740|mitochondrial envelope|///GO:0043190|ATP-binding cassette (ABC) transporter complex|///GO:0005739|mitochondrion|			45.6691	45.2736	-0.0125498	0.93885	0.962024
ENSG00000033100	ENST00000482173///ENST00000495645///ENST00000035307///ENST00000465601	54480	CHPF2|chondroitin polymerizing factor 2	chr7:151232488-151277896				8.93735	17.3463	0.956709	5e-05	0.00026084
ENSG00000033122	ENST00000310961///ENST00000370958///ENST00000035383///ENST00000588515///ENST00000609498///ENST00000608815///ENST00000608744///ENST00000609072///ENST00000608470///ENST00000607936///ENST00000565615///ENST00000441830///ENST00000415775	57554	LRRC7|leucine rich repeat containing 7	chr1:69568397-70205620				0.349836	0.290534	-0.26797	0.7653	0.86684
ENSG00000033170	ENST00000360689///ENST00000394586///ENST00000556518///ENST00000342677///ENST00000557164///ENST00000549235///ENST00000555559///ENST00000553924///ENST00000358307///ENST00000557338///ENST00000554610///ENST00000556292///ENST00000554667///ENST00000557536///ENST00000554765	2530	FUT8|fucosyltransferase 8 (alpha (1,6) fucosyltransferase)	chr14:65410591-65744121	GO:0016021|integral component of membrane|///GO:0005737|cytoplasm|///GO:0016020|membrane|///GO:0000139|Golgi membrane|///GO:0005794|Golgi apparatus|///GO:0006487|protein N-linked glycosylation|///GO:0005515|protein binding|///GO:0006491|N-glycan processing|///GO:0018279|protein N-linked glycosylation via asparagine|///GO:0070062|extracellular exosome|///GO:0044267|cellular protein metabolic proce…			174.107	72.5283	-1.26336	5e-05	0.00026084
ENSG00000033178	ENST00000322244///ENST00000514261///ENST00000505673///ENST00000420827///ENST00000429659///ENST00000506571	55236	UBA6|ubiquitin-like modifier activating enzyme 6	chr4:67612651-67701179				48.5178	36.7928	-0.399092	0.10935	0.21667
ENSG00000033327	ENST00000340149///ENST00000361507///ENST00000528329///ENST00000526030///ENST00000528886///ENST00000530915///ENST00000534823	9846	GAB2|GRB2-associated binding protein 2	chr11:78215296-78574874	GO:0005737|cytoplasm|///GO:0005886|plasma membrane|///GO:0005829|cytosol|///GO:0007169|transmembrane receptor protein tyrosine kinase signaling pathway|///GO:0045087|innate immune response|///GO:0008284|positive regulation of cell proliferation|///GO:0043306|positive regulation of mast cell degranulation|///GO:0048015|phosphatidylinositol-mediated signaling|///GO:0005515|protein binding|///GO:003…			12.4029	7.77683	-0.673423	0.00055	0.00234422
ENSG00000033627	ENST00000393829///ENST00000588629///ENST00000588901///ENST00000537728///ENST00000264649///ENST00000585525///ENST00000343619///ENST00000589727///ENST00000587824///ENST00000589213///ENST00000592324///ENST00000587375///ENST00000586001///ENST00000587882///ENST00000589759///ENST00000586315///ENST00000587510///ENST00000586201///ENST00000588138///ENST00000585828///ENST00000588806///ENST00000592831///ENS…	535	ATP6V0A1|ATPase, H+ transporting, lysosomal V0 subunit a1	chr17:42458843-42522611				32.1188	16.7591	-0.938474	5e-05	0.00026084
ENSG00000033800	ENST00000249636///ENST00000564915///ENST00000562190///ENST00000545237///ENST00000564009///ENST00000567417///ENST00000563996///ENST00000611270	8554	PIAS1|protein inhibitor of activated STAT, 1	chr15:68054178-68257211				22.7658	12.6448	-0.848327	0.0007	0.00289617
ENSG00000033867	ENST00000419036///ENST00000295736///ENST00000428386///ENST00000454389///ENST00000440156///ENST00000457377///ENST00000438530///ENST00000437179///ENST00000446700///ENST00000455077///ENST00000445684///ENST00000465487///ENST00000437266///ENST00000428179///ENST00000475120///ENST00000491211///ENST00000428005///ENST00000425128	9497	SLC4A7|solute carrier family 4, sodium bicarbonate cotransporter, member 7	chr3:27372720-27484420				24.6196	9.04192	-1.44511	5e-05	0.00026084
ENSG00000034053	ENST00000561069///ENST00000558402///ENST00000558330///ENST00000559814///ENST00000559709///ENST00000558804///ENST00000560283///ENST00000558206///ENST00000558358///ENST00000382938///ENST00000558259///ENST00000411764	321	APBA2|amyloid beta (A4) precursor protein-binding, family A, member 2	chr15:28884482-29118315				0.378287	0.828005	1.13016	0.00025	0.00114777
ENSG00000034152	ENST00000395491///ENST00000342679///ENST00000534743///ENST00000529517///ENST00000483928///ENST00000479129///ENST00000583508///ENST00000496046///ENST00000526076///ENST00000316920///ENST00000477540///ENST00000527123///ENST00000613338///ENST00000361818///ENST00000627447	5606	MAP2K3|mitogen-activated protein kinase kinase 3	chr17:21284671-21315240				15.1241	22.2276	0.555505	0.00135	0.00518252
ENSG00000034239	ENST00000521002///ENST00000523008///ENST00000521701///ENST00000262103///ENST00000522254///ENST00000523092///ENST00000519425///ENST00000521721///ENST00000433756	79645	EFCAB1|EF-hand calcium binding domain 1	chr8:48710788-48735311	GO:0005509|calcium ion binding|			0	0	0	1	1
ENSG00000034510	ENST00000233143	9168	TMSB10|thymosin beta 10	chr2:84821649-84907008				1931.31	4107.64	1.08873	5e-05	0.00026084
ENSG00000034533	ENST00000514044///ENST00000264992///ENST00000507978///ENST00000505290///ENST00000504964///ENST00000505545///ENST00000504725///ENST00000509060	28990	ASTE1|asteroid homolog 1 (Drosophila)	chr3:130850594-131381475				12.8824	10.42	-0.306037	0.5213	0.686621
ENSG00000034677	ENST00000519449///ENST00000341084///ENST00000520903///ENST00000523255///ENST00000523644///ENST00000520071///ENST00000524233///ENST00000519527///ENST00000523167///ENST00000522369///ENST00000517584///ENST00000432381///ENST00000523481///ENST00000522182///ENST00000519342///ENST00000616528	25897	RNF19A|ring finger protein 19A, RBR E3 ubiquitin protein ligase	chr8:100157905-100414459				53.6859	60.4599	0.171434	0.67725	0.809402
ENSG00000034693	ENST00000367592///ENST00000367591///ENST00000585848	8504	PEX3|peroxisomal biogenesis factor 3	chr6:143450806-143511690				31.6695	38.3485	0.276076	0.56175	0.72161
ENSG00000034713	ENST00000037243///ENST00000565057///ENST00000563744///ENST00000568455///ENST00000565985	11345	GABARAPL2|GABA(A) receptor-associated protein like 2	chr16:75528531-75623300	GO:0005737|cytoplasm|///GO:0005622|intracellular|///GO:0015031|protein transport|///GO:0006914|autophagy|///GO:0008017|microtubule binding|///GO:0005829|cytosol|///GO:0031625|ubiquitin protein ligase binding|///GO:0000139|Golgi membrane|///GO:0000045|autophagosome assembly|///GO:0000407|pre-autophagosomal structure|///GO:0006995|cellular response to nitrogen starvation|///GO:0044804|nucleophagy|/…			149.012	183.042	0.296745	0.05715	0.128486
ENSG00000034971	ENST00000037502///ENST00000614688	4653	MYOC|myocilin, trabecular meshwork inducible glucocorticoid response	chr1:171635416-171652683	GO:0005615|extracellular space|///GO:0046872|metal ion binding|///GO:0005743|mitochondrial inner membrane|///GO:0005578|proteinaceous extracellular matrix|///GO:0031012|extracellular matrix|///GO:0005783|endoplasmic reticulum|///GO:0016023|cytoplasmic membrane-bounded vesicle|///GO:0043408|regulation of MAPK cascade|///GO:0005794|Golgi apparatus|///GO:0005109|frizzled binding|///GO:0045162|cluste…			0	0	0	1	1
ENSG00000035115	ENST00000460974///ENST00000403712///ENST00000626873///ENST00000463865///ENST00000403657///ENST00000473104///ENST00000405430///ENST00000356150///ENST00000403658///ENST00000468321///ENST00000479739///ENST00000451005///ENST00000472012///ENST00000431160///ENST00000471948///ENST00000481932///ENST00000488044///ENST00000497051///ENST00000488979///ENST00000475027///ENST00000454318///ENST00000402632///ENS…	26751	SH3YL1|SH3 and SYLF domain containing 1	chr2:217729-278283	GO:0035091|phosphatidylinositol binding|///GO:0005515|protein binding|///GO:0019902|phosphatase binding|///GO:0032587|ruffle membrane|///GO:1900027|regulation of ruffle assembly|///GO:0006661|phosphatidylinositol biosynthetic process|			36.4606	69.3236	0.927009	0.0006	0.00252716
ENSG00000035141	ENST00000037869///ENST00000460307///ENST00000450256///ENST00000430566///ENST00000438759///ENST00000498665	84908	FAM136A|family with sequence similarity 136, member A	chr2:70295974-70302090				75.2904	62.2034	-0.275473	0.01675	0.0460391
ENSG00000035403	ENST00000623461///ENST00000624354///ENST00000372755///ENST00000478896///ENST00000461383///ENST00000436396///ENST00000472585///ENST00000211998	7414	VCL|vinculin	chr10:73995192-74151063				25.5198	13.9557	-0.870763	0.0023	0.00827309
ENSG00000035499	ENST00000265036///ENST00000453022///ENST00000512078///ENST00000509006///ENST00000505017///ENST00000512452	55789	DEPDC1B|DEP domain containing 1B	chr5:60596911-60700190				26.5126	9.57044	-1.47002	5e-05	0.00026084
ENSG00000035664	ENST00000559007///ENST00000457488///ENST00000559731///ENST00000558064///ENST00000557867///ENST00000612884///ENST00000558076///ENST00000558482///ENST00000559897///ENST00000561162///ENST00000559306///ENST00000261891///ENST00000558069	23604	DAPK2|death-associated protein kinase 2	chr15:63907035-64072033				5.84372	3.07524	-0.926185	0.00015	0.000719971
ENSG00000035681	ENST00000038176///ENST00000427130///ENST00000521972///ENST00000517612///ENST00000521712///ENST00000523177///ENST00000519166///ENST00000524148///ENST00000523106///ENST00000519174///ENST00000523982///ENST00000519227///ENST00000519858///ENST00000518229///ENST00000518159///ENST00000522645///ENST00000519871	8439	NSMAF|neutral sphingomyelinase (N-SMase) activation associated factor	chr8:58583503-58659844	GO:0005737|cytoplasm|///GO:0035556|intracellular signal transduction|///GO:0007165|signal transduction|///GO:0016197|endosomal transport|///GO:0005829|cytosol|///GO:0005543|phospholipid binding|///GO:0012505|endomembrane system|///GO:0007166|cell surface receptor signaling pathway|///GO:0019898|extrinsic component of membrane|///GO:0005515|protein binding|///GO:0033209|tumor necrosis factor-media…			57.9635	43.9375	-0.399694	0.0636	0.140163
ENSG00000035687	ENST00000366535///ENST00000468215///ENST00000462358	159	ADSS|adenylosuccinate synthase	chr1:244352634-244452134	GO:0005525|GTP binding|///GO:0000287|magnesium ion binding|///GO:0005737|cytoplasm|///GO:0005886|plasma membrane|///GO:0005829|cytosol|///GO:0044208|'de novo' AMP biosynthetic process|///GO:0005515|protein binding|///GO:0070062|extracellular exosome|///GO:0044281|small molecule metabolic process|///GO:0006144|purine nucleobase metabolic process|///GO:0006164|purine nucleotide biosynthetic process…			33.9169	35.2837	0.0569988	0.6616	0.799015
ENSG00000035720	ENST00000265404///ENST00000396225	26228	STAP1|signal transducing adaptor family member 1	chr4:67558727-67607337	GO:0005634|nucleus|///GO:0005739|mitochondrion|///GO:0005737|cytoplasm|///GO:0007169|transmembrane receptor protein tyrosine kinase signaling pathway|///GO:0005543|phospholipid binding|///GO:0019901|protein kinase binding|///GO:0005515|protein binding|///GO:0010628|positive regulation of gene expression|///GO:0071222|cellular response to lipopolysaccharide|///GO:0043234|protein complex|///GO:2000…			0	0	0	1	1
ENSG00000035862	ENST00000585421///ENST00000536189///ENST00000262768///ENST00000586057///ENST00000592761	7077	TIMP2|TIMP metallopeptidase inhibitor 2	chr17:78852976-78925387	GO:0005615|extracellular space|///GO:0005578|proteinaceous extracellular matrix|///GO:0010951|negative regulation of endopeptidase activity|///GO:0034097|response to cytokine|///GO:0005515|protein binding|///GO:0002020|protease binding|///GO:0008191|metalloendopeptidase inhibitor activity|///GO:0009725|response to hormone|///GO:0048553|negative regulation of metalloenzyme activity|///GO:0051045|n…			27.1871	40.576	0.5777	5e-05	0.00026084
ENSG00000035928	ENST00000349703///ENST00000381897///ENST00000510783///ENST00000502991///ENST00000504974///ENST00000514572///ENST00000505077///ENST00000504554///ENST00000502706///ENST00000509084///ENST00000512881///ENST00000512726///ENST00000418436///ENST00000504849///ENST00000512275///ENST00000503784	5981	RFC1|replication factor C (activator 1) 1, 145kDa	chr4:39287455-39366375				85.0518	37.9417	-1.16456	5e-05	0.00026084
ENSG00000036054	ENST00000485687///ENST00000344949///ENST00000394144///ENST00000486274///ENST00000471098///ENST00000475134///ENST00000484231///ENST00000496167///ENST00000471273	55773	TBC1D23|TBC1 domain family, member 23	chr3:100260999-100325251	GO:0005515|protein binding|///GO:0032680|regulation of tumor necrosis factor production|///GO:0032755|positive regulation of interleukin-6 production|///GO:0050727|regulation of inflammatory response|			24.6197	20.4251	-0.269471	0.1203	0.233628
ENSG00000036257	ENST00000264414///ENST00000497715///ENST00000454323///ENST00000409096///ENST00000409777///ENST00000451538///ENST00000536702///ENST00000487558///ENST00000481135///ENST00000484081///ENST00000541548///ENST00000432260///ENST00000436172///ENST00000546102///ENST00000344951///ENST00000617432	8452	CUL3|cullin 3	chr2:224464681-224585397	GO:0007411|axon guidance|///GO:0006511|ubiquitin-dependent protein catabolic process|///GO:0042787|protein ubiquitination involved in ubiquitin-dependent protein catabolic process|///GO:0004842|ubiquitin-protein transferase activity|///GO:0016020|membrane|///GO:0007264|small GTPase mediated signal transduction|///GO:0043161|proteasome-mediated ubiquitin-dependent protein catabolic process|///GO:0…			96.9816	98.0758	0.0161876	0.9133	0.947317
ENSG00000036448	ENST00000262113///ENST00000523438///ENST00000519518///ENST00000518803///ENST00000519372///ENST00000518203///ENST00000517520///ENST00000523443///ENST00000520072///ENST00000519631///ENST00000612167///ENST00000621894///ENST00000520298///ENST00000520779///ENST00000518513	9172	MYOM2|myomesin 2	chr8:2045039-2165552				0.00169427	0.0476981	4.8152	1	1
ENSG00000036473	ENST00000039007///ENST00000488812	5009	OTC|ornithine carbamoyltransferase	chrX:37349274-38688920				0	0	0	1	1
ENSG00000036530	ENST00000554611///ENST00000261835///ENST00000380228///ENST00000554176///ENST00000554917///ENST00000556313///ENST00000556822	10858	CYP46A1|cytochrome P450, family 46, subfamily A, polypeptide 1	chr14:99684303-99727301				0.507884	0.489864	-0.0521166	0.8752	0.927738
ENSG00000036549	ENST00000481346///ENST00000370801///ENST00000476275///ENST00000370798///ENST00000476195///ENST00000474746///ENST00000433749///ENST00000414381///ENST00000463166///ENST00000469944///ENST00000458763	26009	ZZZ3|zinc finger, ZZ-type containing 3	chr1:77562415-77683419				23.8777	20.9462	-0.18897	0.1286	0.246168
ENSG00000036565	ENST00000265808///ENST00000276373///ENST00000517776///ENST00000519026///ENST00000381608///ENST00000519171///ENST00000522513///ENST00000524272///ENST00000440926///ENST00000437980	6570	SLC18A1|solute carrier family 18 (vesicular monoamine transporter), member 1	chr8:20144854-20183206				0	0	0	1	1
ENSG00000036672	ENST00000455332///ENST00000260187///ENST00000525735///ENST00000525189///ENST00000532613///ENST00000531070///ENST00000527843	9099	USP2|ubiquitin specific peptidase 2	chr11:119355214-119381726				1.68089	1.97242	0.230737	0.3372	0.504939
ENSG00000036828	ENST00000490131///ENST00000498619///ENST00000490186	846	CASR|calcium-sensing receptor	chr3:122183682-122286503				0	0.00565001	18.6778	1	1
ENSG00000037042	ENST00000251412///ENST00000588870///ENST00000590396	27175	TUBG2|tubulin, gamma 2	chr17:42659304-42667006				9.51076	8.22189	-0.21009	0.227	0.376467
ENSG00000037241	ENST00000519974///ENST00000521476///ENST00000265100///ENST00000519239///ENST00000519522///ENST00000519156	51121	RPL26L1|ribosomal protein L26-like 1	chr5:172954785-172969771	GO:0003735|structural constituent of ribosome|///GO:0006412|translation|///GO:0006414|translational elongation|///GO:0005840|ribosome|///GO:0005622|intracellular|///GO:0005829|cytosol|///GO:0042273|ribosomal large subunit biogenesis|///GO:0006413|translational initiation|///GO:0015934|large ribosomal subunit|///GO:0006614|SRP-dependent cotranslational protein targeting to membrane|///GO:0006415|t…			73.5073	67.1674	-0.130125	0.56945	0.728071
ENSG00000037280	ENST00000261937///ENST00000502603///ENST00000507059///ENST00000393347///ENST00000502649///ENST00000510000///ENST00000514810///ENST00000512795///ENST00000424276///ENST00000502293///ENST00000513527///ENST00000619105	2324	FLT4|fms-related tyrosine kinase 4	chr5:180601505-180649624	GO:0004672|protein kinase activity|///GO:0005524|ATP binding|///GO:0006468|protein phosphorylation|///GO:0005021|vascular endothelial growth factor-activated receptor activity|///GO:0038084|vascular endothelial growth factor signaling pathway|///GO:0005576|extracellular region|///GO:0005634|nucleus|///GO:0005737|cytoplasm|///GO:0016020|membrane|///GO:0005886|plasma membrane|///GO:0004714|transmem…			0.0958809	0.126618	0.401171	1	1
ENSG00000037474	ENST00000264670///ENST00000504374///ENST00000505892///ENST00000513888///ENST00000506139///ENST00000514127///ENST00000502932///ENST00000507888///ENST00000505264	54888	NSUN2|NOP2/Sun RNA methyltransferase family, member 2	chr5:6599238-6633291	GO:0051301|cell division|///GO:0005634|nucleus|///GO:0005737|cytoplasm|///GO:0005730|nucleolus|///GO:0008168|methyltransferase activity|///GO:0005654|nucleoplasm|///GO:0008033|tRNA processing|///GO:0007067|mitotic nuclear division|///GO:0044822|poly(A) RNA binding|///GO:0005819|spindle|///GO:0000049|tRNA binding|///GO:0006400|tRNA modification|///GO:0010467|gene expression|///GO:0030488|tRNA meth…			72.8627	71.0484	-0.0363785	0.8254	0.89947
ENSG00000037637	ENST00000375592///ENST00000456164///ENST00000444116///ENST00000478089	54455	FBXO42|F-box protein 42	chr1:16246838-16352454				10.2446	11.0714	0.111976	0.6021	0.753959
ENSG00000037749	ENST00000522782///ENST00000439768///ENST00000520327///ENST00000521527///ENST00000322602///ENST00000522177///ENST00000520899///ENST00000519928///ENST00000522440///ENST00000518497///ENST00000519612///ENST00000519325	4238	MFAP3|microfibrillar-associated protein 3	chr5:153990127-154445850				24.2192	11.5206	-1.07194	5e-05	0.00026084
ENSG00000037757	ENST00000588526///ENST00000319545///ENST00000593245///ENST00000591688///ENST00000040663///ENST00000589290	84245	MRI1|methylthioribose-1-phosphate isomerase 1	chr19:13764531-13778462				9.41947	5.06783	-0.894276	0.00045	0.0019463
ENSG00000037897	ENST00000324871///ENST00000257848///ENST00000547653///ENST00000548504///ENST00000551117///ENST00000553125///ENST00000548681///ENST00000549773	4234	METTL1|methyltransferase like 1	chr12:57762333-57818704				57.4661	65.0508	0.178855	0.48075	0.649825
ENSG00000037965	ENST00000040584	3224	HOXC8|homeobox C8	chr12:53981508-54056030	GO:0003677|DNA binding|///GO:0006355|regulation of transcription, DNA-templated|///GO:0003700|transcription factor activity, sequence-specific DNA binding|///GO:0006351|transcription, DNA-templated|///GO:0043565|sequence-specific DNA binding|///GO:0005654|nucleoplasm|///GO:0015630|microtubule cytoskeleton|///GO:0000122|negative regulation of transcription from RNA polymerase II promoter|///GO:000…			0.067413	0.871866	3.69301	0.07145	0.153887
ENSG00000038002	ENST00000264595///ENST00000502310///ENST00000506853///ENST00000510635///ENST00000510955///ENST00000511231	175	AGA|aspartylglucosaminidase	chr4:177430769-177442503	GO:0006508|proteolysis|///GO:0005615|extracellular space|///GO:0005764|lysosome|///GO:0016787|hydrolase activity|///GO:0008233|peptidase activity|///GO:0005783|endoplasmic reticulum|///GO:0070062|extracellular exosome|///GO:0006517|protein deglycosylation|///GO:0003948|N4-(beta-N-acetylglucosaminyl)-L-asparaginase activity|///GO:0051604|protein maturation|///GO:0043621|protein self-association|//…			42.1139	46.1041	0.130597	0.5302	0.693836
ENSG00000038210	ENST00000264864	55300	PI4K2B|phosphatidylinositol 4-kinase type 2 beta	chr4:25160640-25279092				16.5883	11.8153	-0.489506	0.001	0.00398539
ENSG00000038219	ENST00000040738///ENST00000507943///ENST00000505343///ENST00000509897///ENST00000511119///ENST00000482713	259282	BOD1L1|biorientation of chromosomes in cell division 1-like 1	chr4:13568737-13627723				20.4442	24.0371	0.233577	0.6691	0.803968
ENSG00000038274	ENST00000280969///ENST00000519719///ENST00000321757///ENST00000421814///ENST00000518095///ENST00000523606///ENST00000520449///ENST00000521838	27430	MAT2B|methionine adenosyltransferase II, beta	chr5:163503113-163519336	GO:0005634|nucleus|///GO:0005622|intracellular|///GO:0006805|xenobiotic metabolic process|///GO:0005829|cytosol|///GO:0032259|methylation|///GO:0050790|regulation of catalytic activity|///GO:0006730|one-carbon metabolic process|///GO:0005515|protein binding|///GO:0070062|extracellular exosome|///GO:0044281|small molecule metabolic process|///GO:0019899|enzyme binding|///GO:0006556|S-adenosylmethi…			40.5979	32.9781	-0.299895	0.01385	0.0393061
ENSG00000038295	ENST00000061240///ENST00000509505///ENST00000507499///ENST00000504560///ENST00000513213///ENST00000506144	7092	TLL1|tolloid-like 1	chr4:165873257-166103895				0	0.00577356	18.6778	1	1
ENSG00000038358	ENST00000358933///ENST00000572221///ENST00000536072///ENST00000574770///ENST00000573992///ENST00000572031///ENST00000577028///ENST00000576972///ENST00000572724///ENST00000575514///ENST00000575507///ENST00000577105///ENST00000573985///ENST00000575033	23644	EDC4|enhancer of mRNA decapping 4	chr16:67873022-67888855				84.5539	54.9956	-0.620554	0.0001	0.000496109
ENSG00000038382	ENST00000505971///ENST00000502816///ENST00000344204///ENST00000512070///ENST00000509967///ENST00000504606///ENST00000513206///ENST00000515144///ENST00000510757///ENST00000502490///ENST00000509354///ENST00000512303///ENST00000512979///ENST00000507714///ENST00000515710///ENST00000506611///ENST00000511019///ENST00000510281///ENST00000344135///ENST00000503399///ENST00000508343///ENST00000508283///ENS…	7204	TRIO|trio Rho guanine nucleotide exchange factor	chr5:14143701-14532128	GO:0004672|protein kinase activity|///GO:0005524|ATP binding|///GO:0006468|protein phosphorylation|///GO:0007411|axon guidance|///GO:0007264|small GTPase mediated signal transduction|///GO:0043547|positive regulation of GTPase activity|///GO:0005829|cytosol|///GO:0005089|Rho guanyl-nucleotide exchange factor activity|///GO:0035023|regulation of Rho protein signal transduction|///GO:0004674|protei…			25.8882	37.9346	0.55122	0.0061	0.0192758
ENSG00000038427	ENST00000265077///ENST00000503923///ENST00000512590///ENST00000513960///ENST00000513984///ENST00000502527///ENST00000515397///ENST00000513016///ENST00000507162///ENST00000505615///ENST00000342785///ENST00000343200	1462	VCAN|versican	chr5:83471464-83582303				0.00285004	1.0093	8.46816	0.21705	0.364086
ENSG00000038532	ENST00000409790///ENST00000409552///ENST00000494853///ENST00000463896///ENST00000476025///ENST00000465491///ENST00000487189///ENST00000463459///ENST00000428742///ENST00000436973///ENST00000261657///ENST00000459723	23274	CLEC16A|C-type lectin domain family 16, member A	chr16:10944487-11182189				13.1669	12.8825	-0.0314996	0.8609	0.91983
ENSG00000038945	ENST00000262101///ENST00000445506///ENST00000355282///ENST00000522672///ENST00000381998///ENST00000519060///ENST00000518960///ENST00000518026///ENST00000521876///ENST00000518343///ENST00000517522///ENST00000520846///ENST00000522130///ENST00000350896	4481	MSR1|macrophage scavenger receptor 1	chr8:16107877-16567490				0	0.0237413	18.6778	1	1
ENSG00000039068	ENST00000261769///ENST00000566612///ENST00000422392///ENST00000566510///ENST00000562836///ENST00000564676///ENST00000564745///ENST00000561751///ENST00000567320///ENST00000565810///ENST00000562118///ENST00000612417///ENST00000621016///ENST00000611625	999	CDH1|cadherin 1, type 1	chr16:68737224-68835548	GO:0005509|calcium ion binding|///GO:0016021|integral component of membrane|///GO:0005576|extracellular region|///GO:0005737|cytoplasm|///GO:0016020|membrane|///GO:0007264|small GTPase mediated signal transduction|///GO:0005886|plasma membrane|///GO:0007156|homophilic cell adhesion via plasma membrane adhesion molecules|///GO:0006915|apoptotic process|///GO:0007155|cell adhesion|///GO:0005768|end…			1428.62	737.74	-0.953436	0.0134	0.0382001
ENSG00000039123	ENST00000230640///ENST00000504388///ENST00000506750///ENST00000503165///ENST00000504997///ENST00000505565///ENST00000502953///ENST00000518955///ENST00000508716	23517	SKIV2L2|superkiller viralicidic activity 2-like 2 (S. cerevisiae)	chr5:55307759-55535050	GO:0005524|ATP binding|///GO:0003676|nucleic acid binding|///GO:0003723|RNA binding|///GO:0005634|nucleus|///GO:0005730|nucleolus|///GO:0005654|nucleoplasm|///GO:0000398|mRNA splicing, via spliceosome|///GO:0044822|poly(A) RNA binding|///GO:0005515|protein binding|///GO:0071013|catalytic step 2 spliceosome|///GO:0006401|RNA catabolic process|///GO:0003724|RNA helicase activity|///GO:0000460|matur…			83.5835	58.8233	-0.506829	0.01055	0.0311472
ENSG00000039139	ENST00000265104///ENST00000504001///ENST00000512443///ENST00000508040	1767	DNAH5|dynein, axonemal, heavy chain 5	chr5:13690330-13944543	GO:0005524|ATP binding|///GO:0008152|metabolic process|///GO:0003777|microtubule motor activity|///GO:0007018|microtubule-based movement|///GO:0016887|ATPase activity|///GO:0030286|dynein complex|///GO:0005874|microtubule|///GO:0042384|cilium assembly|///GO:0030317|sperm motility|///GO:0005575|cellular_component|///GO:0008150|biological_process|///GO:0003341|cilium movement|///GO:0005930|axoneme|…			0.305181	1.53615	2.33158	5e-05	0.00026084
ENSG00000039319	ENST00000338008///ENST00000510158///ENST00000505560///ENST00000512558///ENST00000509562///ENST00000510995///ENST00000512442///ENST00000511050///ENST00000511829///ENST00000509558///ENST00000507548///ENST00000512907///ENST00000513789	9765	ZFYVE16|zinc finger, FYVE domain containing 16	chr5:80408012-80479350				45.6095	33.0016	-0.466797	0.12315	0.237869
ENSG00000039523	ENST00000562116///ENST00000562755///ENST00000379312///ENST00000566522///ENST00000042381///ENST00000540839///ENST00000566907///ENST00000566920///ENST00000565176///ENST00000428437///ENST00000569253///ENST00000566559///ENST00000566815///ENST00000561534///ENST00000569474///ENST00000566730///ENST00000569179///ENST00000569733///ENST00000564616///ENST00000568959///ENST00000565190///ENST00000565679///ENS…	79567	FAM65A|family with sequence similarity 65, member A	chr16:67517861-67546788				20.5205	16.9922	-0.272193	0.3016	0.465327
ENSG00000039537	ENST00000337836///ENST00000263413///ENST00000461473///ENST00000511470///ENST00000475349///ENST00000473450///ENST00000417809///ENST00000433294	729	C6|complement component 6	chr5:41142233-41261438				0.0200639	0.0125077	-0.681788	1	1
ENSG00000039560	ENST00000265109///ENST00000514527///ENST00000510319///ENST00000514931///ENST00000513974///ENST00000512629///ENST00000428746///ENST00000514873///ENST00000508777///ENST00000503673///ENST00000511652///ENST00000504052///ENST00000512305///ENST00000514036///ENST00000515799///ENST00000510386///ENST00000508315///ENST00000515448///ENST00000503222///ENST00000512625///ENST00000505185///ENST00000506376///ENS…	26064	RAI14|retinoic acid induced 14	chr5:34656236-34832627	GO:0005634|nucleus|///GO:0005737|cytoplasm|///GO:0005654|nucleoplasm|///GO:0015629|actin cytoskeleton|///GO:0005938|cell cortex|///GO:0005515|protein binding|///GO:0005739|mitochondrion|			0.767355	4.45576	2.53771	5e-05	0.00026084
ENSG00000039600	ENST00000311371///ENST00000265007///ENST00000519442	11063	SOX30|SRY (sex determining region Y)-box 30	chr5:157625678-157671480				0.0198613	0.134683	2.76154	1	1
ENSG00000039650	ENST00000600910///ENST00000322344///ENST00000599454///ENST00000631020///ENST00000596014///ENST00000600573///ENST00000597965///ENST00000625216///ENST00000593706///ENST00000627317///ENST00000629179///ENST00000599543///ENST00000596726///ENST00000625299///ENST00000598020///ENST00000626274///ENST00000629088///ENST00000595792///ENST00000593946///ENST00000627232///ENST00000595081///ENST00000601816///ENS…	11284	PNKP|polynucleotide kinase 3'-phosphatase	chr19:49861203-49888749				26.845	21.3252	-0.332097	0.41265	0.585039
ENSG00000039987	ENST00000549706///ENST00000553030///ENST00000552539///ENST00000042931	54831	BEST2|bestrophin 2	chr19:12751701-12758458				0.0547346	0	-16.6898	1	1
ENSG00000040199	ENST00000568004///ENST00000564884///ENST00000568954///ENST00000393524///ENST00000567016///ENST00000538126///ENST00000574977	23035	PHLPP2|PH domain and leucine rich repeat protein phosphatase 2	chr16:71623707-71724701	GO:0008152|metabolic process|///GO:0003824|catalytic activity|///GO:0005515|protein binding|///GO:0046872|metal ion binding|///GO:0005634|nucleus|///GO:0005737|cytoplasm|///GO:0005829|cytosol|///GO:0045087|innate immune response|///GO:0008543|fibroblast growth factor receptor signaling pathway|///GO:0048015|phosphatidylinositol-mediated signaling|///GO:0038095|Fc-epsilon receptor signaling pathwa…			20.0154	9.29833	-1.10607	5e-05	0.00026084
ENSG00000040275	ENST00000265295///ENST00000506574///ENST00000515224///ENST00000507232///ENST00000510751///ENST00000508247///ENST00000503209///ENST00000513941///ENST00000509785///ENST00000512028///ENST00000513795///ENST00000508837///ENST00000503871///ENST00000505977///ENST00000523518///ENST00000629457	54908	SPDL1|spindle apparatus coiled-coil protein 1	chr5:169583633-169604778				45.0299	24.023	-0.906464	0.0002	0.000933714
ENSG00000040341	ENST00000522695///ENST00000524300///ENST00000522818///ENST00000523558///ENST00000521210///ENST00000523533///ENST00000355780///ENST00000519961///ENST00000521727///ENST00000521451///ENST00000522509///ENST00000517542///ENST00000518981///ENST00000518767///ENST00000518502///ENST00000521293///ENST00000521447///ENST00000524104///ENST00000522962///ENST00000521419///ENST00000524191///ENST00000524113///ENS…	27067	STAU2|staufen double-stranded RNA binding protein 2	chr8:73420003-73878910				78.4438	41.2449	-0.927445	0.0192	0.0517375
ENSG00000040487	ENST00000375155///ENST00000375153///ENST00000469076///ENST00000400548///ENST00000497827///ENST00000432465	54896	PQLC2|PQ loop repeat containing 2	chr1:19312325-19329300				4.07775	11.275	1.46728	5e-05	0.00026084
ENSG00000040531	ENST00000046640///ENST00000381870///ENST00000452111///ENST00000574776///ENST00000495445///ENST00000467663///ENST00000488623///ENST00000574218///ENST00000399306///ENST00000576979	1497	CTNS|cystinosin, lysosomal cystine transporter	chr17:3636467-3661542				7.97913	7.71827	-0.0479527	0.84205	0.909438
ENSG00000040608	ENST00000416372///ENST00000043402///ENST00000425986///ENST00000469601///ENST00000474642///ENST00000463936	65078	RTN4R|reticulon 4 receptor	chr22:20241414-20283246				0.143253	0.178666	0.318704	1	1
ENSG00000040633	ENST00000320316///ENST00000571362///ENST00000576955///ENST00000454255///ENST00000572789///ENST00000573826///ENST00000574323///ENST00000570899///ENST00000574236///ENST00000574407///ENST00000570753///ENST00000574899///ENST00000613632	79142	PHF23|PHD finger protein 23	chr17:7235027-7239722				22.5401	37.6199	0.739005	5e-05	0.00026084
ENSG00000040731	ENST00000264463///ENST00000502921///ENST00000510477///ENST00000503958	1008	CDH10|cadherin 10, type 2 (T2-cadherin)	chr5:24487099-24644978				0	0.0137379	18.6778	1	1
ENSG00000040933	ENST00000409016///ENST00000409851///ENST00000409463///ENST00000409540///ENST00000463367///ENST00000523221///ENST00000468638///ENST00000467042///ENST00000498026///ENST00000074304	3631	INPP4A|inositol polyphosphate-4-phosphatase type I A	chr2:98444853-98594390				5.41379	5.35405	-0.0160082	0.91995	0.951195
ENSG00000041353	ENST00000586570///ENST00000262094///ENST00000586594///ENST00000592334	5874	RAB27B|RAB27B, member RAS oncogene family	chr18:54717859-54898083	GO:0005525|GTP binding|///GO:0007264|small GTPase mediated signal transduction|///GO:0015031|protein transport|///GO:0003924|GTPase activity|///GO:0006886|intracellular protein transport|///GO:0032482|Rab protein signal transduction|///GO:0006904|vesicle docking involved in exocytosis|///GO:0005794|Golgi apparatus|///GO:0009306|protein secretion|///GO:0030141|secretory granule|///GO:0032402|melan…			10.9785	7.12088	-0.624549	0.0103	0.0304916
ENSG00000041357	ENST00000560217///ENST00000044462///ENST00000559082///ENST00000560033///ENST00000559948///ENST00000413382///ENST00000559146///ENST00000558639///ENST00000559934///ENST00000558635///ENST00000560099///ENST00000557929///ENST00000558281///ENST00000559365///ENST00000558341///ENST00000559437///ENST00000560842///ENST00000560737///ENST00000559906///ENST00000559154///ENST00000558094	5685	PSMA4|proteasome subunit alpha 4	chr15:78540404-78552419				536.098	303.947	-0.81868	5e-05	0.00026084
ENSG00000041515	ENST00000251041///ENST00000357550///ENST00000467639///ENST00000375857///ENST00000482793///ENST00000457511///ENST00000356711	23026	MYO16|myosin XVI	chr13:108596151-109208007				1.0092	0.675078	-0.580087	0.0044	0.0145256
ENSG00000041802	ENST00000265245///ENST00000475763///ENST00000460584///ENST00000437613///ENST00000466391///ENST00000461343///ENST00000427461///ENST00000480853	55341	LSG1|large 60S subunit nuclear export GTPase 1	chr3:194584010-194672477				62.8262	42.4449	-0.565776	0.002	0.00729827
ENSG00000041880	ENST00000417220///ENST00000398755///ENST00000471971///ENST00000470601///ENST00000470749///ENST00000498510///ENST00000475782///ENST00000486510///ENST00000431474	10039	PARP3|poly (ADP-ribose) polymerase family, member 3	chr3:51942344-51948867	GO:0003950|NAD+ ADP-ribosyltransferase activity|///GO:0006471|protein ADP-ribosylation|///GO:0005634|nucleus|///GO:0003824|catalytic activity|///GO:0006281|DNA repair|///GO:0006302|double-strand break repair|///GO:0005814|centriole|///GO:0000723|telomere maintenance|///GO:0035861|site of double-strand break|///GO:0051106|positive regulation of DNA ligation|///GO:0060236|regulation of mitotic spin…			0.549115	3.71431	2.75791	5e-05	0.00026084
ENSG00000041982	ENST00000350763///ENST00000341037///ENST00000423613///ENST00000537320///ENST00000542877///ENST00000544972///ENST00000460345///ENST00000498724///ENST00000476680///ENST00000473855///ENST00000635336///ENST00000481475///ENST00000534839///ENST00000535648	3371	TNC|tenascin C	chr9:115019577-115118257	GO:0005615|extracellular space|///GO:0005576|extracellular region|///GO:0016020|membrane|///GO:0007155|cell adhesion|///GO:0031012|extracellular matrix|///GO:0005515|protein binding|///GO:0005925|focal adhesion|///GO:0030198|extracellular matrix organization|///GO:0009611|response to wounding|///GO:0045545|syndecan binding|///GO:0001649|osteoblast differentiation|///GO:0005604|basement membrane|/…			0.10231	0.0427467	-1.25907	1	1
ENSG00000041988	ENST00000054650///ENST00000484676///ENST00000307896///ENST00000377627///ENST00000484669///ENST00000487819///ENST00000472925///ENST00000480647	90326	THAP3|THAP domain containing, apoptosis associated protein 3	chr1:6624865-6701924				4.13342	4.58674	0.150134	0.76985	0.86953
ENSG00000042062	ENST00000327979///ENST00000462842///ENST00000488529///ENST00000482129///ENST00000462493///ENST00000045083	140876	FAM65C|family with sequence similarity 65, member C	chr20:50586107-50691528				1.27457	0.816987	-0.641622	0.02335	0.0609222
ENSG00000042088	ENST00000554976///ENST00000393452///ENST00000554180///ENST00000393454///ENST00000553617///ENST00000335725///ENST00000555565///ENST00000556867///ENST00000553569///ENST00000553527///ENST00000553989///ENST00000545686///ENST00000555178///ENST00000556498///ENST00000555880///ENST00000557782///ENST00000556063	55775	TDP1|tyrosyl-DNA phosphodiesterase 1	chr14:89954938-90044768				29.426	19.1357	-0.620822	5e-05	0.00026084
ENSG00000042286	ENST00000373248///ENST00000307864///ENST00000482166///ENST00000613322	84883	AIFM2|apoptosis-inducing factor, mitochondrion-associated, 2	chr10:70052795-70132934	GO:0005615|extracellular space|///GO:0003677|DNA binding|///GO:0016021|integral component of membrane|///GO:0005739|mitochondrion|///GO:0005737|cytoplasm|///GO:0055114|oxidation-reduction process|///GO:0050660|flavin adenine dinucleotide binding|///GO:0016491|oxidoreductase activity|///GO:0005829|cytosol|///GO:0008137|NADH dehydrogenase (ubiquinone) activity|///GO:0043065|positive regulation of a…			4.45473	2.55768	-0.800502	0.00115	0.00451357
ENSG00000042304	ENST00000264387///ENST00000409066	56918	C2orf83|chromosome 2 open reading frame 83	chr2:227610089-227648606				0	0	0	1	1
ENSG00000042317	ENST00000556553///ENST00000393545///ENST00000554168///ENST00000556870///ENST00000555534///ENST00000557724///ENST00000555715///ENST00000555356///ENST00000554102///ENST00000555515///ENST00000555401///ENST00000553626///ENST00000553885///ENST00000557567///ENST00000557248///ENST00000553908///ENST00000045347///ENST00000556666///ENST00000556406///ENST00000553303///ENST00000554802///ENST00000356583	55812	SPATA7|spermatogenesis associated 7	chr14:88384923-88554733				4.42943	6.80887	0.620295	0.01095	0.0321781
ENSG00000042429	ENST00000251871///ENST00000530819///ENST00000533359///ENST00000533133///ENST00000528786///ENST00000525026///ENST00000533367///ENST00000507258///ENST00000531920///ENST00000525613///ENST00000529626	9440	MED17|mediator complex subunit 17	chr11:93661638-93814695				47.4504	35.6962	-0.410652	0.24915	0.403356
ENSG00000042445	ENST00000429806///ENST00000295802///ENST00000449375///ENST00000438611///ENST00000409984///ENST00000482694///ENST00000490291	54884	RETSAT|retinol saturase (all-trans-retinol 13,14-reductase)	chr2:85342087-85391752	GO:0016020|membrane|///GO:0055114|oxidation-reduction process|///GO:0016491|oxidoreductase activity|///GO:0042572|retinol metabolic process|///GO:0005789|endoplasmic reticulum membrane|///GO:0031965|nuclear membrane|///GO:0005640|nuclear outer membrane|///GO:0051786|all-trans-retinol 13,14-reductase activity|			9.6852	18.8745	0.962588	5e-05	0.00026084
ENSG00000042493	ENST00000263867///ENST00000453973///ENST00000409921///ENST00000409670///ENST00000409724///ENST00000471064///ENST00000483659///ENST00000439385///ENST00000449030///ENST00000447219///ENST00000459793///ENST00000409275///ENST00000415012///ENST00000491267///ENST00000479651	822	CAPG|capping protein (actin filament), gelsolin-like	chr2:85394747-85418432				22.8494	44.3759	0.957619	5e-05	0.00026084
ENSG00000042753	ENST00000352203///ENST00000601498///ENST00000599990///ENST00000593442///ENST00000263270///ENST00000600964///ENST00000597020///ENST00000598027///ENST00000601649///ENST00000597421	1175	AP2S1|adaptor-related protein complex 2, sigma 1 subunit	chr19:46838135-46850992				320.613	545.016	0.765464	5e-05	0.00026084
ENSG00000042781	ENST00000481786///ENST00000366942///ENST00000307340///ENST00000463147	7399	USH2A|Usher syndrome 2A (autosomal recessive, mild)	chr1:215622893-216423396				0.00554109	0.00452048	-0.293693	1	1
ENSG00000042813	ENST00000491129///ENST00000465922///ENST00000046087///ENST00000419417///ENST00000450231///ENST00000413331	11055	ZPBP|zona pellucida binding protein	chr7:49773660-50159830				0	0	0	1	1
ENSG00000042832	ENST00000523901///ENST00000220616///ENST00000520769///ENST00000523756///ENST00000518097///ENST00000518505///ENST00000519178///ENST00000518058///ENST00000519543///ENST00000520197///ENST00000520089///ENST00000519294///ENST00000524151///ENST00000522523///ENST00000522797///ENST00000518108///ENST00000522996///ENST00000522809///ENST00000521107///ENST00000522691	7038	TG|thyroglobulin	chr8:132866957-133134903	GO:0005576|extracellular region|///GO:0007165|signal transduction|///GO:0005179|hormone activity|///GO:0042446|hormone biosynthetic process|///GO:0030878|thyroid gland development|///GO:0005615|extracellular space|///GO:0015705|iodide transport|///GO:0042403|thyroid hormone metabolic process|///GO:0031641|regulation of myelination|///GO:0042803|protein homodimerization activity|///GO:0005794|Golg…			0.00589456	0.126065	4.41864	1	1
ENSG00000042980	ENST00000265769///ENST00000523379///ENST00000520448///ENST00000437154///ENST00000523440///ENST00000518516///ENST00000521110///ENST00000521629///ENST00000523236///ENST00000518326///ENST00000520665///ENST00000518737	10863	ADAM28|ADAM metallopeptidase domain 28	chr8:24294039-24912073				0.241959	0.0608258	-1.99201	1	1
ENSG00000043039	ENST00000281437///ENST00000605151	8538	BARX2|BARX homeobox 2	chr11:129375939-129452279				9.98511	1.02801	-3.27992	5e-05	0.00026084
ENSG00000043093	ENST00000292782///ENST00000469954///ENST00000492563///ENST00000497606///ENST00000460412///ENST00000487822///ENST00000466812///ENST00000632685	54165	DCUN1D1|DCN1, defective in cullin neddylation 1, domain containing 1	chr3:182938073-182985953				64.1817	35.8975	-0.838279	5e-05	0.00026084
ENSG00000043143	ENST00000512386///ENST00000282605///ENST00000515554///ENST00000361895///ENST00000402835///ENST00000395003///ENST00000431355///ENST00000453515///ENST00000470876///ENST00000430087///ENST00000612830	23338	JADE2|jade family PHD finger 2	chr5:134524311-134583230				16.0204	11.0552	-0.535181	0.02445	0.063221
ENSG00000043355	ENST00000376335///ENST00000490085///ENST00000468291///ENST00000477213///ENST00000481565///ENST00000620342	7546	ZIC2|Zic family member 2	chr13:99981771-99986773				5.01719	2.35568	-1.09073	5e-05	0.00026084
ENSG00000043462	ENST00000046794///ENST00000520322///ENST00000521416///ENST00000523369///ENST00000520344///ENST00000519594///ENST00000522760///ENST00000522823///ENST00000519149///ENST00000628092	3937	LCP2|lymphocyte cytosolic protein 2 (SH2 domain containing leukocyte protein of 76kDa)	chr5:170232446-170298227				0.0384355	0	-16.6898	1	1
ENSG00000043514	ENST00000441669///ENST00000462797///ENST00000316891///ENST00000372818///ENST00000495175///ENST00000491865///ENST00000465417///ENST00000492612///ENST00000467774///ENST00000489945///ENST00000486825///ENST00000469476///ENST00000462243///ENST00000541099///ENST00000537440	54802	TRIT1|tRNA isopentenyltransferase 1	chr1:39841021-39883511				17.7136	16.3225	-0.117996	0.52335	0.688312
ENSG00000043591	ENST00000369295	153	ADRB1|adrenoceptor beta 1	chr10:114044055-114046908				0.326786	1.51634	2.21418	5e-05	0.00026084
ENSG00000044012	ENST00000372581	2981	GUCA2B|guanylate cyclase activator 2B (uroguanylin)	chr1:42153420-42155824				0	0	0	1	1
ENSG00000044090	ENST00000265348///ENST00000478630///ENST00000535468	9820	CUL7|cullin 7	chr6:43037616-43075099				8.49966	14.2215	0.742601	5e-05	0.00026084
ENSG00000044115	ENST00000521368///ENST00000521387///ENST00000519489///ENST00000520520///ENST00000522792///ENST00000627109///ENST00000540387///ENST00000517533///ENST00000523685///ENST00000518263///ENST00000519768///ENST00000517656///ENST00000521683///ENST00000521640///ENST00000519116///ENST00000522052///ENST00000520522///ENST00000517904///ENST00000519634///ENST00000302763///ENST00000518910///ENST00000521941///ENS…	1495	CTNNA1|catenin (cadherin-associated protein), alpha 1, 102kDa	chr5:138610966-138935034				571.488	333.243	-0.778149	5e-05	0.00026084
ENSG00000044446	ENST00000379942///ENST00000481718///ENST00000469485///ENST00000473597///ENST00000473739///ENST00000469645///ENST00000486231///ENST00000464455	5256	PHKA2|phosphorylase kinase, alpha 2 (liver)	chrX:18890295-18984598				16.4761	10.1414	-0.700114	0.0408	0.0971796
ENSG00000044459	ENST00000484374///ENST00000380647///ENST00000380641///ENST00000461247	54875	CNTLN|centlein, centrosomal protein	chr9:17134981-17503923	GO:0005737|cytoplasm|///GO:0030674|protein binding, bridging|///GO:0023014|signal transduction by protein phosphorylation|///GO:0019901|protein kinase binding|///GO:0019904|protein domain specific binding|///GO:0005814|centriole|///GO:0070062|extracellular exosome|///GO:0000155|phosphorelay sensor kinase activity|///GO:0000160|phosphorelay signal transduction system|///GO:0033365|protein localiza…			0.783037	0.0960434	-3.02732	5e-05	0.00026084
ENSG00000044524	ENST00000336596///ENST00000452448///ENST00000494014	2042	EPHA3|EPH receptor A3	chr3:89107523-89482134				0.695306	0.12519	-2.47353	5e-05	0.00026084
ENSG00000044574	ENST00000324460	3309	HSPA5|heat shock 70kDa protein 5 (glucose-regulated protein, 78kDa)	chr9:125234852-125241330				195.586	167.726	-0.221697	0.0343	0.0841052
ENSG00000046604	ENST00000261590///ENST00000585206	1829	DSG2|desmoglein 2	chr18:31498042-31556911				22.3257	22.7385	0.0264269	0.81465	0.892341
ENSG00000046647	ENST00000380523///ENST00000398355///ENST00000332885///ENST00000460203///ENST00000477386	54960	GEMIN8|gem (nuclear organelle) associated protein 8	chrX:14008278-14029893				10.0725	16.2953	0.694034	5e-05	0.00026084
ENSG00000046651	ENST00000340096///ENST00000380567///ENST00000485052///ENST00000490265///ENST00000466534///ENST00000464463///ENST00000474705///ENST00000380550///ENST00000398395	8481	OFD1|oral-facial-digital syndrome 1	chrX:13734744-13769353				19.968	30.7041	0.620746	5e-05	0.00026084
ENSG00000046653	ENST00000316715///ENST00000454189///ENST00000493677///ENST00000472735///ENST00000355135///ENST00000356942///ENST00000398361///ENST00000495211///ENST00000493085///ENST00000468080///ENST00000475307	2824	GPM6B|glycoprotein M6B	chrX:13771030-13938638	GO:0007399|nervous system development|///GO:0016021|integral component of membrane|///GO:0015031|protein transport|///GO:0005886|plasma membrane|///GO:0030154|cell differentiation|///GO:0032956|regulation of actin cytoskeleton organization|///GO:0003674|molecular_function|///GO:0045121|membrane raft|///GO:0001503|ossification|///GO:0085029|extracellular matrix assembly|///GO:0030501|positive regu…			0.526897	0.799944	0.602376	0.03905	0.0936246
ENSG00000046774	ENST00000247452	51438	MAGEC2|melanoma antigen family C2	chrX:142202344-142205290				0.0299258	0.191596	2.67861	1	1
ENSG00000046889	ENST00000288368///ENST00000529398///ENST00000517617///ENST00000522247///ENST00000520235	80243	PREX2|phosphatidylinositol-3,4,5-trisphosphate-dependent Rac exchange factor 2	chr8:67952117-68237030	GO:0007186|G-protein coupled receptor signaling pathway|///GO:0005622|intracellular|///GO:0035556|intracellular signal transduction|///GO:0005096|GTPase activator activity|///GO:0043547|positive regulation of GTPase activity|///GO:0005089|Rho guanyl-nucleotide exchange factor activity|///GO:0035023|regulation of Rho protein signal transduction|///GO:0005085|guanyl-nucleotide exchange factor activ…			0.00785329	0.00096363	-3.02674	1	1
ENSG00000047056	ENST00000358220///ENST00000381329///ENST00000263150///ENST00000436154///ENST00000482165///ENST00000620998	22884	WDR37|WD repeat domain 37	chr10:1049537-1132297	GO:0005515|protein binding|			11.5003	10.0754	-0.190834	0.16985	0.303695
ENSG00000047188	ENST00000161863///ENST00000503857///ENST00000515883///ENST00000514720///ENST00000506333///ENST00000512600///ENST00000507567	64848	YTHDC2|YTH domain containing 2	chr5:113513682-113595285				14.8162	12.9206	-0.197508	0.35685	0.52689
ENSG00000047230	ENST00000359276///ENST00000380241///ENST00000483053///ENST00000455276///ENST00000443824	56474	CTPS2|CTP synthase 2	chrX:16588002-16712936				25.0898	30.7873	0.295235	0.1714	0.305603
ENSG00000047249	ENST00000355221///ENST00000518072///ENST00000522159///ENST00000523343///ENST00000520188///ENST00000359530///ENST00000523899///ENST00000396774///ENST00000524164///ENST00000523426///ENST00000521707///ENST00000521900///ENST00000522849///ENST00000521377///ENST00000519588///ENST00000521275///ENST00000524234///ENST00000521335///ENST00000519922///ENST00000630578	51606	ATP6V1H|ATPase, H+ transporting, lysosomal 50/57kDa, V1 subunit H	chr8:53715556-53843558				60.6475	79.312	0.387091	0.03745	0.0904289
ENSG00000047315	ENST00000450656///ENST00000381227///ENST00000495311///ENST00000431623///ENST00000441246///ENST00000433463///ENST00000497845///ENST00000478188///ENST00000510355///ENST00000464918///ENST00000484821///ENST00000314595	5431	POLR2B|polymerase (RNA) II (DNA directed) polypeptide B, 140kDa	chr4:56963369-57205510	GO:0003677|DNA binding|///GO:0006351|transcription, DNA-templated|///GO:0006366|transcription from RNA polymerase II promoter|///GO:0001055|RNA polymerase II activity|///GO:0032549|ribonucleoside binding|///GO:0003899|DNA-directed RNA polymerase activity|///GO:0046872|metal ion binding|///GO:0005634|nucleus|///GO:0006368|transcription elongation from RNA polymerase II promoter|///GO:0016020|membr…			114.856	113.686	-0.0147754	0.9535	0.970854
ENSG00000047346	ENST00000568871///ENST00000261844///ENST00000534964///ENST00000546305///ENST00000568637///ENST00000399202///ENST00000570204///ENST00000566948///ENST00000568668///ENST00000562135///ENST00000566768///ENST00000561490///ENST00000561543///ENST00000568863///ENST00000562351///ENST00000619572	56204	FAM214A|family with sequence similarity 214, member A	chr15:52577841-52709817	GO:0005515|protein binding|			30.1221	170.978	2.50492	5e-05	0.00026084
ENSG00000047365	ENST00000503225///ENST00000513032///ENST00000505837///ENST00000303965///ENST00000512804///ENST00000503904///ENST00000508066///ENST00000511416///ENST00000506189///ENST00000618163	116984	ARAP2|ArfGAP with RhoGAP domain, ankyrin repeat and PH domain 2	chr4:35948220-36274220				7.00173	4.34629	-0.687926	0.04975	0.114403
ENSG00000047410	ENST00000367478///ENST00000467810///ENST00000492973///ENST00000481347///ENST00000491783///ENST00000469463///ENST00000474852///ENST00000451586///ENST00000613151	7175	TPR|translocated promoter region, nuclear basket protein	chr1:186296278-186375693				75.7746	51.8289	-0.547957	0.0422	0.0999324
ENSG00000047457	ENST00000481169///ENST00000479771///ENST00000460674///ENST00000264613///ENST00000494544///ENST00000474204///ENST00000473296///ENST00000463556///ENST00000490639///ENST00000497902///ENST00000462336///ENST00000489736///ENST00000497797///ENST00000471356///ENST00000455472	1356	CP|ceruloplasmin (ferroxidase)	chr3:149129583-149222055	GO:0055114|oxidation-reduction process|///GO:0016491|oxidoreductase activity|///GO:0005507|copper ion binding|///GO:0005615|extracellular space|///GO:0005576|extracellular region|///GO:0055085|transmembrane transport|///GO:0006879|cellular iron ion homeostasis|///GO:0072562|blood microparticle|///GO:0070062|extracellular exosome|///GO:0051087|chaperone binding|///GO:0005765|lysosomal membrane|///…			7.05063	4.6602	-0.597361	0.0843	0.17591
ENSG00000047578	ENST00000566023///ENST00000261588///ENST00000568258///ENST00000565672///ENST00000618117///ENST00000564749///ENST00000567894///ENST00000573850///ENST00000562207///ENST00000568622	23247	KIAA0556|KIAA0556	chr16:27550132-27780369				15.123	20.0374	0.405949	0.13115	0.250074
ENSG00000047579	ENST00000344537///ENST00000462989///ENST00000510395///ENST00000515875///ENST00000513680///ENST00000509674///ENST00000338950///ENST00000506844///ENST00000514651///ENST00000511762///ENST00000622898///ENST00000355917	84062	DTNBP1|dystrobrevin binding protein 1	chr6:15522800-15663058				21.8835	22.1675	0.0186012	0.92	0.951196
ENSG00000047597	ENST00000378616	7504	XK|X-linked Kx blood group	chrX:37349274-38688920				1.33583	0.770041	-0.794725	0.4013	0.573419
ENSG00000047617	ENST00000536751///ENST00000356134///ENST00000541874///ENST00000545860///ENST00000542326///ENST00000538154///ENST00000540543///ENST00000544988///ENST00000541487///ENST00000327087///ENST00000612575///ENST00000546188	57101	ANO2|anoctamin 2, calcium activated chloride channel	chr12:5531868-5946232				0.0160171	0.115683	2.8525	1	1
ENSG00000047621	ENST00000261250///ENST00000545746///ENST00000544258///ENST00000509318///ENST00000541014///ENST00000544697///ENST00000535887///ENST00000542080///ENST00000535030	57102	C12orf4|chromosome 12 open reading frame 4	chr12:4487727-4538508				8.60619	3.66443	-1.23179	5e-05	0.00026084
ENSG00000047634	ENST00000380045///ENST00000380041///ENST00000380043///ENST00000427362///ENST00000419185///ENST00000487842///ENST00000398080	6322	SCML1|sex comb on midleg-like 1 (Drosophila)	chrX:17737448-17754988	GO:0003677|DNA binding|///GO:0005634|nucleus|///GO:0006355|regulation of transcription, DNA-templated|///GO:0003700|transcription factor activity, sequence-specific DNA binding|///GO:0006351|transcription, DNA-templated|///GO:0009653|anatomical structure morphogenesis|///GO:0005515|protein binding|			1.71473	8.32089	2.27875	5e-05	0.00026084
ENSG00000047644	ENST00000380861///ENST00000466248///ENST00000454666	55841	WWC3|WWC family member 3	chrX:10015561-10144478	GO:0005829|cytosol|///GO:0032947|protein complex scaffold|///GO:0000122|negative regulation of transcription from RNA polymerase II promoter|///GO:0005515|protein binding|///GO:0035331|negative regulation of hippo signaling|///GO:0019900|kinase binding|///GO:0046621|negative regulation of organ growth|			7.70997	11.9104	0.627426	0.0004	0.00175048
ENSG00000047648	ENST00000380736///ENST00000303025///ENST00000337414///ENST00000495242///ENST00000489330///ENST00000380717///ENST00000380718///ENST00000491514	395	ARHGAP6|Rho GTPase activating protein 6	chrX:11137542-11665701				0.01528	0.0211144	0.46659	1	1
ENSG00000047662	ENST00000265018	27146	FAM184B|family with sequence similarity 184, member B	chr4:17614630-17781512				0.989425	1.06036	0.099887	0.78505	0.877914
ENSG00000047849	ENST00000429422///ENST00000395734///ENST00000426837///ENST00000360240///ENST00000420772///ENST00000335271///ENST00000477765///ENST00000383736///ENST00000462206///ENST00000497735///ENST00000482752///ENST00000423088///ENST00000633710///ENST00000434267///ENST00000439356///ENST00000468075	4134	MAP4|microtubule-associated protein 4	chr3:47850689-48089272	GO:0005737|cytoplasm|///GO:0005874|microtubule|///GO:0008017|microtubule binding|///GO:0015631|tubulin binding|///GO:0051301|cell division|///GO:0005198|structural molecule activity|///GO:0005886|plasma membrane|///GO:0043005|neuron projection|///GO:0015630|microtubule cytoskeleton|///GO:0044822|poly(A) RNA binding|///GO:0007052|mitotic spindle organization|///GO:0005515|protein binding|///GO:000…			77.8981	54.4577	-0.516452	0.01995	0.0534067
ENSG00000047932	ENST00000368498///ENST00000052569///ENST00000535237	57120	GOPC|golgi-associated PDZ and coiled-coil motif containing	chr6:117288299-117602542				17.5351	18.1891	0.0528272	0.68485	0.814519
ENSG00000047936	ENST00000368508///ENST00000368507///ENST00000403284	6098	ROS1|ROS proto-oncogene 1 , receptor tyrosine kinase	chr6:117288299-117602542	GO:0004672|protein kinase activity|///GO:0005524|ATP binding|///GO:0006468|protein phosphorylation|///GO:0016021|integral component of membrane|///GO:0016020|membrane|///GO:0005886|plasma membrane|///GO:0004714|transmembrane receptor protein tyrosine kinase activity|///GO:0030154|cell differentiation|///GO:0007169|transmembrane receptor protein tyrosine kinase signaling pathway|///GO:0016049|cell…			0	0.00130063	18.6778	1	1
ENSG00000048028	ENST00000003302///ENST00000544967///ENST00000545540///ENST00000544272///ENST00000540438///ENST00000538224///ENST00000538475///ENST00000537706///ENST00000545608///ENST00000535607///ENST00000537490///ENST00000537642///ENST00000542033///ENST00000540925///ENST00000544750	57646	USP28|ubiquitin specific peptidase 28	chr11:113797873-113875570				16.2814	8.56264	-0.927096	5e-05	0.00026084
ENSG00000048052	ENST00000417496///ENST00000455069///ENST00000425071///ENST00000433709///ENST00000411993///ENST00000413509///ENST00000461159///ENST00000474742///ENST00000413380///ENST00000430454///ENST00000476135///ENST00000405010///ENST00000406451///ENST00000428307///ENST00000461409///ENST00000406072///ENST00000446646///ENST00000401921///ENST00000523867///ENST00000432645///ENST00000441542///ENST00000441986///ENS…	9734	HDAC9|histone deacetylase 9	chr7:18086948-19002416	GO:0046872|metal ion binding|///GO:0005634|nucleus|///GO:0006351|transcription, DNA-templated|///GO:0005737|cytoplasm|///GO:0005667|transcription factor complex|///GO:0006954|inflammatory response|///GO:0008134|transcription factor binding|///GO:0000122|negative regulation of transcription from RNA polymerase II promoter|///GO:0045892|negative regulation of transcription, DNA-templated|///GO:0005…			0.20109	0.257331	0.355779	1	1
ENSG00000048140	ENST00000310032///ENST00000298564///ENST00000514705///ENST00000503030///ENST00000508164///ENST00000504168///ENST00000503045///ENST00000515708///ENST00000507471	26262	TSPAN17|tetraspanin 17	chr5:176647386-176659054				25.6524	30.032	0.227406	0.1508	0.278535
ENSG00000048162	ENST00000621444///ENST00000614830///ENST00000616685///ENST00000502663///ENST00000503849///ENST00000504821///ENST00000509257///ENST00000502577///ENST00000510608///ENST00000618911///ENST00000613081///ENST00000619979	51491	NOP16|NOP16 nucleolar protein	chr5:176365467-176416569				50.7534	70.442	0.472931	0.0587	0.131324
ENSG00000048342	ENST00000511544///ENST00000512702///ENST00000513811///ENST00000507954///ENST00000515124///ENST00000514450///ENST00000503292///ENST00000503658///ENST00000634028///ENST00000389652///ENST00000510220///ENST00000506643///ENST00000512202///ENST00000514039///ENST00000513035///ENST00000424120///ENST00000438599	57545	CC2D2A|coiled-coil and C2 domain containing 2A	chr4:15469864-15601557				4.31943	5.62198	0.380237	0.1384	0.260558
ENSG00000048392	ENST00000251810///ENST00000522368///ENST00000395910///ENST00000519962///ENST00000519317///ENST00000395912///ENST00000522394///ENST00000519125///ENST00000523957///ENST00000517517///ENST00000621845	50484	RRM2B|ribonucleotide reductase M2 B (TP53 inducible)	chr8:102204501-102239118				133.895	123.213	-0.119944	0.82095	0.895914
ENSG00000048405	ENST00000485577///ENST00000393313///ENST00000265827///ENST00000393312///ENST00000434602///ENST00000436992///ENST00000439506///ENST00000619291	168850	ZNF800|zinc finger protein 800	chr7:127346789-127431924	GO:0003677|DNA binding|///GO:0046872|metal ion binding|///GO:0005634|nucleus|///GO:0006355|regulation of transcription, DNA-templated|///GO:0006351|transcription, DNA-templated|			14.7532	16.9932	0.203936	0.14915	0.276345
ENSG00000048462	ENST00000053243///ENST00000396495///ENST00000562385	608	TNFRSF17|tumor necrosis factor receptor superfamily, member 17	chr16:11927372-11976643	GO:0016021|integral component of membrane|///GO:0007165|signal transduction|///GO:0005886|plasma membrane|///GO:0002250|adaptive immune response|///GO:0004872|receptor activity|///GO:0007275|multicellular organismal development|///GO:0012505|endomembrane system|///GO:0008283|cell proliferation|///GO:0033209|tumor necrosis factor-mediated signaling pathway|///GO:0002260|lymphocyte homeostasis|			0	0.0330307	18.6778	1	1
ENSG00000048471	ENST00000569801///ENST00000566228///ENST00000564111///ENST00000568949///ENST00000568359///ENST00000563308///ENST00000564791///ENST00000562510	92017	SNX29|sorting nexin 29	chr16:11976736-12611044				3.88863	4.68606	0.269114	0.071	0.153204
ENSG00000048540	ENST00000441439///ENST00000447609///ENST00000320122///ENST00000396205///ENST00000453727///ENST00000540848///ENST00000541589///ENST00000535535///ENST00000537304///ENST00000541764///ENST00000534946///ENST00000424192///ENST00000540445///ENST00000541846///ENST00000536172///ENST00000544754///ENST00000539534///ENST00000546281///ENST00000537757///ENST00000539232///ENST00000546279///ENST00000538051///ENS…	55885	LMO3|LIM domain only 3 (rhombotin-like 2)	chr12:16347141-16610594				0.214118	0.29069	0.441076	0.3133	0.478454
ENSG00000048544	ENST00000053468	55173	MRPS10|mitochondrial ribosomal protein S10	chr6:42206800-42217865	GO:0005840|ribosome|///GO:0005739|mitochondrion|///GO:0005743|mitochondrial inner membrane|///GO:0006996|organelle organization|///GO:0003674|molecular_function|///GO:0008150|biological_process|///GO:0032543|mitochondrial translation|///GO:0070125|mitochondrial translational elongation|///GO:0098779|mitophagy in response to mitochondrial depolarization|///GO:0002230|positive regulation of defense…			46.3372	39.0883	-0.245431	0.03105	0.077363
ENSG00000048545	ENST00000418175///ENST00000053469///ENST00000394237///ENST00000372958///ENST00000541991	2978	GUCA1A|guanylate cyclase activator 1A (retina)	chr6:42155405-42180056				0	0	0	1	1
ENSG00000048649	ENST00000308488///ENST00000480887///ENST00000529470///ENST00000531026///ENST00000526324///ENST00000531768///ENST00000532556///ENST00000528095///ENST00000534794///ENST00000440064///ENST00000467567///ENST00000530604	51773	RSF1|remodeling and spacing factor 1	chr11:77659995-77821017				50.5946	25.1556	-1.0081	0.0002	0.000933714
ENSG00000048707	ENST00000620676///ENST00000613099///ENST00000476169///ENST00000489961///ENST00000011700///ENST00000460333///ENST00000487188///ENST00000469054///ENST00000543710///ENST00000466732///ENST00000476045///ENST00000481484///ENST00000543766///ENST00000473099	55187	VPS13D|vacuolar protein sorting 13 homolog D (S. cerevisiae)	chr1:12230066-12512047				10.5275	21.557	1.034	0.0254	0.0653162
ENSG00000048740	ENST00000416382///ENST00000631460///ENST00000633200///ENST00000631816///ENST00000633077///ENST00000632065///ENST00000632728///ENST00000399850///ENST00000417956///ENST00000608830///ENST00000609870///ENST00000609692///ENST00000354897///ENST00000542579	10659	CELF2|CUGBP, Elav-like family member 2	chr10:11005320-11336675	GO:0000166|nucleotide binding|///GO:0003676|nucleic acid binding|///GO:0006397|mRNA processing|///GO:0003723|RNA binding|///GO:0005634|nucleus|///GO:0005737|cytoplasm|///GO:0006396|RNA processing|///GO:0044822|poly(A) RNA binding|///GO:0008016|regulation of heart contraction|///GO:0006376|mRNA splice site selection|			0.00760153	0.0145773	0.939362	1	1
ENSG00000048828	ENST00000277165///ENST00000375389///ENST00000446420///ENST00000475933///ENST00000427765	23196	FAM120A|family with sequence similarity 120A	chr9:93446493-93566107				99.7483	49.6786	-1.00567	5e-05	0.00026084
ENSG00000048991	ENST00000483021///ENST00000463230///ENST00000409478///ENST00000264160///ENST00000438014///ENST00000488035///ENST00000410054///ENST00000436436///ENST00000409606///ENST00000456040///ENST00000480793///ENST00000486532///ENST00000443537///ENST00000441871///ENST00000429703///ENST00000425804///ENST00000487294///ENST00000445855///ENST00000483065///ENST00000628915	23518	R3HDM1|R3H domain containing 1	chr2:135531454-135725270				64.1162	30.6343	-1.06554	0.00035	0.00155594
ENSG00000049089	ENST00000372748///ENST00000482722///ENST00000466267///ENST00000427563///ENST00000488463///ENST00000417105///ENST00000496215///ENST00000372736///ENST00000461118///ENST00000490132///ENST00000495948	1298	COL9A2|collagen, type IX, alpha 2	chr1:40300486-40317816				1.02965	1.10805	0.10587	0.66445	0.800979
ENSG00000049130	ENST00000378535///ENST00000228280///ENST00000347404///ENST00000357116///ENST00000552044///ENST00000613305	4254	KITLG|KIT ligand	chr12:88492792-88598218				23.9252	9.38838	-1.34958	5e-05	0.00026084
ENSG00000049167	ENST00000381118///ENST00000265038///ENST00000462279///ENST00000495985///ENST00000484330///ENST00000439176///ENST00000497892///ENST00000477893	1161	ERCC8|excision repair cross-complementation group 8	chr5:60873830-60945073				12.3655	6.62862	-0.899542	0.00035	0.00155594
ENSG00000049192	ENST00000381055///ENST00000381052///ENST00000314351///ENST00000417396///ENST00000470597///ENST00000464680///ENST00000504282///ENST00000502886	11174	ADAMTS6|ADAM metallopeptidase with thrombospondin type 1 motif, 6	chr5:65148735-65481920				0.0986467	0.14307	0.536378	1	1
ENSG00000049239	ENST00000377403///ENST00000602477///ENST00000495451	9563	H6PD|hexose-6-phosphate dehydrogenase (glucose 1-dehydrogenase)	chr1:9234774-9271337				5.57946	4.73847	-0.235705	0.1563	0.286164
ENSG00000049245	ENST00000054666///ENST00000470357///ENST00000487194	9341	VAMP3|vesicle-associated membrane protein 3	chr1:7771268-7781432				84.555	80.2034	-0.0762268	0.80475	0.888761
ENSG00000049246	ENST00000377541///ENST00000377532///ENST00000361923///ENST00000473653///ENST00000602883///ENST00000463106///ENST00000494684///ENST00000613533///ENST00000614998	8863	PER3|period circadian clock 3	chr1:7784319-7853512				13.6386	4.06176	-1.74752	5e-05	0.00026084
ENSG00000049247	ENST00000377516///ENST00000361696///ENST00000054668	10911	UTS2|urotensin 2	chr1:7784319-7853512				5.56185	2.22308	-1.32301	0.0002	0.000933714
ENSG00000049249	ENST00000474475///ENST00000492571///ENST00000615230///ENST00000377507	3604	TNFRSF9|tumor necrosis factor receptor superfamily, member 9	chr1:7915893-7943165				0.00735096	0.0777263	3.4024	1	1
ENSG00000049283	ENST00000268933///ENST00000503246///ENST00000503690///ENST00000514874///ENST00000510462///ENST00000515028///ENST00000571402///ENST00000507998///ENST00000512291///ENST00000512379///ENST00000510045///ENST00000504857///ENST00000507709///ENST00000511414///ENST00000515126///ENST00000507467///ENST00000574464///ENST00000537145	55040	EPN3|epsin 3	chr17:50532542-50555852				7.81363	8.54829	0.129642	0.6472	0.787972
ENSG00000049323	ENST00000404816///ENST00000432635///ENST00000402934///ENST00000404525///ENST00000407925///ENST00000413303///ENST00000468091///ENST00000415140///ENST00000498013///ENST00000422669///ENST00000489740///ENST00000418533	4052	LTBP1|latent transforming growth factor beta binding protein 1	chr2:32946971-33399509				12.5345	7.68229	-0.706293	0.0003	0.00135017
ENSG00000049449	ENST00000530348///ENST00000532942///ENST00000506388///ENST00000530146///ENST00000054950///ENST00000532721///ENST00000533898///ENST00000532474///ENST00000527337///ENST00000531345///ENST00000528630	5954///440034	RCN1|reticulocalbin 1, EF-hand calcium binding domain///RCN1|uncharacterized LOC440034	chr11:31784791-32105755				6.85888	26.2477	1.93614	5e-05	0.00026084
ENSG00000049540	ENST00000445912///ENST00000252034///ENST00000431562///ENST00000320492///ENST00000438906///ENST00000494160///ENST00000492003///ENST00000468517///ENST00000438880///ENST00000414324///ENST00000380562///ENST00000480728///ENST00000380575///ENST00000380584///ENST00000458204///ENST00000357036///ENST00000462506///ENST00000479432///ENST00000417091///ENST00000429192///ENST00000416107///ENST00000442310///ENS…	2006	ELN|elastin	chr7:74027788-74069907				0	0.0278399	18.6778	1	1
ENSG00000049541	ENST00000352131///ENST00000055077///ENST00000485545///ENST00000497430///ENST00000470266///ENST00000494019///ENST00000480432///ENST00000479105///ENST00000491206///ENST00000493156///ENST00000463194///ENST00000473493///ENST00000621097	5982	RFC2|replication factor C (activator 1) 2, 40kDa	chr7:74231498-74254458				102.18	53.7664	-0.926333	5e-05	0.00026084
ENSG00000049618	ENST00000346085///ENST00000350026///ENST00000414678///ENST00000494260///ENST00000319584///ENST00000452544///ENST00000493658///ENST00000478761///ENST00000400790	57492	ARID1B|AT rich interactive domain 1B (SWI1-like)	chr6:156776359-157210779				5.68643	4.86596	-0.2248	0.1117	0.220481
ENSG00000049656	ENST00000320895///ENST00000507807///ENST00000503042///ENST00000503534///ENST00000515719///ENST00000506641///ENST00000511268///ENST00000512451///ENST00000507195///ENST00000505914///ENST00000505605///ENST00000503151///ENST00000508765///ENST00000513250///ENST00000511786///ENST00000630539	81037	CLPTM1L|CLPTM1-like	chr5:1317743-1345099				132.838	117.631	-0.175407	0.2274	0.376844
ENSG00000049759	ENST00000356462///ENST00000400345///ENST00000589054///ENST00000617539///ENST00000382850///ENST00000256830///ENST00000590694///ENST00000591989///ENST00000591579///ENST00000592846///ENST00000585363///ENST00000588516///ENST00000585594///ENST00000587547///ENST00000435432///ENST00000357895///ENST00000586263///ENST00000456173///ENST00000588494///ENST00000588066///ENST00000431212///ENST00000586268///ENS…	23327	NEDD4L|neural precursor cell expressed, developmentally down-regulated 4-like, E3 ubiquitin protein ligase	chr18:58044366-58401540	GO:0042787|protein ubiquitination involved in ubiquitin-dependent protein catabolic process|///GO:0004842|ubiquitin-protein transferase activity|///GO:0055085|transmembrane transport|///GO:0006351|transcription, DNA-templated|///GO:0034765|regulation of ion transmembrane transport|///GO:0005622|intracellular|///GO:0043161|proteasome-mediated ubiquitin-dependent protein catabolic process|///GO:000…			46.8236	12.9716	-1.85188	5e-05	0.00026084
ENSG00000049768	ENST00000376207///ENST00000557224///ENST00000518685///ENST00000376197///ENST00000376199///ENST00000455775	50943	FOXP3|forkhead box P3	chrX:49235466-49264826				0.171725	0.434102	1.33793	0.06785	0.14782
ENSG00000049769	ENST00000466508///ENST00000055335///ENST00000495799///ENST00000471261///ENST00000376188	89801	PPP1R3F|protein phosphatase 1, regulatory subunit 3F	chrX:49269842-49301461				1.47745	3.33748	1.17565	0.0196	0.0526348
ENSG00000049860	ENST00000511181///ENST00000261416///ENST00000513079///ENST00000515528///ENST00000510820///ENST00000504459///ENST00000513336///ENST00000511621///ENST00000503312///ENST00000513539///ENST00000509579///ENST00000505859///ENST00000513867	3074	HEXB|hexosaminidase B (beta polypeptide)	chr5:74627405-74867854				235.028	239.533	0.0273905	0.90225	0.942572
ENSG00000049883	ENST00000380639///ENST00000515198///ENST00000511752///ENST00000486995///ENST00000308077///ENST00000503868///ENST00000510676///ENST00000503315///ENST00000493283///ENST00000460837///ENST00000536805///ENST00000543322	79810	PTCD2|pentatricopeptide repeat domain 2	chr5:72219408-72368395				7.9703	9.21256	0.208968	0.53435	0.697871
ENSG00000050030	ENST00000055682///ENST00000424929///ENST00000616200	340533	KIAA2022|KIAA2022	chrX:74732848-74925485				0.333796	0.0766321	-2.12295	0.00015	0.000719971
ENSG00000050130	ENST00000261247///ENST00000554754///ENST00000557560///ENST00000425728///ENST00000553156///ENST00000555491///ENST00000556985///ENST00000554271///ENST00000554795///ENST00000553941///ENST00000602482///ENST00000554721///ENST00000553647///ENST00000356057///ENST00000616435	51528	JKAMP|JNK1/MAPK8-associated membrane protein	chr14:59429021-59576831	GO:0016021|integral component of membrane|///GO:0031625|ubiquitin protein ligase binding|///GO:0005789|endoplasmic reticulum membrane|///GO:0030433|ER-associated ubiquitin-dependent protein catabolic process|///GO:0006986|response to unfolded protein|			54.4198	54.8693	0.0118682	0.92985	0.956595
ENSG00000050165	ENST00000527132///ENST00000396505///ENST00000326932///ENST00000525493///ENST00000528188///ENST00000532372///ENST00000525927///ENST00000532873///ENST00000533813///ENST00000534511///ENST00000529338///ENST00000526218///ENST00000531309///ENST00000530694///ENST00000534479///ENST00000533900	27122	DKK3|dickkopf WNT signaling pathway inhibitor 3	chr11:11963105-12009769				0.0125889	0.00660134	-0.931322	1	1
ENSG00000050327	ENST00000498580///ENST00000056217///ENST00000474817///ENST00000471847	7984///102725117	ARHGEF5|Rho guanine nucleotide exchange factor (GEF) 5///ARHGEF5|rho guanine nucleotide exchange factor 5-like	chr7:144186082-144380632				3.22295	4.04709	0.328502	0.1236	0.23855
ENSG00000050344	ENST00000056233///ENST00000607375///ENST00000606261	9603	NFE2L3|nuclear factor, erythroid 2-like 3	chr7:26152239-26187125				23.3538	19.7553	-0.241422	0.48315	0.65197
ENSG00000050393	ENST00000379170///ENST00000607303///ENST00000488770	63933	MCUR1|mitochondrial calcium uniporter regulator 1	chr6:13786556-13814568				46.2235	51.8556	0.165872	0.35835	0.528667
ENSG00000050405	ENST00000552491///ENST00000547825///ENST00000552823///ENST00000394943///ENST00000341247///ENST00000552783///ENST00000552909///ENST00000552720///ENST00000549064///ENST00000552338///ENST00000552008///ENST00000552045///ENST00000551486///ENST00000550611///ENST00000551691///ENST00000550592	51474	LIMA1|LIM domain and actin binding 1	chr12:50175787-50283546				18.6014	24.0795	0.372393	0.06315	0.139484
ENSG00000050426	ENST00000551477///ENST00000547318///ENST00000552430///ENST00000553175///ENST00000550755///ENST00000550446///ENST00000550929///ENST00000262055///ENST00000547029///ENST00000550442///ENST00000549340///ENST00000548390///ENST00000546992///ENST00000551261///ENST00000548209///ENST00000548251///ENST00000550715///ENST00000550814///ENST00000547660///ENST00000547555///ENST00000548401///ENST00000549686///ENS…	25875	LETMD1|LETM1 domain containing 1	chr12:51047961-51060424				47.3784	56.2155	0.246738	0.1478	0.27457
ENSG00000050438	ENST00000535225///ENST00000615370///ENST00000547697///ENST00000604314///ENST00000548352///ENST00000453097///ENST00000548811///ENST00000546497///ENST00000319957///ENST00000514353///ENST00000551071///ENST00000552001///ENST00000550211///ENST00000546663///ENST00000548616///ENST00000546872///ENST00000546875///ENST00000358657	9498	SLC4A8|solute carrier family 4, sodium bicarbonate cotransporter, member 8	chr12:51351246-51515763				5.04269	3.04988	-0.72544	0.0938	0.19176
ENSG00000050555	ENST00000361069///ENST00000480883///ENST00000355452///ENST00000462567	10319	LAMC3|laminin, gamma 3	chr9:131009081-131094473	GO:0005576|extracellular region|///GO:0016020|membrane|///GO:0005198|structural molecule activity|///GO:0005578|proteinaceous extracellular matrix|///GO:0007155|cell adhesion|///GO:0005515|protein binding|///GO:0005604|basement membrane|///GO:0030198|extracellular matrix organization|///GO:0007601|visual perception|///GO:0060041|retina development in camera-type eye|///GO:0000904|cell morphogenes…			0	0.0320963	18.6778	1	1
ENSG00000050628	ENST00000370931///ENST00000628037///ENST00000497146///ENST00000479353///ENST00000361210///ENST00000460330///ENST00000356595///ENST00000306666///ENST00000370924///ENST00000370932///ENST00000354608///ENST00000351052	5733	PTGER3|prostaglandin E receptor 3 (subtype EP3)	chr1:70852352-71047808				0.143613	0.887362	2.62734	5e-05	0.00026084
ENSG00000050730	ENST00000057513///ENST00000507879///ENST00000509841///ENST00000511909///ENST00000515605///ENST00000515036///ENST00000506753	79931	TNIP3|TNFAIP3 interacting protein 3	chr4:121131407-121227466				0	0	0	1	1
ENSG00000050748	ENST00000452135///ENST00000393360///ENST00000455781///ENST00000343111///ENST00000347470///ENST00000520212///ENST00000393362///ENST00000524170///ENST00000425491///ENST00000523135///ENST00000523583///ENST00000539014///ENST00000397072	5601	MAPK9|mitogen-activated protein kinase 9	chr5:180233142-180292099				94.3282	40.533	-1.21859	5e-05	0.00026084
ENSG00000050767	ENST00000390654///ENST00000484750///ENST00000407622	91522	COL23A1|collagen, type XXIII, alpha 1	chr5:178237617-178590555	GO:0016021|integral component of membrane|///GO:0005886|plasma membrane|///GO:0005581|collagen trimer|///GO:0005515|protein binding|///GO:0022617|extracellular matrix disassembly|///GO:0030198|extracellular matrix organization|///GO:0030574|collagen catabolic process|///GO:0005788|endoplasmic reticulum lumen|			0.0478721	0.231607	2.27443	1	1
ENSG00000050820	ENST00000393422///ENST00000162330///ENST00000562556///ENST00000563038///ENST00000566982///ENST00000535626///ENST00000538440///ENST00000418647///ENST00000542031///ENST00000420641///ENST00000393420///ENST00000569340///ENST00000564170///ENST00000568864///ENST00000564028///ENST00000566465///ENST00000569006///ENST00000561970///ENST00000563323///ENST00000567215///ENST00000563700///ENST00000546196	9564	BCAR1|breast cancer anti-estrogen resistance 1	chr16:75226073-75268053				6.71262	7.05039	0.0708263	0.7706	0.869726
ENSG00000051009	ENST00000449352///ENST00000529360///ENST00000265978///ENST00000524416///ENST00000532797	84067	FAM160A2|family with sequence similarity 160, member A2	chr11:6211334-6234711	GO:0015031|protein transport|///GO:0005515|protein binding|///GO:0008333|endosome to lysosome transport|///GO:0007040|lysosome organization|///GO:0007032|endosome organization|///GO:0045022|early endosome to late endosome transport|///GO:0070695|FHF complex|			7.79164	6.77366	-0.201992	0.20605	0.350576
ENSG00000051108	ENST00000439977///ENST00000562914///ENST00000568676///ENST00000569569///ENST00000565966///ENST00000344114///ENST00000300302///ENST00000570273///ENST00000379792///ENST00000569429///ENST00000563343///ENST00000566550///ENST00000563781///ENST00000568358///ENST00000564678///ENST00000563911///ENST00000567944///ENST00000568651///ENST00000568814	9709	HERPUD1|homocysteine-inducible, endoplasmic reticulum stress-inducible, ubiquitin-like domain member 1	chr16:56932047-56944863				77.1115	89.3217	0.212066	0.22555	0.374727
ENSG00000051128	ENST00000221222///ENST00000539827///ENST00000392351///ENST00000594794///ENST00000594439///ENST00000542541///ENST00000595756///ENST00000596482///ENST00000600077///ENST00000599808///ENST00000599097///ENST00000433218	9454	HOMER3|homer scaffolding protein 3	chr19:18899513-18946831				23.5031	11.8829	-0.983956	0.0032	0.0110044
ENSG00000051180	ENST00000527860///ENST00000423169///ENST00000267868///ENST00000557850///ENST00000532743///ENST00000382643///ENST00000525066///ENST00000526763///ENST00000531277///ENST00000533741	5888	RAD51|RAD51 recombinase	chr15:40686723-40732339	GO:0005524|ATP binding|///GO:0003677|DNA binding|///GO:0000166|nucleotide binding|///GO:0005737|cytoplasm|///GO:0005730|nucleolus|///GO:0006281|DNA repair|///GO:0008094|DNA-dependent ATPase activity|///GO:0005634|nucleus|///GO:0005739|mitochondrion|///GO:0051260|protein homooligomerization|///GO:0005815|microtubule organizing center|///GO:0008022|protein C-terminus binding|///GO:0003690|double-st…			42.6773	20.5058	-1.05743	5e-05	0.00026084
ENSG00000051341	ENST00000264233///ENST00000474243///ENST00000488282///ENST00000621776	10721	POLQ|polymerase (DNA directed), theta	chr3:121431426-121546641				13.6414	8.54142	-0.675447	0.0225	0.0591763
ENSG00000051382	ENST00000477593///ENST00000469284///ENST00000462898///ENST00000481749///ENST00000493568///ENST00000487552///ENST00000473435///ENST00000485060///ENST00000462294///ENST00000483968///ENST00000461451///ENST00000465581///ENST00000289153///ENST00000544716	5291	PIK3CB|phosphatidylinositol-4,5-bisphosphate 3-kinase, catalytic subunit beta	chr3:138652698-138834938				59.9277	26.0369	-1.20267	5e-05	0.00026084
ENSG00000051523	ENST00000261623///ENST00000565588///ENST00000566534///ENST00000566229///ENST00000567174///ENST00000569359///ENST00000563526///ENST00000568278///ENST00000562209///ENST00000561972	1535	CYBA|cytochrome b-245, alpha polypeptide	chr16:88643282-88651152	GO:0046872|metal ion binding|///GO:0016020|membrane|///GO:0007264|small GTPase mediated signal transduction|///GO:0046982|protein heterodimerization activity|///GO:0020037|heme binding|///GO:0055114|oxidation-reduction process|///GO:0006954|inflammatory response|///GO:0005886|plasma membrane|///GO:0009055|electron carrier activity|///GO:0045087|innate immune response|///GO:0002474|antigen process…			84.3601	128.282	0.604686	5e-05	0.00026084
ENSG00000051596	ENST00000432305///ENST00000515016///ENST00000265097///ENST00000505969///ENST00000514861///ENST00000513482///ENST00000510300///ENST00000511062///ENST00000513118///ENST00000513006///ENST00000514250///ENST00000628318	84321	THOC3|THO complex 3	chr5:175906938-176034680				25.5835	25.6532	0.00392916	0.98	0.98643
ENSG00000051620	ENST00000448741///ENST00000607197///ENST00000367697///ENST00000453452	23593	HEBP2|heme binding protein 2	chr6:138402584-138697288				98.5106	133.105	0.434213	0.0229	0.0599473
ENSG00000051825	ENST00000545974///ENST00000302373///ENST00000545556///ENST00000606704///ENST00000539024///ENST00000536198///ENST00000538250///ENST00000607619///ENST00000606321///ENST00000541823///ENST00000606326///ENST00000539336///ENST00000537854///ENST00000539639///ENST00000541437///ENST00000538169///ENST00000535049///ENST00000545406///ENST00000369865///ENST00000563178///ENST00000606320///ENST00000541076///ENS…	10198	MPHOSPH9|M-phase phosphoprotein 9	chr12:123152319-123272334				61.9732	24.4642	-1.34097	0.00225	0.00810809
ENSG00000052126	ENST00000540972///ENST00000429027///ENST00000299275///ENST00000538714///ENST00000535357///ENST00000538034///ENST00000538305///ENST00000536974///ENST00000534979///ENST00000510738///ENST00000538677///ENST00000538068///ENST00000537027///ENST00000538972///ENST00000424268///ENST00000539256	54477	PLEKHA5|pleckstrin homology domain containing, family A member 5	chr12:19129751-19376400				10.0988	7.18493	-0.491138	0.00275	0.00966858
ENSG00000052344	ENST00000317508///ENST00000568261///ENST00000567531///ENST00000567797///ENST00000564025///ENST00000567833	5652	PRSS8|protease, serine, 8	chr16:31131432-31135762	GO:0006508|proteolysis|///GO:0005615|extracellular space|///GO:0016021|integral component of membrane|///GO:0005576|extracellular region|///GO:0004252|serine-type endopeptidase activity|///GO:0005886|plasma membrane|///GO:0008236|serine-type peptidase activity|///GO:0005515|protein binding|///GO:0070062|extracellular exosome|///GO:0010765|positive regulation of sodium ion transport|			14.0525	56.0254	1.99525	5e-05	0.00026084
ENSG00000052723	ENST00000369528///ENST00000060969///ENST00000369524///ENST00000510745///ENST00000506320///ENST00000462123///ENST00000475335///ENST00000466657///ENST00000474562///ENST00000471969	80143	SIKE1|suppressor of IKBKE 1	chr1:114769478-114780685				157.747	132.997	-0.24622	0.38945	0.561101
ENSG00000052749	ENST00000491313///ENST00000479481///ENST00000536831///ENST00000315563///ENST00000465394///ENST00000487612///ENST00000490815///ENST00000479317///ENST00000618765///ENST00000439965///ENST00000622320///ENST00000621606///ENST00000619048///ENST00000370992///ENST00000414986	23223	RRP12|ribosomal RNA processing 12 homolog	chr10:97356357-97426076				8.64069	13.4054	0.633596	0.01375	0.0390618
ENSG00000052795	ENST00000264433///ENST00000504704///ENST00000505445///ENST00000512986///ENST00000504715///ENST00000505130	57600	FNIP2|folliculin interacting protein 2	chr4:158769137-159038760	GO:0006468|protein phosphorylation|///GO:0005737|cytoplasm|///GO:0005815|microtubule organizing center|///GO:0005886|plasma membrane|///GO:0008630|intrinsic apoptotic signaling pathway in response to DNA damage|///GO:0000122|negative regulation of transcription from RNA polymerase II promoter|///GO:0005654|nucleoplasm|///GO:0005515|protein binding|///GO:0033138|positive regulation of peptidyl-ser…			4.25821	3.26047	-0.385169	0.1358	0.256895
ENSG00000052802	ENST00000261507///ENST00000507013///ENST00000393766///ENST00000504317///ENST00000505270	6307	MSMO1|methylsterol monooxygenase 1	chr4:165327622-165343160				84.4323	60.0273	-0.492177	0.0014	0.00534625
ENSG00000052841	ENST00000299240///ENST00000039989///ENST00000534347///ENST00000530469///ENST00000526774///ENST00000524936///ENST00000525029///ENST00000530483///ENST00000534417///ENST00000525135///ENST00000525543///ENST00000533554///ENST00000418561///ENST00000529140///ENST00000533072	55761	TTC17|tetratricopeptide repeat domain 17	chr11:43311962-43494933				31.273	26.5248	-0.237574	0.41515	0.587947
ENSG00000052850	ENST00000329255	60529	ALX4|ALX homeobox 4	chr11:44260443-44310166				0.013184	0.00856731	-0.62187	1	1
ENSG00000053108	ENST00000265342///ENST00000509525///ENST00000511375///ENST00000507112///ENST00000514998///ENST00000510685///ENST00000621681	23105	FSTL4|follistatin-like 4	chr5:133160437-133612564	GO:0005509|calcium ion binding|///GO:0005576|extracellular region|///GO:0005515|protein binding|			4.37208	7.68607	0.813927	0.0016	0.00600031
ENSG00000053254	ENST00000557572///ENST00000345097///ENST00000557258///ENST00000555353///ENST00000553840///ENST00000556541///ENST00000555010///ENST00000557496///ENST00000557718///ENST00000553353///ENST00000556916///ENST00000555658///ENST00000554005///ENST00000557261///ENST00000555855///ENST00000555034///ENST00000553904///ENST00000261302///ENST00000615335	1112	FOXN3|forkhead box N3	chr14:89124870-89954777				7.40668	4.43207	-0.740846	0.0574	0.12893
ENSG00000053328	ENST00000338882///ENST00000490043	728464	METTL24|methyltransferase like 24	chr6:110180140-110358272	GO:0005576|extracellular region|///GO:0032259|methylation|///GO:0008168|methyltransferase activity|			0	0	0	1	1
ENSG00000053371	ENST00000235835///ENST00000330072///ENST00000489286///ENST00000481966///ENST00000492217	8574	AKR7A2|aldo-keto reductase family 7, member A2	chr1:19303964-19312146				35.4014	38.1394	0.107478	0.39145	0.563156
ENSG00000053372	ENST00000330263///ENST00000493700///ENST00000479559	51154	MRTO4|MRT4 homolog, ribosome maturation factor	chr1:19210500-19260128	GO:0005634|nucleus|///GO:0005737|cytoplasm|///GO:0005622|intracellular|///GO:0005730|nucleolus|///GO:0005654|nucleoplasm|///GO:0042254|ribosome biogenesis|///GO:0044822|poly(A) RNA binding|///GO:0031965|nuclear membrane|			38.8525	31.533	-0.301143	0.07	0.151579
ENSG00000053438	ENST00000062104///ENST00000346199	4826	NNAT|neuronatin	chr20:37492471-37527931				0.51296	0.310946	-0.722185	0.65915	0.797282
ENSG00000053501	ENST00000601662///ENST00000263897///ENST00000600970///ENST00000595101///ENST00000596136///ENST00000601592///ENST00000594724///ENST00000593597///ENST00000594399///ENST00000445667	55850	USE1|unconventional SNARE in the ER 1 homolog (S. cerevisiae)	chr19:17215345-17219829				5.94063	5.44627	-0.12535	0.49545	0.66321
ENSG00000053524	ENST00000328913///ENST00000473233///ENST00000478652///ENST00000464626///ENST00000468976///ENST00000488149///ENST00000447025///ENST00000414362///ENST00000475664///ENST00000459750///ENST00000492331///ENST00000482017///ENST00000461074	23101	MCF2L2|MCF.2 cell line derived transforming sequence-like 2	chr3:183178042-183428778	GO:0043547|positive regulation of GTPase activity|///GO:0005089|Rho guanyl-nucleotide exchange factor activity|///GO:0035023|regulation of Rho protein signal transduction|			0.356907	0.884116	1.30869	0.04185	0.0992712
ENSG00000053702	ENST00000337508///ENST00000542990///ENST00000542386	83714	NRIP2|nuclear receptor interacting protein 2	chr12:2794952-2941140				0.350542	0.197632	-0.82677	0.5652	0.724477
ENSG00000053747	ENST00000313654///ENST00000585600///ENST00000399516///ENST00000591749///ENST00000592519///ENST00000269217///ENST00000587184///ENST00000586751///ENST00000588770///ENST00000586709///ENST00000588164///ENST00000592442///ENST00000590104///ENST00000588004	3909	LAMA3|laminin, alpha 3	chr18:23689442-23955066				4.51633	12.1519	1.42796	5e-05	0.00026084
ENSG00000053770	ENST00000261558///ENST00000554931///ENST00000556995///ENST00000555448///ENST00000431972///ENST00000554213///ENST00000556723///ENST00000554863///ENST00000556377	55745	AP5M1|adaptor-related protein complex 5, mu 1 subunit	chr14:57200506-57298742				37.9296	33.692	-0.17092	0.61955	0.766764
ENSG00000053900	ENST00000315368///ENST00000510092///ENST00000505080///ENST00000505991///ENST00000507809///ENST00000507925///ENST00000503805///ENST00000505842///ENST00000504256///ENST00000515848///ENST00000506973	29945	ANAPC4|anaphase promoting complex subunit 4	chr4:25377212-25418498				28.8484	22.7959	-0.339715	0.0647	0.142156
ENSG00000053918	ENST00000496887///ENST00000155840///ENST00000345015///ENST00000335475///ENST00000380776///ENST00000526095	3784	KCNQ1|potassium channel, voltage gated KQT-like subfamily Q, member 1	chr11:2444683-2861568	GO:0016021|integral component of membrane|///GO:0055085|transmembrane transport|///GO:0016020|membrane|///GO:0008076|voltage-gated potassium channel complex|///GO:0071805|potassium ion transmembrane transport|///GO:0005249|voltage-gated potassium channel activity|///GO:0005216|ion channel activity|///GO:0006811|ion transport|///GO:0005764|lysosome|///GO:0005251|delayed rectifier potassium channel…			0.0775379	0.0344511	-1.17035	1	1
ENSG00000054116	ENST00000373166///ENST00000462715///ENST00000373163///ENST00000373162///ENST00000469757///ENST00000373159///ENST00000497251///ENST00000617904///ENST00000616074///ENST00000616395	27095	TRAPPC3|trafficking protein particle complex 3	chr1:36136569-36180849				53.5291	66.2136	0.306803	0.03295	0.081221
ENSG00000054118	ENST00000354618///ENST00000469141///ENST00000478853///ENST00000466743	9967	THRAP3|thyroid hormone receptor associated protein 3	chr1:36224415-36305357				76.5776	61.6592	-0.312607	0.09285	0.190234
ENSG00000054148	ENST00000371661///ENST00000492540///ENST00000247665///ENST00000462205///ENST00000497413///ENST00000463215	29085	PHPT1|phosphohistidine phosphatase 1	chr9:136791354-136957733				65.2019	41.3653	-0.656494	0.09035	0.186161
ENSG00000054179	ENST00000355097///ENST00000460614///ENST00000312665///ENST00000469106	954	ENTPD2|ectonucleoside triphosphate diphosphohydrolase 2	chr9:137048097-137054045	GO:0005524|ATP binding|///GO:0016021|integral component of membrane|///GO:0016787|hydrolase activity|///GO:0005789|endoplasmic reticulum membrane|///GO:0070062|extracellular exosome|///GO:0005515|protein binding|///GO:0005886|plasma membrane|///GO:0007186|G-protein coupled receptor signaling pathway|///GO:0030168|platelet activation|///GO:0005605|basal lamina|///GO:0017110|nucleoside-diphosphatas…			3.0702	8.76774	1.51387	5e-05	0.00026084
ENSG00000054219	ENST00000263636///ENST00000484559///ENST00000492955///ENST00000471164	4065	LY75|lymphocyte antigen 75	chr2:159712456-159904749				0.03889	0.0172477	-1.173	1	1
ENSG00000054267	ENST00000474953///ENST00000366603///ENST00000349213///ENST00000421364///ENST00000474401///ENST00000491632///ENST00000444620///ENST00000494543///ENST00000471257///ENST00000418304///ENST00000466653///ENST00000462969///ENST00000264183	51742	ARID4B|AT rich interactive domain 4B (RBP1-like)	chr1:235131182-235344532	GO:0006357|regulation of transcription from RNA polymerase II promoter|///GO:0005634|nucleus|///GO:0044212|transcription regulatory region DNA binding|///GO:0003677|DNA binding|///GO:0006351|transcription, DNA-templated|///GO:0005737|cytoplasm|///GO:0005654|nucleoplasm|///GO:0005515|protein binding|///GO:0006325|chromatin organization|///GO:0003674|molecular_function|///GO:0005575|cellular_compon…			26.3693	21.1564	-0.317766	0.1597	0.290681
ENSG00000054277	ENST00000462265///ENST00000366554///ENST00000469376///ENST00000490673///ENST00000463155///ENST00000478849	23596	OPN3|opsin 3	chr1:241532133-241802133				9.17635	29.3278	1.67627	5e-05	0.00026084
ENSG00000054282	ENST00000490065///ENST00000366541///ENST00000491888///ENST00000482234///ENST00000476722///ENST00000435549///ENST00000496361///ENST00000463012///ENST00000493334///ENST00000463042///ENST00000497459	10806	SDCCAG8|serologically defined colon cancer antigen 8	chr1:243256033-243851079				21.7257	21.7602	0.00228421	0.99415	0.995468
ENSG00000054356	ENST00000409251///ENST00000295718///ENST00000460801///ENST00000462351///ENST00000443981///ENST00000423636///ENST00000497977///ENST00000486480///ENST00000489650///ENST00000412847///ENST00000446182///ENST00000440552///ENST00000476930///ENST00000442029///ENST00000451506///ENST00000606213///ENST00000468454///ENST00000484986///ENST00000477819	5798	PTPRN|protein tyrosine phosphatase, receptor type, N	chr2:219289622-219309648				0.0115142	0.0376872	1.71066	1	1
ENSG00000054392	ENST00000261458///ENST00000367010///ENST00000426968///ENST00000367009///ENST00000537898///ENST00000541565///ENST00000545154///ENST00000413764///ENST00000545781	55733	HHAT|hedgehog acyltransferase	chr1:210328251-210676296				1.15977	4.11853	1.82829	5e-05	0.00026084
ENSG00000054523	ENST00000377093///ENST00000263934///ENST00000377086///ENST00000377083///ENST00000377081///ENST00000495136///ENST00000497835///ENST00000465635///ENST00000483340///ENST00000635499///ENST00000470616///ENST00000620295///ENST00000622724	23095	KIF1B|kinesin family member 1B	chr1:10210804-10381603				12.7242	11.2494	-0.177733	0.118	0.230048
ENSG00000054598	ENST00000380874	2296	FOXC1|forkhead box C1	chr6:1609971-1613897				6.47676	7.71674	0.25272	0.0512	0.117189
ENSG00000054611	ENST00000337137///ENST00000441936///ENST00000486163///ENST00000407381///ENST00000355704///ENST00000394449///ENST00000496139///ENST00000472791///ENST00000441162///ENST00000406733///ENST00000380995	25771	TBC1D22A|TBC1 domain family, member 22A	chr22:46762616-47175699				5.27636	5.37649	0.027121	0.85975	0.919402
ENSG00000054654	ENST00000344113///ENST00000341472///ENST00000556725///ENST00000554584///ENST00000557005///ENST00000555002///ENST00000557060///ENST00000394768///ENST00000555323///ENST00000553308///ENST00000553455///ENST00000555612///ENST00000557024///ENST00000553289///ENST00000556342///ENST00000555241///ENST00000553801///ENST00000556906///ENST00000555022///ENST00000553806///ENST00000554805///ENST00000554997///ENS…	23224	SYNE2|spectrin repeat containing, nuclear envelope 2	chr14:63852982-64338599				10.4926	11.6964	0.156694	0.4747	0.64373
ENSG00000054690	ENST00000329153///ENST00000558386///ENST00000561456///ENST00000558981///ENST00000557971///ENST00000561135///ENST00000561370///ENST00000558296///ENST00000560100///ENST00000558366///ENST00000559981///ENST00000561057///ENST00000559766///ENST00000559832///ENST00000559168///ENST00000558214	57475	PLEKHH1|pleckstrin homology domain containing, family H (with MyTH4 domain) member 1	chr14:67447083-67600287				17.5524	24.9606	0.507987	0.0438	0.103063
ENSG00000054793	ENST00000311637///ENST00000338821///ENST00000477492	10079	ATP9A|ATPase, class II, type 9A	chr20:51596513-51768634				36.9596	42.2025	0.191382	0.0715	0.153961
ENSG00000054796	ENST00000371263///ENST00000345868///ENST00000371260///ENST00000418127///ENST00000494972	23626	SPO11|SPO11 meiotic protein covalently bound to DSB	chr20:57329758-57343994				0	0	0	1	1
ENSG00000054803	ENST00000064571	140689	CBLN4|cerebellin 4 precursor	chr20:55997439-56005472				0.798358	0.0032133	-7.95684	0.15325	0.28192
ENSG00000054938	ENST00000529912///ENST00000525413///ENST00000376324///ENST00000263671///ENST00000376332///ENST00000534159///ENST00000534276///ENST00000528471///ENST00000528789///ENST00000622063	25884	CHRDL2|chordin-like 2	chr11:74696428-74731385	GO:0005515|protein binding|///GO:0005615|extracellular space|///GO:0005737|cytoplasm|///GO:0001503|ossification|///GO:0051216|cartilage development|///GO:0030154|cell differentiation|///GO:0030514|negative regulation of BMP signaling pathway|			0.272376	0	-16.6898	1	1
ENSG00000054965	ENST00000064778///ENST00000450446///ENST00000356467///ENST00000632101///ENST00000432223	23201	FAM168A|family with sequence similarity 168, member A	chr11:73400486-73598189	GO:0005515|protein binding|			21.9282	8.52422	-1.36315	5e-05	0.00026084
ENSG00000054967	ENST00000064780///ENST00000545687///ENST00000544075///ENST00000393580///ENST00000545886///ENST00000539134///ENST00000537771	84957	RELT|RELT tumor necrosis factor receptor	chr11:73376263-73397474	GO:0006955|immune response|///GO:0005737|cytoplasm|///GO:0006954|inflammatory response|///GO:0005887|integral component of plasma membrane|///GO:0042981|regulation of apoptotic process|///GO:0007275|multicellular organismal development|///GO:0097190|apoptotic signaling pathway|///GO:0042127|regulation of cell proliferation|///GO:0070062|extracellular exosome|///GO:0033209|tumor necrosis factor-me…			2.07162	1.08636	-0.931261	0.0002	0.000933714
ENSG00000054983	ENST00000555000///ENST00000261304///ENST00000544807///ENST00000393569///ENST00000393568///ENST00000555179///ENST00000557316///ENST00000557520///ENST00000474294///ENST00000622264///ENST00000477716///ENST00000554916///ENST00000556261///ENST00000554372///ENST00000556879///ENST00000555956	2581	GALC|galactosylceramidase	chr14:87710418-87993665				18.056	19.0104	0.0743083	0.7086	0.830492
ENSG00000055044	ENST00000264279///ENST00000426814///ENST00000488403///ENST00000492740///ENST00000472050///ENST00000467734///ENST00000492688///ENST00000478941///ENST00000433543///ENST00000478508	51602	NOP58|NOP58 ribonucleoprotein	chr2:202265715-202303666				185.382	143.102	-0.37346	0.00975	0.0290871
ENSG00000055070	ENST00000401088///ENST00000471507///ENST00000401089///ENST00000486763///ENST00000476423///ENST00000475554///ENST00000472351///ENST00000492354///ENST00000472461///ENST00000475078	26099	SZRD1|SUZ RNA binding domain containing 1	chr1:16352574-16437424				45.582	32.2415	-0.499544	0.0117	0.0340711
ENSG00000055118	ENST00000330883///ENST00000262186///ENST00000532957///ENST00000473610///ENST00000461280///ENST00000430723	3757	KCNH2|potassium channel, voltage gated eag related subfamily H, member 2	chr7:150944960-150978315				0.333186	1.48689	2.1579	5e-05	0.00026084
ENSG00000055130	ENST00000409469///ENST00000602748///ENST00000325222///ENST00000617797	8454	CUL1|cullin 1	chr7:148696466-148801036				46.473	45.0997	-0.0432761	0.7065	0.828823
ENSG00000055147	ENST00000351797///ENST00000522858///ENST00000520667///ENST00000518914///ENST00000518946///ENST00000520313///ENST00000518735///ENST00000517803///ENST00000522395///ENST00000518900///ENST00000523705///ENST00000519808///ENST00000518102///ENST00000522634///ENST00000517605///ENST00000521031///ENST00000524246///ENST00000616320	10827	FAM114A2|family with sequence similarity 114, member A2	chr5:153990127-154445850	GO:0005575|cellular_component|///GO:0008150|biological_process|///GO:0017076|purine nucleotide binding|			15.3488	12.0793	-0.345588	0.29275	0.454099
ENSG00000055163	ENST00000616178///ENST00000620254///ENST00000522463///ENST00000435847///ENST00000522637///ENST00000521420///ENST00000622696///ENST00000617629///ENST00000611075///ENST00000611925///ENST00000618329///ENST00000518456///ENST00000621516///ENST00000518511///ENST00000520942///ENST00000520960///ENST00000518555///ENST00000520424///ENST00000522892///ENST00000523383///ENST00000524058///ENST00000519663///ENS…	26999	CYFIP2|cytoplasmic FMR1 interacting protein 2	chr5:157260121-157575775				10.1667	11.4769	0.174877	0.53	0.693713
ENSG00000055208	ENST00000606202///ENST00000461481///ENST00000606797///ENST00000367456///ENST00000470466///ENST00000484505///ENST00000538427	23118	TAB2|TGF-beta activated kinase 1/MAP3K7 binding protein 2	chr6:149217925-149411613	GO:0008270|zinc ion binding|///GO:0050852|T cell receptor signaling pathway|///GO:0005886|plasma membrane|///GO:0005829|cytosol|///GO:0045087|innate immune response|///GO:0007249|I-kappaB kinase/NF-kappaB signaling|///GO:0051092|positive regulation of NF-kappaB transcription factor activity|///GO:0007507|heart development|///GO:0000187|activation of MAPK activity|///GO:0070530|K63-linked polyubiq…			55.419	29.72	-0.898944	5e-05	0.00026084
ENSG00000055211	ENST00000367419///ENST00000433539	116254	GINM1|glycoprotein integral membrane 1	chr6:149566293-149591748				55.5186	39.0801	-0.506535	0.0002	0.000933714
ENSG00000055332	ENST00000233057///ENST00000405334///ENST00000462861///ENST00000496059///ENST00000411537///ENST00000390013///ENST00000395127	5610	EIF2AK2|eukaryotic translation initiation factor 2-alpha kinase 2	chr2:37084450-37157065	GO:0004672|protein kinase activity|///GO:0005524|ATP binding|///GO:0006468|protein phosphorylation|///GO:0005634|nucleus|///GO:0005840|ribosome|///GO:0006351|transcription, DNA-templated|///GO:0005737|cytoplasm|///GO:0016020|membrane|///GO:0009615|response to virus|///GO:0018108|peptidyl-tyrosine phosphorylation|///GO:0005829|cytosol|///GO:0004674|protein serine/threonine kinase activity|///GO:00…			43.8516	63.7886	0.540667	0.00185	0.00681806
ENSG00000055483	ENST00000587010///ENST00000588130///ENST00000591052///ENST00000589225///ENST00000587379///ENST00000592326///ENST00000592231///ENST00000542802///ENST00000588086///ENST00000588467///ENST00000586066///ENST00000590312///ENST00000589254///ENST00000589424///ENST00000590546///ENST00000586531///ENST00000591942///ENST00000586896///ENST00000592907///ENST00000592275///ENST00000587783///ENST00000588365///ENS…	57602	USP36|ubiquitin specific peptidase 36	chr17:78787380-78841441				41.2007	35.5132	-0.214313	0.30815	0.472611
ENSG00000055609	ENST00000360104///ENST00000558084///ENST00000262189///ENST00000424877///ENST00000473186///ENST00000485241///ENST00000418061///ENST00000558665///ENST00000489110///ENST00000418673///ENST00000490130///ENST00000452749///ENST00000355193	58508	KMT2C|lysine (K)-specific methyltransferase 2C	chr7:152134921-152436005				13.7849	14.6739	0.0901614	0.60545	0.756514
ENSG00000055732	ENST00000370589///ENST00000474447///ENST00000341115///ENST00000370587///ENST00000490600///ENST00000475312	55283	MCOLN3|mucolipin 3	chr1:84999146-85133138				4.6585	2.04805	-1.18562	5e-05	0.00026084
ENSG00000055813	ENST00000407595	114800	CCDC85A|coiled-coil domain containing 85A	chr2:55952157-56386173				0.148216	0.119329	-0.312754	1	1
ENSG00000055917	ENST00000338086///ENST00000440577///ENST00000403432///ENST00000442400///ENST00000420234///ENST00000429419///ENST00000432105///ENST00000446940///ENST00000424110///ENST00000319801///ENST00000361078	23369	PUM2|pumilio RNA-binding family member 2	chr2:20248690-20352234	GO:0003723|RNA binding|///GO:0005737|cytoplasm|///GO:0048471|perinuclear region of cytoplasm|///GO:0044822|poly(A) RNA binding|///GO:0005515|protein binding|///GO:0031965|nuclear membrane|///GO:2000637|positive regulation of gene silencing by miRNA|///GO:0006417|regulation of translation|///GO:0003730|mRNA 3'-UTR binding|///GO:0010494|cytoplasmic stress granule|///GO:1900246|positive regulation o…			77.5041	33.205	-1.22287	5e-05	0.00026084
ENSG00000055950	ENST00000523148///ENST00000318325///ENST00000370241///ENST00000370242///ENST00000476012///ENST00000448244///ENST00000299179///ENST00000370236///ENST00000493646///ENST00000318364///ENST00000477279///ENST00000370234///ENST00000487059///ENST00000342071	84545	MRPL43|mitochondrial ribosomal protein L43	chr10:100969457-100994401	GO:0003735|structural constituent of ribosome|///GO:0006412|translation|///GO:0005743|mitochondrial inner membrane|///GO:0005762|mitochondrial large ribosomal subunit|///GO:0044822|poly(A) RNA binding|///GO:0005515|protein binding|///GO:0006996|organelle organization|///GO:0032543|mitochondrial translation|///GO:0070125|mitochondrial translational elongation|///GO:0005761|mitochondrial ribosome|/…			39.52	39.8178	0.01083	0.95375	0.970908
ENSG00000055955	ENST00000266041///ENST00000485816///ENST00000406595///ENST00000464000///ENST00000441637///ENST00000491663///ENST00000461966///ENST00000481977///ENST00000537897///ENST00000471505///ENST00000484632///ENST00000485894///ENST00000467462///ENST00000483372///ENST00000473904	3700	ITIH4|inter-alpha-trypsin inhibitor heavy chain family, member 4	chr3:52812974-52897596				0.451211	1.62649	1.84989	0.0308	0.0768767
ENSG00000055957	ENST00000273283///ENST00000480409///ENST00000628722///ENST00000487686///ENST00000478667///ENST00000494603///ENST00000428133///ENST00000484844///ENST00000405128///ENST00000482836///ENST00000494705///ENST00000537050	3697	ITIH1|inter-alpha-trypsin inhibitor heavy chain 1	chr3:52777591-52792068				0	0	0	1	1
ENSG00000056050	ENST00000393381///ENST00000515204///ENST00000506125	54969	C4orf27|chromosome 4 open reading frame 27	chr4:169729464-169757953	GO:0005634|nucleus|			19.6047	12.9405	-0.59931	0.0003	0.00135017
ENSG00000056097	ENST00000265069///ENST00000514356///ENST00000502988///ENST00000510369///ENST00000507465///ENST00000505366///ENST00000505204	51663	ZFR|zinc finger RNA binding protein	chr5:32354349-32444761				55.9511	42.0539	-0.411925	0.00485	0.0158171
ENSG00000056277	ENST00000370978///ENST00000447817	55609	ZNF280C|zinc finger protein 280C	chrX:130202710-130268899	GO:0006357|regulation of transcription from RNA polymerase II promoter|///GO:0046872|metal ion binding|///GO:0005634|nucleus|///GO:0006351|transcription, DNA-templated|///GO:0000981|RNA polymerase II transcription factor activity, sequence-specific DNA binding|///GO:0000977|RNA polymerase II regulatory region sequence-specific DNA binding|			5.67967	1.75682	-1.69284	5e-05	0.00026084
ENSG00000056291	ENST00000308744///ENST00000344413///ENST00000395999///ENST00000358749///ENST00000506359	10886	NPFFR2|neuropeptide FF receptor 2	chr4:72031803-72148067				0.0149737	0.0636068	2.08675	1	1
ENSG00000056487	ENST00000403565///ENST00000313237///ENST00000629843///ENST00000414269///ENST00000420689///ENST00000490679///ENST00000460507///ENST00000474327///ENST00000462631///ENST00000495348///ENST00000491522///ENST00000396103	112885	PHF21B|PHD finger protein 21B	chr22:44881161-45009999	GO:0008270|zinc ion binding|///GO:0005515|protein binding|///GO:0005634|nucleus|///GO:0006355|regulation of transcription, DNA-templated|///GO:0003682|chromatin binding|///GO:0042393|histone binding|///GO:0000977|RNA polymerase II regulatory region sequence-specific DNA binding|///GO:0003712|transcription cofactor activity|			0.457106	0.192907	-1.24462	0.03385	0.0831472
ENSG00000056558	ENST00000373887///ENST00000546084///ENST00000540010	7185	TRAF1|TNF receptor-associated factor 1	chr9:120902392-120929173				0.116767	0.374285	1.68051	5e-05	0.00026084
ENSG00000056586	ENST00000373670///ENST00000498479///ENST00000454740///ENST00000495727///ENST00000423239///ENST00000398671///ENST00000335387///ENST00000478216///ENST00000471874///ENST00000357244	54542	RC3H2|ring finger and CCCH-type domains 2	chr9:122844555-122905341				35.4945	17.4832	-1.02162	5e-05	0.00026084
ENSG00000056736	ENST00000288167///ENST00000475124///ENST00000494338	55540	IL17RB|interleukin 17 receptor B	chr3:53846579-53865800				7.68307	9.81062	0.352662	0.019	0.051276
ENSG00000056972	ENST00000368761///ENST00000359831///ENST00000340026///ENST00000492671///ENST00000368731///ENST00000368735///ENST00000368734///ENST00000368730///ENST00000464903///ENST00000532708///ENST00000528599///ENST00000392556	10758	TRAF3IP2|TRAF3 interacting protein 2	chr6:111299027-111606278				24.5746	22.4795	-0.128562	0.7097	0.831096
ENSG00000056998	ENST00000398806///ENST00000381163///ENST00000381161///ENST00000520904///ENST00000469234///ENST00000353656///ENST00000453106///ENST00000381157	8908	GYG2|glycogenin 2	chrX:2828787-2882818				3.51232	2.65966	-0.401181	0.0102	0.0302275
ENSG00000057019	ENST00000326840///ENST00000326857///ENST00000496736///ENST00000494614///ENST00000479144///ENST00000470393///ENST00000460008///ENST00000469648///ENST00000486004///ENST00000449482	131566	DCBLD2|discoidin, CUB and LCCL domain containing 2	chr3:98714329-98901689	GO:0005887|integral component of plasma membrane|///GO:0030522|intracellular receptor signaling pathway|///GO:0005515|protein binding|///GO:0030308|negative regulation of cell growth|///GO:0009986|cell surface|///GO:0042060|wound healing|			35.6094	15.2801	-1.22061	5e-05	0.00026084
ENSG00000057149	ENST00000283752///ENST00000332821///ENST00000356424	6317	SERPINB3|serpin peptidase inhibitor, clade B (ovalbumin), member 3	chr18:63637258-63726432				0	0	0	1	1
ENSG00000057252	ENST00000367619///ENST00000426956///ENST00000540564///ENST00000539888	6646	SOAT1|sterol O-acyltransferase 1	chr1:179293713-179358680	GO:0016021|integral component of membrane|///GO:0016020|membrane|///GO:0005789|endoplasmic reticulum membrane|///GO:0005783|endoplasmic reticulum|///GO:0008374|O-acyltransferase activity|///GO:0033344|cholesterol efflux|///GO:0000062|fatty-acyl-CoA binding|///GO:0005515|protein binding|///GO:0008203|cholesterol metabolic process|///GO:0015485|cholesterol binding|///GO:0042632|cholesterol homeosta…			14.9965	15.7185	0.0678355	0.75465	0.860329
ENSG00000057294	ENST00000340811///ENST00000070846///ENST00000546769///ENST00000549461///ENST00000552612///ENST00000546498///ENST00000546741///ENST00000613243	5318	PKP2|plakophilin 2	chr12:32790744-32896840				12.6236	7.40723	-0.76912	0.00315	0.0108591
ENSG00000057468	ENST00000263187	4438	MSH4|mutS homolog 4	chr1:75796881-75913238				0.00630374	0.0274177	2.12083	1	1
ENSG00000057593	ENST00000346342///ENST00000375581///ENST00000444337///ENST00000479674///ENST00000473085///ENST00000541084	2155	F7|coagulation factor VII (serum prothrombin conversion accelerator)	chr13:113105787-113120681				0.00442152	0.510339	6.85077	0.23615	0.38781
ENSG00000057608	ENST00000380191///ENST00000479928///ENST00000447751///ENST00000380181///ENST00000456041///ENST00000418688///ENST00000608581///ENST00000380127///ENST00000609712	2665	GDI2|GDP dissociation inhibitor 2	chr10:5765222-5842132	GO:0005737|cytoplasm|///GO:0016020|membrane|///GO:0007264|small GTPase mediated signal transduction|///GO:0015031|protein transport|///GO:0007165|signal transduction|///GO:0043547|positive regulation of GTPase activity|///GO:0005829|cytosol|///GO:0051056|regulation of small GTPase mediated signal transduction|///GO:0044822|poly(A) RNA binding|///GO:0005515|protein binding|///GO:0070062|extracellu…			335.219	255.896	-0.389544	0.0029	0.0101216
ENSG00000057657	ENST00000369091///ENST00000369096///ENST00000424894///ENST00000489365///ENST00000450060///ENST00000481163///ENST00000369089///ENST00000613999	639	PRDM1|PR domain containing 1, with ZNF domain	chr6:106086319-106109939				0.0759889	0.127892	0.751065	1	1
ENSG00000057663	ENST00000475645///ENST00000343245///ENST00000369076///ENST00000369070///ENST00000476518///ENST00000360666///ENST00000613993	9474	ATG5|autophagy related 5	chr6:106184475-106325820				42.8259	26.2268	-0.70744	5e-05	0.00026084
ENSG00000057704	ENST00000261226///ENST00000551457///ENST00000548918///ENST00000552239	57458	TMCC3|transmembrane and coiled-coil domain family 3	chr12:94567123-94650562	GO:0016021|integral component of membrane|			0.831735	2.64081	1.66678	5e-05	0.00026084
ENSG00000057757	ENST00000246151///ENST00000415372///ENST00000374524	57095	PITHD1|PITH (C-terminal proteasome-interacting domain of thioredoxin-like) domain containing 1	chr1:23778404-23788232				36.2184	48.3527	0.416873	0.0007	0.00289617
ENSG00000057935	ENST00000405592///ENST00000406652///ENST00000484780///ENST00000461256///ENST00000407270///ENST00000454356///ENST00000406911///ENST00000409019///ENST00000430763///ENST00000405094///ENST00000433553///ENST00000493983///ENST00000491314///ENST00000490611///ENST00000472767///ENST00000475383///ENST00000482875///ENST00000467925///ENST00000478602	57504	MTA3|metastasis associated 1 family, member 3	chr2:42494568-42756947	GO:0003677|DNA binding|///GO:0008270|zinc ion binding|///GO:0005634|nucleus|///GO:0006355|regulation of transcription, DNA-templated|///GO:0003700|transcription factor activity, sequence-specific DNA binding|///GO:0003682|chromatin binding|///GO:0043565|sequence-specific DNA binding|///GO:0043231|intracellular membrane-bounded organelle|///GO:0005654|nucleoplasm|///GO:0005737|cytoplasm|///GO:0005…			63.0525	66.5598	0.0780984	0.6302	0.775546
ENSG00000058056	ENST00000263966///ENST00000482333///ENST00000497380///ENST00000496897///ENST00000497155	8975	USP13|ubiquitin specific peptidase 13 (isopeptidase T-3)	chr3:179652754-179789401	GO:0008270|zinc ion binding|///GO:0005764|lysosome|///GO:0006511|ubiquitin-dependent protein catabolic process|///GO:0006355|regulation of transcription, DNA-templated|///GO:0006914|autophagy|///GO:0043161|proteasome-mediated ubiquitin-dependent protein catabolic process|///GO:0061136|regulation of proteasomal protein catabolic process|///GO:0004197|cysteine-type endopeptidase activity|///GO:0016…			24.9435	9.3804	-1.41094	5e-05	0.00026084
ENSG00000058063	ENST00000323116///ENST00000493826///ENST00000482794///ENST00000498086///ENST00000490303///ENST00000466758///ENST00000482070///ENST00000491699///ENST00000484691///ENST00000475636	23200	ATP11B|ATPase, class VI, type 11B	chr3:182793499-182921938				39.1989	23.5207	-0.736882	5e-05	0.00026084
ENSG00000058085	ENST00000493293///ENST00000264144///ENST00000461729///ENST00000476255	3918	LAMC2|laminin, gamma 2	chr1:183186237-183244900	GO:0005576|extracellular region|///GO:0007155|cell adhesion|///GO:0008544|epidermis development|///GO:0005515|protein binding|///GO:0022617|extracellular matrix disassembly|///GO:0030198|extracellular matrix organization|///GO:0034329|cell junction assembly|///GO:0031581|hemidesmosome assembly|///GO:0005604|basement membrane|///GO:0008201|heparin binding|///GO:0005610|laminin-5 complex|///GO:0005…			3.44652	10.1068	1.55211	0.0016	0.00600031
ENSG00000058091	ENST00000449528///ENST00000484035///ENST00000446224///ENST00000430760///ENST00000456689///ENST00000380050///ENST00000496279///ENST00000446790///ENST00000265741///ENST00000406263///ENST00000431029///ENST00000478540///ENST00000487145///ENST00000460493///ENST00000436577	5218	CDK14|cyclin-dependent kinase 14	chr7:90335222-91210590				1.5205	3.8265	1.33148	0.0342	0.0838915
ENSG00000058262	ENST00000464451///ENST00000243253///ENST00000481210///ENST00000491668///ENST00000424880///ENST00000483956///ENST00000498837	29927	SEC61A1|Sec61 translocon alpha 1 subunit	chr3:128051640-128408646				264.443	207.452	-0.350179	0.0943	0.192542
ENSG00000058272	ENST00000450142///ENST00000437004///ENST00000546762///ENST00000634739///ENST00000550903///ENST00000547253///ENST00000550351///ENST00000550299///ENST00000546369///ENST00000550107///ENST00000548908///ENST00000552892///ENST00000551781///ENST00000553081///ENST00000547330///ENST00000550007///ENST00000547131///ENST00000550001///ENST00000550510///ENST00000551191///ENST00000548318///ENST00000261207	4659	PPP1R12A|protein phosphatase 1, regulatory subunit 12A	chr12:79574978-79942712	GO:0004871|signal transducer activity|///GO:0005737|cytoplasm|///GO:0007264|small GTPase mediated signal transduction|///GO:0045944|positive regulation of transcription from RNA polymerase II promoter|///GO:0005813|centrosome|///GO:0007165|signal transduction|///GO:0005829|cytosol|///GO:0005654|nucleoplasm|///GO:0015629|actin cytoskeleton|///GO:0006470|protein dephosphorylation|///GO:0030155|regu…			99.5971	65.1819	-0.611632	0.0653	0.143154
ENSG00000058335	ENST00000558480///ENST00000419573///ENST00000394745///ENST00000559926///ENST00000560334///ENST00000623620///ENST00000560286///ENST00000560943///ENST00000561112	5923	RASGRF1|Ras protein-specific guanine nucleotide-releasing factor 1	chr15:78959946-79090773	GO:0007411|axon guidance|///GO:0007264|small GTPase mediated signal transduction|///GO:0035556|intracellular signal transduction|///GO:0007165|signal transduction|///GO:0043547|positive regulation of GTPase activity|///GO:0005886|plasma membrane|///GO:0005829|cytosol|///GO:0005089|Rho guanyl-nucleotide exchange factor activity|///GO:0035023|regulation of Rho protein signal transduction|///GO:0043…			0.0427925	0.305235	2.83449	0.0033	0.0113028
ENSG00000058404	ENST00000350811///ENST00000395749///ENST00000523845///ENST00000425809///ENST00000440254///ENST00000358707///ENST00000466584///ENST00000353625///ENST00000497584///ENST00000489429///ENST00000353185///ENST00000347193///ENST00000346990///ENST00000258682///ENST00000395747///ENST00000433930///ENST00000497127///ENST00000495819///ENST00000415369///ENST00000424197///ENST00000484972///ENST00000421607///ENS…	816	CAMK2B|calcium/calmodulin-dependent protein kinase II beta	chr7:44217149-44334577				3.78564	8.41546	1.1525	5e-05	0.00026084
ENSG00000058453	ENST00000466256///ENST00000375541///ENST00000445545///ENST00000467938///ENST00000492631///ENST00000467715///ENST00000494191///ENST00000486318///ENST00000498688///ENST00000477773///ENST00000497654///ENST00000465021///ENST00000465291	9696	CROCC|ciliary rootlet coiled-coil, rootletin	chr1:16739937-16972979				2.41447	2.20483	-0.13104	0.69265	0.819577
ENSG00000058600	ENST00000299853///ENST00000564209///ENST00000565358///ENST00000418581///ENST00000564883///ENST00000359210///ENST00000561494///ENST00000563024///ENST00000564061///ENST00000563766///ENST00000567022///ENST00000564750///ENST00000564256///ENST00000565551///ENST00000569757///ENST00000569787///ENST00000563282///ENST00000565117///ENST00000615879	55718///101060521	POLR3E|polymerase (RNA) III (DNA directed) polypeptide E (80kD)///POLR3E|DNA-directed RNA polymerase III subunit RPC5	chr16:22297374-22335103	GO:0005634|nucleus|///GO:0006351|transcription, DNA-templated|///GO:0005813|centrosome|///GO:0005829|cytosol|///GO:0001056|RNA polymerase III activity|///GO:0005666|DNA-directed RNA polymerase III complex|///GO:0006383|transcription from RNA polymerase III promoter|///GO:0045087|innate immune response|///GO:0005654|nucleoplasm|///GO:0051607|defense response to virus|///GO:0010467|gene expression|…			44.1841	58.5831	0.406956	0.02815	0.0712862
ENSG00000058668	ENST00000357681///ENST00000341360///ENST00000458092///ENST00000466407///ENST00000356729///ENST00000484746///ENST00000367218	493	ATP2B4|ATPase, Ca++ transporting, plasma membrane 4	chr1:203626560-203744081				13.6104	8.39064	-0.697853	5e-05	0.00026084
ENSG00000058673	ENST00000466470///ENST00000432282///ENST00000453771///ENST00000461980///ENST00000367214///ENST00000492823///ENST00000367212///ENST00000332127///ENST00000495527///ENST00000367210///ENST00000480354///ENST00000488411///ENST00000545588	9877///441155	ZC3H11A|zinc finger CCCH-type containing 11A///ZC3H11A|zinc finger CCCH-type domain-containing-like	chr1:203795653-203854124				86.1019	65.5041	-0.394459	0.01485	0.0415673
ENSG00000058729	ENST00000283109///ENST00000511293///ENST00000511012///ENST00000508447///ENST00000508991///ENST00000511920///ENST00000510384	55781	RIOK2|RIO kinase 2	chr5:97089074-97437217				59.8966	94.7011	0.660907	0.00015	0.000719971
ENSG00000058799	ENST00000464950///ENST00000371399///ENST00000469457///ENST00000480151///ENST00000412288///ENST00000465897///ENST00000472983///ENST00000072644	54432	YIPF1|Yip1 domain family, member 1	chr1:53851718-53889834	GO:0016021|integral component of membrane|///GO:0016020|membrane|///GO:0030133|transport vesicle|///GO:0005515|protein binding|///GO:0098779|mitophagy in response to mitochondrial depolarization|///GO:0002230|positive regulation of defense response to virus by host|			21.4888	34.12	0.667034	5e-05	0.00026084
ENSG00000058804	ENST00000371429///ENST00000480952	55706	NDC1|NDC1 transmembrane nucleoporin	chr1:53765459-53838860	GO:0016021|integral component of membrane|///GO:0016020|membrane|///GO:0015031|protein transport|///GO:0005643|nuclear pore|///GO:0017056|structural constituent of nuclear pore|///GO:0031965|nuclear membrane|///GO:0051028|mRNA transport|///GO:0051292|nuclear pore complex assembly|///GO:0031081|nuclear pore distribution|///GO:0005737|cytoplasm|///GO:0007129|synapsis|///GO:0007283|spermatogenesis|			19.9038	8.93703	-1.15518	5e-05	0.00026084
ENSG00000058866	ENST00000447054///ENST00000265022///ENST00000344484///ENST00000382164///ENST00000490452///ENST00000480809///ENST00000480933///ENST00000472506///ENST00000437018///ENST00000482566///ENST00000466466	1608	DGKG|diacylglycerol kinase, gamma 90kDa	chr3:186046307-186362237	GO:0005509|calcium ion binding|///GO:0005524|ATP binding|///GO:0005737|cytoplasm|///GO:0035556|intracellular signal transduction|///GO:0043231|intracellular membrane-bounded organelle|///GO:0016301|kinase activity|///GO:0016310|phosphorylation|///GO:0007165|signal transduction|///GO:0005886|plasma membrane|///GO:0030168|platelet activation|///GO:0004143|diacylglycerol kinase activity|///GO:000720…			0.0886442	0.213775	1.27	1	1
ENSG00000059122	ENST00000253928///ENST00000571140///ENST00000416288///ENST00000570425///ENST00000573525///ENST00000570759///ENST00000573564///ENST00000344592///ENST00000571580///ENST00000575604///ENST00000570752///ENST00000574985///ENST00000571983///ENST00000575679	84256	FLYWCH1|FLYWCH-type zinc finger 1	chr16:2911936-2954276				4.24487	7.74944	0.868371	0.0004	0.00175048
ENSG00000059145	ENST00000403703///ENST00000562537///ENST00000397464///ENST00000508903///ENST00000511095///ENST00000402641///ENST00000513783///ENST00000515195///ENST00000382757///ENST00000509981///ENST00000301712///ENST00000502438///ENST00000503648///ENST00000566707///ENST00000561783///ENST00000248104///ENST00000389221	64718	UNKL|unkempt family zinc finger-like	chr16:1351922-1414751	GO:0008270|zinc ion binding|///GO:0005634|nucleus|///GO:0005737|cytoplasm|///GO:0016567|protein ubiquitination|///GO:0016874|ligase activity|///GO:0005515|protein binding|///GO:0046872|metal ion binding|			7.19752	22.6907	1.65653	0.0149	0.0416894
ENSG00000059377	ENST00000493340///ENST00000462053///ENST00000473948///ENST00000425687///ENST00000474763///ENST00000481440///ENST00000438104///ENST00000336425///ENST00000448866///ENST00000422328///ENST00000492560///ENST00000455353///ENST00000458722///ENST00000411653///ENST00000476637///ENST00000462275///ENST00000414041///ENST00000469630///ENST00000494876///ENST00000263552///ENST00000414508///ENST00000416849	6916	TBXAS1|thromboxane A synthase 1 (platelet)	chr7:139561569-140020325				1.08821	5.21361	2.26032	0.0153	0.0426324
ENSG00000059378	ENST00000263549///ENST00000473341///ENST00000488726///ENST00000489809///ENST00000491598///ENST00000484111///ENST00000496624///ENST00000489383///ENST00000466597///ENST00000470515///ENST00000493262///ENST00000467638	64761	PARP12|poly (ADP-ribose) polymerase family, member 12	chr7:140023743-140063721				7.58602	54.2198	2.8374	5e-05	0.00026084
ENSG00000059573	ENST00000371224///ENST00000371221///ENST00000485428///ENST00000489386///ENST00000483788	5832	ALDH18A1|aldehyde dehydrogenase 18 family, member A1	chr10:95605928-95656706	GO:0005524|ATP binding|///GO:0008152|metabolic process|///GO:0005739|mitochondrion|///GO:0005737|cytoplasm|///GO:0005743|mitochondrial inner membrane|///GO:0055114|oxidation-reduction process|///GO:0016310|phosphorylation|///GO:0016491|oxidoreductase activity|///GO:0006561|proline biosynthetic process|///GO:0003824|catalytic activity|///GO:0055129|L-proline biosynthetic process|///GO:0044822|poly…			59.7008	71.8344	0.266924	0.1083	0.215023
ENSG00000059588	ENST00000040877///ENST00000483404///ENST00000462259///ENST00000496673///ENST00000471918///ENST00000484454///ENST00000468077///ENST00000481183///ENST00000463793	6894	TARBP1|TAR (HIV-1) RNA binding protein 1	chr1:234391312-234479103				19.8257	30.5443	0.623533	0.0141	0.0398715
ENSG00000059691	ENST00000263985///ENST00000510396///ENST00000515564///ENST00000515812///ENST00000503160///ENST00000510720///ENST00000507592///ENST00000513504///ENST00000505211///ENST00000515884///ENST00000511538///ENST00000512306///ENST00000515490///ENST00000508611	5188	GATB|glutamyl-tRNA(Gln) amidotransferase, subunit B	chr4:151670503-151761023				8.23571	8.69979	0.0790875	0.7208	0.839231
ENSG00000059728	ENST00000435990///ENST00000264444///ENST00000409442///ENST00000410000///ENST00000465446///ENST00000540449	4084	MXD1|MAX dimerization protein 1	chr2:69893559-69942945				19.187	12.2662	-0.645443	0.0089	0.0268573
ENSG00000059758	ENST00000261211///ENST00000543119///ENST00000542666///ENST00000548422///ENST00000550971///ENST00000549899///ENST00000551484///ENST00000553042///ENST00000551816///ENST00000552496///ENST00000548734///ENST00000552262	5128	CDK17|cyclin-dependent kinase 17	chr12:96278260-96400560				27.9627	22.9235	-0.286678	0.2591	0.414003
ENSG00000059769	ENST00000313525///ENST00000463589///ENST00000447096	548645	DNAJC25|DnaJ (Hsp40) homolog, subfamily C , member 25	chr9:111631351-111670246				6.44353	6.80308	0.0783366	0.7777	0.873891
ENSG00000059804	ENST00000075120///ENST00000543435///ENST00000486749///ENST00000469295///ENST00000479059///ENST00000490763///ENST00000495813///ENST00000544291///ENST00000544936///ENST00000476634///ENST00000541671	6515	SLC2A3|solute carrier family 2 (facilitated glucose transporter), member 3	chr12:7919229-7936275				0.125856	0.15183	0.270692	1	1
ENSG00000059915	ENST00000020673///ENST00000479172///ENST00000473507///ENST00000461698///ENST00000488194///ENST00000472685///ENST00000492902///ENST00000611678///ENST00000406432	5662	PSD|pleckstrin and Sec7 domain containing	chr10:102402616-102423136				0.537113	1.16162	1.11284	0.0131	0.0374427
ENSG00000060069	ENST00000613122///ENST00000075430///ENST00000591598///ENST00000590635///ENST00000587623///ENST00000590599///ENST00000585951///ENST00000299543	9150	CTDP1|CTD (carboxy-terminal domain, RNA polymerase II, polypeptide A) phosphatase, subunit 1	chr18:79679800-79756623	GO:0051301|cell division|///GO:0005634|nucleus|///GO:0006368|transcription elongation from RNA polymerase II promoter|///GO:0005737|cytoplasm|///GO:0005813|centrosome|///GO:0000922|spindle pole|///GO:0006366|transcription from RNA polymerase II promoter|///GO:0005654|nucleoplasm|///GO:0030496|midbody|///GO:0015629|actin cytoskeleton|///GO:0006470|protein dephosphorylation|///GO:0004721|phosphopro…			1.90174	2.1088	0.149097	0.38815	0.559957
ENSG00000060138	ENST00000279550///ENST00000228251///ENST00000540447///ENST00000540975///ENST00000546164///ENST00000536823///ENST00000366286///ENST00000542002///ENST00000366290///ENST00000542641///ENST00000541351///ENST00000544504///ENST00000539204///ENST00000544622///ENST00000546298///ENST00000544501///ENST00000536107///ENST00000540747	8531	YBX3|Y box binding protein 3	chr12:10699088-10723312	GO:0003677|DNA binding|///GO:0003676|nucleic acid binding|///GO:0005634|nucleus|///GO:0006355|regulation of transcription, DNA-templated|///GO:0003700|transcription factor activity, sequence-specific DNA binding|///GO:0006351|transcription, DNA-templated|///GO:0005737|cytoplasm|///GO:0003690|double-stranded DNA binding|///GO:0005923|bicellular tight junction|///GO:0048471|perinuclear region of cy…			343.965	196.685	-0.806378	0.02275	0.059666
ENSG00000060140	ENST00000075503///ENST00000542924///ENST00000542562///ENST00000538867///ENST00000535345///ENST00000541561	55359	STYK1|serine/threonine/tyrosine kinase 1	chr12:10618938-10674318				0.794207	1.85308	1.22234	0.0034	0.0115947
ENSG00000060237	ENST00000535572///ENST00000315939///ENST00000447667///ENST00000540360///ENST00000538787///ENST00000544965///ENST00000545285///ENST00000535698///ENST00000574564///ENST00000574679///ENST00000542543///ENST00000545055///ENST00000534872///ENST00000542424///ENST00000537603///ENST00000544559///ENST00000543065///ENST00000540885///ENST00000340908///ENST00000537687///ENST00000530271	65125	WNK1|WNK lysine deficient protein kinase 1	chr12:752592-911452				68.5044	28.8824	-1.24601	0.0003	0.00135017
ENSG00000060303	ENST00000498293		RPS17P5|	chr6:50857254-50857662				0.0474628	0.0897304	0.918802	1	1
ENSG00000060339	ENST00000536391///ENST00000265872///ENST00000538031///ENST00000543719///ENST00000541012///ENST00000543229///ENST00000539539///ENST00000543225///ENST00000536012///ENST00000494903///ENST00000540210///ENST00000483264///ENST00000479143///ENST00000543706///ENST00000539250///ENST00000398676///ENST00000480627///ENST00000630771	55749	CCAR1|cell division cycle and apoptosis regulator 1	chr10:68721011-68792377				127.436	118.895	-0.100086	0.56995	0.728568
ENSG00000060491	ENST00000290291///ENST00000370461///ENST00000450048///ENST00000621591	11054	OGFR|opioid growth factor receptor	chr20:62796452-62814000	GO:0005634|nucleus|///GO:0005737|cytoplasm|///GO:0016020|membrane|///GO:0038003|opioid receptor signaling pathway|///GO:0004872|receptor activity|///GO:0001558|regulation of cell growth|///GO:0005575|cellular_component|///GO:0004985|opioid receptor activity|			34.9378	56.2217	0.686339	0.00625	0.0196927
ENSG00000060558	ENST00000262958///ENST00000592455///ENST00000586082	2769	GNA15|guanine nucleotide binding protein (G protein), alpha 15 (Gq class)	chr19:3136192-3163769				0.00500157	0.202332	5.3382	1	1
ENSG00000060566	ENST00000078445///ENST00000595923///ENST00000602257///ENST00000602147///ENST00000598894	84699	CREB3L3|cAMP responsive element binding protein 3-like 3	chr19:4153600-4173054				0	0	0	1	1
ENSG00000060642	ENST00000430292///ENST00000472757///ENST00000078527///ENST00000431541///ENST00000374145///ENST00000455364	55650	PIGV|phosphatidylinositol glycan anchor biosynthesis, class V	chr1:26787471-26798398	GO:0097502|mannosylation|///GO:0006506|GPI anchor biosynthetic process|///GO:0004584|dolichyl-phosphate-mannose-glycolipid alpha-mannosyltransferase activity|///GO:0016021|integral component of membrane|///GO:0005789|endoplasmic reticulum membrane|///GO:0000030|mannosyltransferase activity|///GO:0006501|C-terminal protein lipidation|///GO:0044267|cellular protein metabolic process|///GO:0043687|p…			11.9745	14.5367	0.279736	0.077	0.163633
ENSG00000060656	ENST00000345512///ENST00000373779///ENST00000428026///ENST00000460170///ENST00000527027///ENST00000415600///ENST00000531385///ENST00000526080///ENST00000493601///ENST00000465525///ENST00000492954	10076	PTPRU|protein tyrosine phosphatase, receptor type, U	chr1:29236515-29326813				6.8071	11.9074	0.806742	0.0299	0.07505
ENSG00000060688	ENST00000263694///ENST00000486941///ENST00000489853///ENST00000373720///ENST00000491106///ENST00000474025///ENST00000463988	9410	SNRNP40|small nuclear ribonucleoprotein 40kDa (U5)	chr1:31259567-31296782				53.1361	39.2869	-0.435642	0.00985	0.0293275
ENSG00000060709	ENST00000261655///ENST00000540658///ENST00000536632///ENST00000535703///ENST00000544568///ENST00000536002	23504	RIMBP2|RIMS binding protein 2	chr12:130396136-130716281				0.00157816	0.0142441	3.17405	1	1
ENSG00000060718	ENST00000370096///ENST00000635193///ENST00000470170///ENST00000512756///ENST00000465209///ENST00000461720///ENST00000475980///ENST00000427239///ENST00000447608///ENST00000353414///ENST00000358392	1301	COL11A1|collagen, type XI, alpha 1	chr1:102876466-103108496				0	0.0335628	18.6778	1	1
ENSG00000060749	ENST00000399302///ENST00000527250///ENST00000527788///ENST00000528155///ENST00000524678///ENST00000528034	79832	QSER1|glutamine and serine rich 1	chr11:32893177-32993316				23.3193	13.0897	-0.833093	0.11245	0.221471
ENSG00000060762	ENST00000360961///ENST00000487218///ENST00000366868///ENST00000475708///ENST00000621685///ENST00000341756///ENST00000621630	51660	MPC1|mitochondrial pyruvate carrier 1	chr6:166364918-166383013	GO:0016021|integral component of membrane|///GO:0005739|mitochondrion|///GO:0005743|mitochondrial inner membrane|///GO:0006850|mitochondrial pyruvate transport|///GO:0044237|cellular metabolic process|///GO:0003674|molecular_function|///GO:0005575|cellular_component|///GO:0008150|biological_process|///GO:0044281|small molecule metabolic process|///GO:0006090|pyruvate metabolic process|///GO:19023…			19.3097	20.7225	0.101878	0.51755	0.683476
ENSG00000060971	ENST00000451419///ENST00000333167///ENST00000301810///ENST00000411549///ENST00000469559///ENST00000480865///ENST00000450296///ENST00000452171///ENST00000469600///ENST00000421218///ENST00000440176///ENST00000423611///ENST00000447223///ENST00000418880///ENST00000465181///ENST00000484284///ENST00000460424///ENST00000489559///ENST00000627515///ENST00000625927	30	ACAA1|acetyl-CoA acyltransferase 1	chr3:38039204-38137242	GO:0008152|metabolic process|///GO:0016020|membrane|///GO:0043231|intracellular membrane-bounded organelle|///GO:0003824|catalytic activity|///GO:0005515|protein binding|///GO:0016747|transferase activity, transferring acyl groups other than amino-acyl groups|///GO:0005777|peroxisome|///GO:0006635|fatty acid beta-oxidation|///GO:0044255|cellular lipid metabolic process|///GO:0044281|small molecul…			42.3943	70.3718	0.731128	5e-05	0.00026084
ENSG00000060982	ENST00000261192///ENST00000538118///ENST00000342945///ENST00000539282///ENST00000543099///ENST00000539780///ENST00000544418///ENST00000612790///ENST00000546285///ENST00000355164	586	BCAT1|branched chain amino-acid transaminase 1, cytosolic	chr12:24810021-24960158	GO:0008152|metabolic process|///GO:0005829|cytosol|///GO:0003824|catalytic activity|///GO:0008283|cell proliferation|///GO:0044281|small molecule metabolic process|///GO:0034641|cellular nitrogen compound metabolic process|///GO:0009082|branched-chain amino acid biosynthetic process|///GO:0052654|L-leucine transaminase activity|///GO:0052655|L-valine transaminase activity|///GO:0052656|L-isoleuci…			0.08404	0.140695	0.743418	1	1
ENSG00000061273	ENST00000080059///ENST00000354334///ENST00000459625///ENST00000548938///ENST00000470668///ENST00000548080///ENST00000549883///ENST00000552960///ENST00000477203///ENST00000380610///ENST00000547259///ENST00000427332///ENST00000471235///ENST00000488927///ENST00000477937///ENST00000491464///ENST00000463732///ENST00000485796///ENST00000425451///ENST00000430670///ENST00000422254///ENST00000440293///ENS…	51564	HDAC7|histone deacetylase 7	chr12:47706084-47837898				13.3801	18.7806	0.489157	0.0829	0.173727
ENSG00000061337	ENST00000381569///ENST00000522290///ENST00000265801///ENST00000616228	11178	LZTS1|leucine zipper, putative tumor suppressor 1	chr8:20246164-20303963				0	0	0	1	1
ENSG00000061455	ENST00000407847///ENST00000434521///ENST00000464424///ENST00000427739	93166	PRDM6|PR domain containing 6	chr5:123087247-123194266	GO:0003676|nucleic acid binding|///GO:0046872|metal ion binding|///GO:0005634|nucleus|///GO:0006351|transcription, DNA-templated|///GO:0018024|histone-lysine N-methyltransferase activity|///GO:0034968|histone lysine methylation|///GO:0005515|protein binding|///GO:0045892|negative regulation of transcription, DNA-templated|///GO:0042803|protein homodimerization activity|///GO:0022008|neurogenesis|…			3.49388	8.11397	1.21558	0.06325	0.139642
ENSG00000061492	ENST00000506684///ENST00000361560///ENST00000504809///ENST00000398754	7478	WNT8A|wingless-type MMTV integration site family, member 8A	chr5:138083891-138092365				0	0	0	1	1
ENSG00000061656	ENST00000374273///ENST00000463973///ENST00000462896///ENST00000454819///ENST00000468248///ENST00000498203///ENST00000430878	6676	SPAG4|sperm associated antigen 4	chr20:35615891-35621049				4.01076	1.86598	-1.10394	0.0001	0.000496109
ENSG00000061676	ENST00000361354///ENST00000360982///ENST00000477988///ENST00000478449///ENST00000471640///ENST00000492058///ENST00000493359///ENST00000495619	10787	NCKAP1|NCK-associated protein 1	chr2:182909114-183038858				124.767	110.742	-0.172023	0.32545	0.491807
ENSG00000061794	ENST00000081029///ENST00000536569///ENST00000538315///ENST00000542791///ENST00000542199	60488	MRPS35|mitochondrial ribosomal protein S35	chr12:27710772-27756295				76.3852	58.1737	-0.392927	0.0206	0.0549147
ENSG00000061918	ENST00000505154///ENST00000502959///ENST00000505764///ENST00000507146///ENST00000264424///ENST00000503520///ENST00000513437	2983	GUCY1B3|guanylate cyclase 1, soluble, beta 3	chr4:155758991-155807591				0.0443837	6.74229	7.24706	5e-05	0.00026084
ENSG00000061936	ENST00000540469///ENST00000261674///ENST00000538548///ENST00000535399///ENST00000535236///ENST00000541286///ENST00000542813///ENST00000535202///ENST00000537164///ENST00000539506///ENST00000537582	6433	SFSWAP|splicing factor, suppressor of white-apricot family	chr12:131711080-131799737	GO:0006397|mRNA processing|///GO:0003723|RNA binding|///GO:0005634|nucleus|///GO:0006355|regulation of transcription, DNA-templated|///GO:0006351|transcription, DNA-templated|///GO:0006396|RNA processing|///GO:0008380|RNA splicing|///GO:0048025|negative regulation of mRNA splicing, via spliceosome|///GO:0000380|alternative mRNA splicing, via spliceosome|///GO:0000395|mRNA 5'-splice site recogniti…			27.6867	23.5091	-0.235976	0.3807	0.551773
ENSG00000061938	ENST00000416152///ENST00000381916///ENST00000333602///ENST00000420716///ENST00000428187///ENST00000495247///ENST00000464041///ENST00000439230///ENST00000481865///ENST00000424563///ENST00000478623///ENST00000411741///ENST00000489628///ENST00000478715///ENST00000468680///ENST00000486523///ENST00000438207///ENST00000430929///ENST00000468819///ENST00000447060///ENST00000433111///ENST00000427576	10188	TNK2|tyrosine kinase, non-receptor, 2	chr3:195863363-195911945				8.42957	8.367	-0.0107493	0.9606	0.974849
ENSG00000061987	ENST00000393630///ENST00000546600///ENST00000549378///ENST00000547095///ENST00000552738///ENST00000393629///ENST00000552115///ENST00000549286///ENST00000551307///ENST00000547287///ENST00000549539///ENST00000546751///ENST00000551397	23041	MON2|MON2 homolog, regulator of endosome-to-Golgi trafficking	chr12:62466816-62600479				29.4883	40.8159	0.46899	0.02025	0.0540992
ENSG00000062038	ENST00000565453///ENST00000264012///ENST00000429102///ENST00000542274///ENST00000566808///ENST00000569036///ENST00000567674///ENST00000568292///ENST00000569080///ENST00000569117	1001	CDH3|cadherin 3, type 1, P-cadherin (placental)	chr16:68636188-68722616				71.6897	22.552	-1.66851	5e-05	0.00026084
ENSG00000062096	ENST00000381127///ENST00000359361	416	ARSF|arylsulfatase F	chrX:3041470-3112726				0	0	0	1	1
ENSG00000062194	ENST00000424459///ENST00000514387///ENST00000506184///ENST00000511209///ENST00000264779///ENST00000513732///ENST00000513524///ENST00000309096///ENST00000515484	65056	GPBP1|GC-rich promoter binding protein 1	chr5:57173947-57264679				89.0861	86.5787	-0.0411875	0.7772	0.873673
ENSG00000062282	ENST00000603276///ENST00000604935///ENST00000228027///ENST00000605608///ENST00000604733///ENST00000605099///ENST00000603363///ENST00000603865///ENST00000376262	84649	DGAT2|diacylglycerol O-acyltransferase 2	chr11:75758454-75803415				10.4955	15.5773	0.56967	0.0037	0.0125006
ENSG00000062370	ENST00000354340///ENST00000337401///ENST00000587909///ENST00000590687///ENST00000592151///ENST00000588057	7771	ZNF112|zinc finger protein 112	chr19:44326554-44448578				2.91747	0.349335	-3.06204	5e-05	0.00026084
ENSG00000062485	ENST00000549143///ENST00000548567///ENST00000351328///ENST00000548746///ENST00000542324///ENST00000546621///ENST00000546891///ENST00000546585///ENST00000548849///ENST00000552331///ENST00000549221///ENST00000546930///ENST00000548041///ENST00000551936///ENST00000550734///ENST00000551253///ENST00000547449///ENST00000547912///ENST00000552688///ENST00000551473///ENST00000547298///ENST00000551137///ENS…	1431	CS|citrate synthase	chr12:56271698-56334053				194.904	241.105	0.306894	0.1522	0.280356
ENSG00000062524	ENST00000355166///ENST00000263800///ENST00000563518///ENST00000561619///ENST00000453182///ENST00000569283	4058	LTK|leukocyte receptor tyrosine kinase	chr15:41503637-41513887	GO:0004672|protein kinase activity|///GO:0005524|ATP binding|///GO:0006468|protein phosphorylation|///GO:0016020|membrane|///GO:0005622|intracellular|///GO:0007165|signal transduction|///GO:0005886|plasma membrane|///GO:0004714|transmembrane receptor protein tyrosine kinase activity|///GO:0018108|peptidyl-tyrosine phosphorylation|///GO:0043066|negative regulation of apoptotic process|///GO:000588…			0.0375728	0.0267808	-0.488487	1	1
ENSG00000062582	ENST00000317534///ENST00000418740///ENST00000483330///ENST00000467084///ENST00000414932	64951	MRPS24|mitochondrial ribosomal protein S24	chr7:43866557-43926411				61.2507	51.7336	-0.243624	0.2228	0.371132
ENSG00000062598	ENST00000290246///ENST00000467800///ENST00000372176///ENST00000452857///ENST00000352077///ENST00000464448///ENST00000425546///ENST00000462491///ENST00000481852///ENST00000488853///ENST00000450812///ENST00000480042///ENST00000469801///ENST00000460474///ENST00000497412///ENST00000487583///ENST00000462593///ENST00000396391	63916	ELMO2|engulfment and cell motility 2	chr20:46364550-46459276	GO:0005737|cytoplasm|///GO:0016020|membrane|///GO:0060326|cell chemotaxis|///GO:0006915|apoptotic process|///GO:0005829|cytosol|///GO:0045087|innate immune response|///GO:0007010|cytoskeleton organization|///GO:0005515|protein binding|///GO:0038096|Fc-gamma receptor signaling pathway involved in phagocytosis|///GO:0048010|vascular endothelial growth factor receptor signaling pathway|///GO:0017124…			27.1212	32.0236	0.239717	0.1973	0.339216
ENSG00000062650	ENST00000484070///ENST00000298767///ENST00000372075///ENST00000495124///ENST00000489996///ENST00000618527///ENST00000263070	23063	WAPL|WAPL cohesin release factor	chr10:86435255-86521815				40.4061	26.4157	-0.613177	0.01245	0.0359354
ENSG00000062716	ENST00000588915///ENST00000262291///ENST00000593168///ENST00000586245///ENST00000585847///ENST00000587945///ENST00000588131///ENST00000589823///ENST00000592106///ENST00000591315///ENST00000587259///ENST00000592619///ENST00000591877///ENST00000591782///ENST00000588617///ENST00000592790///ENST00000587470	81671	VMP1|vacuole membrane protein 1	chr17:59618552-59842255				1382.85	722.271	-0.937033	0.0069	0.0214618
ENSG00000062725	ENST00000083182///ENST00000589341///ENST00000592995///ENST00000590244///ENST00000588668///ENST00000585368	10513	APPBP2|amyloid beta precursor protein (cytoplasmic tail) binding protein 2	chr17:60443148-60526219				399.548	222.949	-0.841659	5e-05	0.00026084
ENSG00000062822	ENST00000600859///ENST00000440232///ENST00000601098///ENST00000599857///ENST00000600746///ENST00000593887///ENST00000595904///ENST00000596425///ENST00000593407///ENST00000593981///ENST00000596648///ENST00000597963///ENST00000596221///ENST00000613923	5424	POLD1|polymerase (DNA directed), delta 1, catalytic subunit	chr19:50384203-50431313				8.8765	3.84565	-1.20676	5e-05	0.00026084
ENSG00000063015	ENST00000360295///ENST00000540632///ENST00000317338///ENST00000540419///ENST00000535262///ENST00000442608///ENST00000544224///ENST00000539265///ENST00000585644///ENST00000335960	124925	SEZ6|seizure related 6 homolog (mouse)	chr17:28905249-29057220				0.0159716	0.118868	2.89578	1	1
ENSG00000063046	ENST00000262056///ENST00000551527///ENST00000549077///ENST00000549645///ENST00000551002///ENST00000420463///ENST00000416762///ENST00000550704///ENST00000549481///ENST00000552490///ENST00000550390///ENST00000550025///ENST00000553209///ENST00000549592	1975	EIF4B|eukaryotic translation initiation factor 4B	chr12:53006157-53079420				265.26	244.415	-0.118073	0.33995	0.507779
ENSG00000063127	ENST00000335875///ENST00000454748///ENST00000598828///ENST00000598221///ENST00000594180///ENST00000597969///ENST00000594917	28968	SLC6A16|solute carrier family 6, member 16	chr19:49289637-49325225	GO:0016021|integral component of membrane|///GO:0005622|intracellular|///GO:0003333|amino acid transmembrane transport|///GO:0005887|integral component of plasma membrane|///GO:0005328|neurotransmitter:sodium symporter activity|///GO:0006836|neurotransmitter transport|///GO:0015171|amino acid transmembrane transporter activity|///GO:0005326|neurotransmitter transporter activity|///GO:0055085|tran…			0.132592	0.858051	2.69407	0.00015	0.000719971
ENSG00000063169	ENST00000396720///ENST00000594866///ENST00000602258///ENST00000614245	29998	GLTSCR1|glioma tumor suppressor candidate region gene 1	chr19:47607523-47743134				6.81926	4.68593	-0.541278	0.0915	0.188076
ENSG00000063176	ENST00000245222///ENST00000601712///ENST00000600537///ENST00000598088///ENST00000426514///ENST00000597434///ENST00000601704///ENST00000593308///ENST00000599033///ENST00000599748///ENST00000599029///ENST00000598574///ENST00000340932	56848	SPHK2|sphingosine kinase 2	chr19:48615327-48637438				2.61884	2.23914	-0.225987	0.79255	0.881679
ENSG00000063177	ENST00000552347///ENST00000549920///ENST00000547897///ENST00000549533///ENST00000084795///ENST00000550645///ENST00000552588///ENST00000551749///ENST00000547892///ENST00000546623///ENST00000549370///ENST00000549273///ENST00000550973///ENST00000552705///ENST00000552851///ENST00000550671	6141	RPL18|ribosomal protein L18	chr19:48615327-48637438	GO:0003723|RNA binding|///GO:0003735|structural constituent of ribosome|///GO:0006412|translation|///GO:0006414|translational elongation|///GO:0005634|nucleus|///GO:0005840|ribosome|///GO:0005737|cytoplasm|///GO:0016020|membrane|///GO:0005622|intracellular|///GO:0005730|nucleolus|///GO:0005829|cytosol|///GO:0006413|translational initiation|///GO:0006614|SRP-dependent cotranslational protein targe…			857.174	850.891	-0.0106131	0.93555	0.960297
ENSG00000063180	ENST00000084798///ENST00000599267///ENST00000594088///ENST00000596080	770	CA11|carbonic anhydrase XI	chr19:48637941-48682245				2.18916	15.231	2.79856	5e-05	0.00026084
ENSG00000063241	ENST00000438389///ENST00000590921///ENST00000425675///ENST00000085068///ENST00000587226///ENST00000589080///ENST00000591718///ENST00000589108	79763	ISOC2|isochorismatase domain containing 2	chr19:55452984-55462343				13.0499	12.5773	-0.05322	0.7296	0.844718
ENSG00000063244	ENST00000450554///ENST00000308924///ENST00000588850///ENST00000587196///ENST00000592867///ENST00000592874///ENST00000590551///ENST00000587275	11338	U2AF2|U2 small nuclear RNA auxiliary factor 2	chr19:55654145-55674715				103.214	72.0448	-0.518677	0.0013	0.00502101
ENSG00000063245	ENST00000270460///ENST00000085079///ENST00000411543///ENST00000591743///ENST00000586194///ENST00000589704///ENST00000587937	29924	EPN1|epsin 1	chr19:55675225-55738402				11.3291	8.84131	-0.357699	0.01455	0.0409083
ENSG00000063322	ENST00000599417///ENST00000315588///ENST00000600973///ENST00000594368///ENST00000599213///ENST00000596297///ENST00000615911	55588	MED29|mediator complex subunit 29	chr19:39391302-39400637				20.7317	13.122	-0.65985	5e-05	0.00026084
ENSG00000063438	ENST00000505113///ENST00000316418///ENST00000512529///ENST00000514523///ENST00000510400///ENST00000515206///ENST00000504625///ENST00000506456///ENST00000510910///ENST00000511487///ENST00000507048	57491	AHRR|aryl-hydrocarbon receptor repressor	chr5:271620-438291	GO:0003677|DNA binding|///GO:0006355|regulation of transcription, DNA-templated|///GO:0006351|transcription, DNA-templated|///GO:0005737|cytoplasm|///GO:0046983|protein dimerization activity|///GO:0000122|negative regulation of transcription from RNA polymerase II promoter|///GO:0001191|transcriptional repressor activity, RNA polymerase II transcription factor binding|///GO:0009410|response to xe…			0.248199	0.664665	1.42113	0.0372	0.089958
ENSG00000063515	ENST00000086933	2928	GSC2|goosecoid homeobox 2	chr22:19148575-19150283				0	0.0122366	18.6778	1	1
ENSG00000063587	ENST00000370251///ENST00000370249///ENST00000438239	10838	ZNF275|zinc finger protein 275	chrX:153334154-153360110				3.70408	5.03475	0.442802	0.0008	0.00326586
ENSG00000063601	ENST00000493995///ENST00000439546///ENST00000429965///ENST00000434699///ENST00000485376///ENST00000370390///ENST00000490316///ENST00000445323///ENST00000438018///ENST00000436701///ENST00000488357///ENST00000493480///ENST00000370387///ENST00000542156	8776	MTMR1|myotubularin related protein 1	chrX:150692970-150765103				25.8965	11.5183	-1.16883	5e-05	0.00026084
ENSG00000063660	ENST00000264039///ENST00000469694///ENST00000420138///ENST00000426280///ENST00000427506///ENST00000425056///ENST00000495100///ENST00000455111///ENST00000466624	2817	GPC1|glypican 1	chr2:240435670-240468078				5.59234	14.9997	1.42341	5e-05	0.00026084
ENSG00000063761	ENST00000238561///ENST00000556048///ENST00000393639///ENST00000557501///ENST00000341211///ENST00000555333///ENST00000556560///ENST00000555217	57143	ADCK1|aarF domain containing kinase 1	chr14:77800082-77935012				4.25085	6.62366	0.639878	0.0016	0.00600031
ENSG00000063854	ENST00000564445///ENST00000566644///ENST00000397356///ENST00000455446///ENST00000397353///ENST00000567398///ENST00000566709///ENST00000569339///ENST00000569700///ENST00000567190///ENST00000564518///ENST00000565097	3029	HAGH|hydroxyacylglutathione hydrolase	chr16:1795619-1884294				23.7436	44.492	0.906006	0.0039	0.0130929
ENSG00000063978	ENST00000503659///ENST00000504224///ENST00000314289///ENST00000502316///ENST00000509388///ENST00000507247///ENST00000509258///ENST00000511843///ENST00000504782///ENST00000513284///ENST00000507784///ENST00000513578///ENST00000511892///ENST00000511859///ENST00000513643///ENST00000503123///ENST00000509206///ENST00000506706///ENST00000511600///ENST00000513450///ENST00000508235///ENST00000541204	6047	RNF4|ring finger protein 4	chr4:2418973-2732565				80.3962	59.1519	-0.442704	0.02795	0.0708437
ENSG00000064012	ENST00000392263///ENST00000432109///ENST00000490682///ENST00000264275///ENST00000471383///ENST00000450491///ENST00000440732///ENST00000392258///ENST00000447616///ENST00000358485///ENST00000437283///ENST00000413726///ENST00000490412///ENST00000339403///ENST00000323492///ENST00000429881///ENST00000424461///ENST00000444430///ENST00000392266///ENST00000264274	841	CASP8|caspase 8, apoptosis-related cysteine peptidase	chr2:201233442-201287711				26.1553	59.8874	1.19515	0.00835	0.0254163
ENSG00000064042	ENST00000513024///ENST00000509638///ENST00000508501///ENST00000512946///ENST00000313860///ENST00000512228///ENST00000512632///ENST00000514190///ENST00000512820///ENST00000511424///ENST00000446625///ENST00000515847///ENST00000503057///ENST00000511496///ENST00000514096///ENST00000509277///ENST00000509454///ENST00000396595///ENST00000381753///ENST00000508466///ENST00000515785///ENST00000505705	22998	LIMCH1|LIM and calponin homology domains 1	chr4:41359606-41700044				0.795798	6.39302	3.00602	5e-05	0.00026084
ENSG00000064102	ENST00000538155///ENST00000261191///ENST00000538016///ENST00000542392///ENST00000536232///ENST00000538727///ENST00000544548///ENST00000538748///ENST00000537336	55726	ASUN|asunder spermatogenesis regulator	chr12:26905180-26938326				69.3601	40.0904	-0.790847	5e-05	0.00026084
ENSG00000064115	ENST00000343028///ENST00000544179///ENST00000545344///ENST00000545303///ENST00000537406///ENST00000535260///ENST00000543882///ENST00000541081///ENST00000542667///ENST00000543655///ENST00000535819///ENST00000543803///ENST00000542019///ENST00000539741///ENST00000543088///ENST00000535423///ENST00000512808///ENST00000545600///ENST00000539399	51768	TM7SF3|transmembrane 7 superfamily member 3	chr12:26971585-27014434				403.781	96.8432	-2.05985	5e-05	0.00026084
ENSG00000064195	ENST00000434704///ENST00000512495	1747	DLX3|distal-less homeobox 3	chr17:49990004-49995224				3.74927	0.794	-2.2394	5e-05	0.00026084
ENSG00000064199	ENST00000227135///ENST00000532692///ENST00000529498///ENST00000524614	53340	SPA17|sperm autoantigenic protein 17	chr11:124622835-124697518				11.5816	6.45965	-0.84231	0.0325	0.0802932
ENSG00000064201	ENST00000437313///ENST00000461200///ENST00000182290///ENST00000446063///ENST00000493924///ENST00000484104///ENST00000479508///ENST00000498313///ENST00000483227///ENST00000381121///ENST00000493948///ENST00000339046///ENST00000451520///ENST00000381117///ENST00000484523///ENST00000486011///ENST00000612299	10077	TSPAN32|tetraspanin 32	chr11:2295644-2318200				0.103941	0.206309	0.989042	1	1
ENSG00000064205	ENST00000372868///ENST00000372865///ENST00000497421///ENST00000190983///ENST00000465000///ENST00000471629	8839	WISP2|WNT1 inducible signaling pathway protein 2	chr20:44656450-44810338				28.7366	1.20653	-4.57396	5e-05	0.00026084
ENSG00000064218	ENST00000190165///ENST00000417254	58524	DMRT3|doublesex and mab-3 related transcription factor 3	chr9:976963-991731				0	0.00513173	18.6778	1	1
ENSG00000064225	ENST00000489112///ENST00000483910///ENST00000460774///ENST00000469105///ENST00000466482///ENST00000462152///ENST00000486249///ENST00000497008///ENST00000486334///ENST00000480133///ENST00000497621///ENST00000465004///ENST00000476833///ENST00000468553///ENST00000490684///ENST00000485391///ENST00000495376///ENST00000492254///ENST00000477574///ENST00000485145///ENST00000474595///ENST00000477899///ENS…	10402	ST3GAL6|ST3 beta-galactoside alpha-2,3-sialyltransferase 6	chr3:98714329-98901689				0.161503	0.201313	0.317881	1	1
ENSG00000064270	ENST00000262429///ENST00000416219///ENST00000565631///ENST00000569207///ENST00000565546///ENST00000420010///ENST00000565927///ENST00000568160///ENST00000563340///ENST00000564099///ENST00000567892///ENST00000567222///ENST00000624933///ENST00000567629///ENST00000566874	9914	ATP2C2|ATPase, Ca++ transporting, type 2C, member 2	chr16:84368526-84467361				16.7964	17.2944	0.0421515	0.8641	0.921844
ENSG00000064300	ENST00000172229///ENST00000509200///ENST00000504201	4804	NGFR|nerve growth factor receptor	chr17:49494222-49583827				0.46669	0.0924403	-2.33587	0.00045	0.0019463
ENSG00000064309	ENST00000392693///ENST00000531738///ENST00000263577///ENST00000534661///ENST00000531830///ENST00000525625///ENST00000531586///ENST00000527967///ENST00000534818	50937	CDON|cell adhesion associated, oncogene regulated	chr11:125950115-126063335				2.5808	0.836431	-1.6255	5e-05	0.00026084
ENSG00000064313	ENST00000378164///ENST00000529653///ENST00000526969///ENST00000519355///ENST00000523078///ENST00000523098///ENST00000523904///ENST00000523734///ENST00000521007	6873	TAF2|TAF2 RNA polymerase II, TATA box binding protein (TBP)-associated factor, 150kDa	chr8:119730774-119832863				46.8041	27.8671	-0.74807	0.0001	0.000496109
ENSG00000064393	ENST00000406875///ENST00000428878///ENST00000342645	28996	HIPK2|homeodomain interacting protein kinase 2	chr7:139561569-140020325				5.62818	8.19689	0.542407	0.0001	0.000496109
ENSG00000064419	ENST00000265388///ENST00000482320///ENST00000471234///ENST00000471166///ENST00000627585	23534	TNPO3|transportin 3	chr7:128954179-129055173				35.9857	37.3011	0.0517947	0.639	0.782013
ENSG00000064489	ENST00000444486///ENST00000354191///ENST00000630940///ENST00000602804///ENST00000514819///ENST00000602276///ENST00000602438///ENST00000602689	4207	BORCS8-MEF2B|MEF2BNB-MEF2B readthrough	chr19:19145566-19203424				2.06439	1.03621	-0.994401	0.44345	0.614725
ENSG00000064490	ENST00000421262///ENST00000303088///ENST00000456252///ENST00000593273///ENST00000407360///ENST00000540981///ENST00000543157///ENST00000392324///ENST00000541873///ENST00000545522///ENST00000535017///ENST00000543118///ENST00000540977///ENST00000544923///ENST00000536253	8625	RFXANK|regulatory factor X-associated ankyrin-containing protein	chr19:19145566-19203424				20.1392	16.0261	-0.329589	0.30985	0.474477
ENSG00000064545	ENST00000450333///ENST00000587406///ENST00000162044///ENST00000587985///ENST00000589448///ENST00000587583///ENST00000591443///ENST00000587925///ENST00000587096///ENST00000591031///ENST00000590216///ENST00000592369///ENST00000587915///ENST00000592147///ENST00000586357	54929	TMEM161A|transmembrane protein 161A	chr19:19119168-19138513	GO:0016021|integral component of membrane|///GO:0034644|cellular response to UV|///GO:0034599|cellular response to oxidative stress|///GO:0045739|positive regulation of DNA repair|///GO:0032526|response to retinoic acid|///GO:1902230|negative regulation of intrinsic apoptotic signaling pathway in response to DNA damage|			7.21306	8.00505	0.1503	0.51415	0.681088
ENSG00000064547	ENST00000586703///ENST00000407877///ENST00000542587///ENST00000591042///ENST00000588233///ENST00000592061///ENST00000588461///ENST00000590629///ENST00000589311	9170	LPAR2|lysophosphatidic acid receptor 2	chr19:19623667-19628930				13.3327	10.7778	-0.306906	0.10145	0.20398
ENSG00000064601	ENST00000606788///ENST00000372484///ENST00000606394///ENST00000354880///ENST00000607841///ENST00000606066///ENST00000191018///ENST00000607814///ENST00000607212///ENST00000607482///ENST00000372459///ENST00000485627///ENST00000606782///ENST00000419493///ENST00000493522///ENST00000480961///ENST00000484855///ENST00000607187///ENST00000606000	5476	CTSA|cathepsin A	chr20:45888624-45912155				56.3644	176.091	1.64347	5e-05	0.00026084
ENSG00000064607	ENST00000593795///ENST00000452918///ENST00000594773///ENST00000597095///ENST00000597163///ENST00000330854///ENST00000337018///ENST00000598863///ENST00000600239///ENST00000601879///ENST00000600377///ENST00000597280///ENST00000598240///ENST00000598202///ENST00000594445	10147	SUGP2|SURP and G patch domain containing 2	chr19:18990887-19060311				38.9626	36.7114	-0.0858603	0.703	0.826828
ENSG00000064651	ENST00000262461///ENST00000509205///ENST00000343225///ENST00000504416///ENST00000509616///ENST00000507791///ENST00000502849///ENST00000628403	6558	SLC12A2|solute carrier family 12 (sodium/potassium/chloride transporter), member 2	chr5:128083765-128189688	GO:0016021|integral component of membrane|///GO:0055085|transmembrane transport|///GO:0016020|membrane|///GO:0006810|transport|///GO:0005886|plasma membrane|///GO:0035725|sodium ion transmembrane transport|///GO:0005887|integral component of plasma membrane|///GO:0008519|ammonium transmembrane transporter activity|///GO:0072488|ammonium transmembrane transport|///GO:0015379|potassium:chloride sym…			82.3671	65.314	-0.334675	0.16565	0.298358
ENSG00000064652	ENST00000513613///ENST00000511211///ENST00000261369///ENST00000513881///ENST00000395451///ENST00000506996///ENST00000511545///ENST00000502387///ENST00000503149///ENST00000510914///ENST00000507364///ENST00000515729	28966	SNX24|sorting nexin 24	chr5:122843438-123054667				46.9596	26.4042	-0.830651	0.0348	0.0852142
ENSG00000064655	ENST00000327619///ENST00000357410///ENST00000497062///ENST00000497428///ENST00000479843///ENST00000471081///ENST00000317304///ENST00000458636///ENST00000475856///ENST00000611592	2139	EYA2|EYA transcriptional coactivator and phosphatase 2	chr20:46894623-47188844	GO:0006355|regulation of transcription, DNA-templated|///GO:0006351|transcription, DNA-templated|///GO:0000287|magnesium ion binding|///GO:0005737|cytoplasm|///GO:0004725|protein tyrosine phosphatase activity|///GO:0035335|peptidyl-tyrosine dephosphorylation|///GO:0005813|centrosome|///GO:0005654|nucleoplasm|///GO:0006281|DNA repair|///GO:0007275|multicellular organismal development|///GO:0006302…			1.67822	3.6365	1.11562	5e-05	0.00026084
ENSG00000064666	ENST00000263097///ENST00000562015///ENST00000348419///ENST00000565096///ENST00000569352///ENST00000562958///ENST00000606983///ENST00000562075///ENST00000607102///ENST00000566695///ENST00000568865///ENST00000564572	1265	CNN2|calponin 2	chr19:1026580-1039068				9.92616	4.01121	-1.3072	5e-05	0.00026084
ENSG00000064687	ENST00000611490///ENST00000526885///ENST00000530703///ENST00000525238///ENST00000524850///ENST00000531467///ENST00000527496///ENST00000433129///ENST00000435683///ENST00000533574///ENST00000530092///ENST00000529442///ENST00000525073///ENST00000532194///ENST00000612569///ENST00000525939///ENST00000531478///ENST00000524383///ENST00000263094	10347	ABCA7|ATP-binding cassette, sub-family A (ABC1), member 7	chr19:1040100-1065572				3.6288	2.86301	-0.341963	0.2494	0.403543
ENSG00000064692	ENST00000514467///ENST00000510658///ENST00000506272///ENST00000508681///ENST00000509154///ENST00000261368///ENST00000512385///ENST00000514497///ENST00000261367///ENST00000510003///ENST00000509023///ENST00000508017///ENST00000509652///ENST00000512146///ENST00000395469///ENST00000395466///ENST00000515215///ENST00000513719///ENST00000379538///ENST00000414317///ENST00000504884///ENST00000542191	9627	SNCAIP|synuclein, alpha interacting protein	chr5:122311296-122479087	GO:0005515|protein binding|///GO:0005737|cytoplasm|///GO:0031625|ubiquitin protein ligase binding|///GO:0008021|synaptic vesicle|///GO:0008219|cell death|///GO:0043025|neuronal cell body|///GO:0042734|presynaptic membrane|///GO:0042802|identical protein binding|///GO:0042417|dopamine metabolic process|///GO:0046928|regulation of neurotransmitter secretion|///GO:0090083|regulation of inclusion bod…			0.0223107	0.722748	5.01768	5e-05	0.00026084
ENSG00000064703	ENST00000533164///ENST00000369702///ENST00000475700///ENST00000524894///ENST00000534200	11218	DDX20|DEAD (Asp-Glu-Ala-Asp) box polypeptide 20	chr1:111483347-111768016				13.7041	14.2511	0.0564621	0.79785	0.884818
ENSG00000064726	ENST00000261721///ENST00000379403///ENST00000559652///ENST00000558344///ENST00000560015	53339	BTBD1|BTB (POZ) domain containing 1	chr15:82836945-83103443				58.5625	37.4465	-0.645146	0.0018	0.00665752
ENSG00000064763	ENST00000551451///ENST00000536681///ENST00000549080///ENST00000547411///ENST00000550541///ENST00000182377///ENST00000547116///ENST00000552137///ENST00000551193///ENST00000547759	55711	FAR2|fatty acyl CoA reductase 2	chr12:29149102-29381189	GO:0055114|oxidation-reduction process|///GO:0005777|peroxisome|///GO:0010025|wax biosynthetic process|///GO:0080019|fatty-acyl-CoA reductase (alcohol-forming) activity|///GO:0016021|integral component of membrane|///GO:0005789|endoplasmic reticulum membrane|///GO:0005778|peroxisomal membrane|///GO:0044255|cellular lipid metabolic process|///GO:0044281|small molecule metabolic process|///GO:00057…			0.374008	7.51634	4.32889	5e-05	0.00026084
ENSG00000064787	ENST00000371440///ENST00000422805///ENST00000395961///ENST00000371435///ENST00000448484	8537	BCAS1|breast carcinoma amplified sequence 1	chr20:53936776-54070594				10.6305	114.257	3.426	5e-05	0.00026084
ENSG00000064835	ENST00000350375///ENST00000344265///ENST00000561167///ENST00000560656	5449	POU1F1|POU class 1 homeobox 1	chr3:87259403-87276587				0.00632684	0.0520642	3.04074	1	1
ENSG00000064886	ENST00000445067///ENST00000528451///ENST00000486561///ENST00000369744///ENST00000474304///ENST00000466741///ENST00000477185///ENST00000467038///ENST00000497587///ENST00000526684///ENST00000530597///ENST00000524472///ENST00000533831///ENST00000497220///ENST00000472825///ENST00000529459///ENST00000369748	1117	CHI3L2|chitinase 3-like 2	chr1:111187173-111243440				0.358312	7.78013	4.44051	5e-05	0.00026084
ENSG00000064932	ENST00000361757///ENST00000438103///ENST00000587024///ENST00000587673///ENST00000586109///ENST00000592222///ENST00000590446///ENST00000590998///ENST00000590176///ENST00000587655	22904	SBNO2|strawberry notch homolog 2 (Drosophila)	chr19:1107635-1174283	GO:0006351|transcription, DNA-templated|///GO:0045892|negative regulation of transcription, DNA-templated|///GO:0050727|regulation of inflammatory response|///GO:0005575|cellular_component|///GO:0071222|cellular response to lipopolysaccharide|///GO:0071354|cellular response to interleukin-6|///GO:0002281|macrophage activation involved in immune response|///GO:0071348|cellular response to interleu…			13.1783	7.33154	-0.845982	0.00335	0.0114461
ENSG00000064933	ENST00000441310///ENST00000409985///ENST00000446877///ENST00000342075///ENST00000409823///ENST00000374826///ENST00000450931///ENST00000421722///ENST00000424766///ENST00000447232///ENST00000447734///ENST00000420421///ENST00000424307///ENST00000424059///ENST00000409593///ENST00000483293///ENST00000452382///ENST00000624204///ENST00000432292///ENST00000418224///ENST00000618056	5378	PMS1|PMS1 homolog 1, mismatch repair system component	chr2:189770322-189877629				22.6478	20.3782	-0.152344	0.61695	0.7648
ENSG00000064961	ENST00000416526///ENST00000470356///ENST00000333651///ENST00000417382///ENST00000453933///ENST00000435022///ENST00000488973///ENST00000262949///ENST00000585741///ENST00000486028///ENST00000483417///ENST00000487894///ENST00000464304///ENST00000493191///ENST00000585900///ENST00000461099	10362	HMG20B|high mobility group 20B	chr19:3506272-3579088				45.0848	46.3361	0.0394959	0.83635	0.906273
ENSG00000064989	ENST00000392370///ENST00000409998///ENST00000410068///ENST00000447403///ENST00000410102///ENST00000474212///ENST00000485973///ENST00000461244///ENST00000479784	10203	CALCRL|calcitonin receptor-like	chr2:187001875-187565760				0.0401324	0.0882273	1.13646	1	1
ENSG00000064995	ENST00000361288///ENST00000420584	6882	TAF11|TAF11 RNA polymerase II, TATA box binding protein (TBP)-associated factor, 28kDa	chr6:34792014-34888089	GO:0005634|nucleus|///GO:0006355|regulation of transcription, DNA-templated|///GO:0006368|transcription elongation from RNA polymerase II promoter|///GO:0046982|protein heterodimerization activity|///GO:0003713|transcription coactivator activity|///GO:0006366|transcription from RNA polymerase II promoter|///GO:0005654|nucleoplasm|///GO:0005794|Golgi apparatus|///GO:0005669|transcription factor TF…			63.0622	51.5752	-0.290099	0.05145	0.117638
ENSG00000064999	ENST00000360359///ENST00000470698	23294	ANKS1A|ankyrin repeat and sterile alpha motif domain containing 1A	chr6:34889264-35091413				6.3047	5.80287	-0.119661	0.32825	0.494819
ENSG00000065000	ENST00000345016///ENST00000589223///ENST00000355272///ENST00000585652///ENST00000591650///ENST00000586370///ENST00000589369///ENST00000592488///ENST00000591631///ENST00000586177///ENST00000590683///ENST00000591284	8943	AP3D1|adaptor-related protein complex 3, delta 1 subunit	chr19:2100987-2248679				37.3447	32.5809	-0.19688	0.3787	0.549686
ENSG00000065029	ENST00000491400///ENST00000229405///ENST00000469195///ENST00000486891///ENST00000484932///ENST00000460229///ENST00000373953///ENST00000339411///ENST00000482946///ENST00000479226///ENST00000498555	7629	ZNF76|zinc finger protein 76	chr6:35258908-35295985				11.755	10.4539	-0.169222	0.3229	0.489082
ENSG00000065054	ENST00000564033///ENST00000566198///ENST00000565855///ENST00000565086///ENST00000561844///ENST00000563587///ENST00000567504///ENST00000424542///ENST00000432365	9351	SLC9A3R2|solute carrier family 9, subfamily A (NHE3, cation proton antiporter 3), member 3 regulator 2	chr16:2025355-2039026	GO:0005886|plasma membrane|///GO:0032947|protein complex scaffold|///GO:0005634|nucleus|///GO:0008022|protein C-terminus binding|///GO:0005102|receptor binding|///GO:0012505|endomembrane system|///GO:0008013|beta-catenin binding|///GO:0005515|protein binding|///GO:0006461|protein complex assembly|///GO:0019902|phosphatase binding|///GO:0070062|extracellular exosome|///GO:0005925|focal adhesion|//…			5.84428	25.6111	2.13167	5e-05	0.00026084
ENSG00000065057	ENST00000219066///ENST00000561862///ENST00000565406///ENST00000566380///ENST00000562951///ENST00000568513///ENST00000567727///ENST00000561841///ENST00000562120///ENST00000623977	4913	NTHL1|nth-like DNA glycosylase 1	chr16:2039814-2135898				3.23662	4.58825	0.503456	0.37445	0.545493
ENSG00000065060	ENST00000192788///ENST00000452449	54887	UHRF1BP1|UHRF1 binding protein 1	chr6:34792014-34888089	GO:0042826|histone deacetylase binding|///GO:0005515|protein binding|///GO:0042802|identical protein binding|			6.99252	6.90161	-0.0188808	0.90485	0.943581
ENSG00000065135	ENST00000369851	2773	GNAI3|guanine nucleotide binding protein (G protein), alpha inhibiting activity polypeptide 3	chr1:109548610-109632051				10.5475	8.10645	-0.379764	0.00135	0.00518252
ENSG00000065150	ENST00000482642///ENST00000460070///ENST00000481455///ENST00000261574///ENST00000493281///ENST00000490369///ENST00000463157///ENST00000471898///ENST00000489058///ENST00000481689///ENST00000480611///ENST00000485433///ENST00000496368///ENST00000421861///ENST00000357602///ENST00000475420///ENST00000480641///ENST00000490680///ENST00000497270///ENST00000403772///ENST00000469360///ENST00000473582///ENS…	3843	IPO5|importin 5	chr13:97953657-98024297				48.2986	24.94	-0.953523	5e-05	0.00026084
ENSG00000065154	ENST00000368845///ENST00000471127///ENST00000467675///ENST00000483711///ENST00000476917///ENST00000490096///ENST00000492376///ENST00000539214	4942	OAT|ornithine aminotransferase	chr10:124397302-124418976				49.8764	76.3206	0.613717	5e-05	0.00026084
ENSG00000065183	ENST00000487202///ENST00000349139///ENST00000471680///ENST00000369441	10885	WDR3|WD repeat domain 3	chr1:117929719-118185223				25.0202	23.2076	-0.108496	0.65345	0.792486
ENSG00000065243	ENST00000316005///ENST00000370521///ENST00000436111///ENST00000449189///ENST00000495119///ENST00000370513///ENST00000370505	5586	PKN2|protein kinase N2	chr1:88537512-88836255				24.2059	14.578	-0.731563	0.0142	0.0401138
ENSG00000065268	ENST00000585809///ENST00000587001///ENST00000586317///ENST00000590397///ENST00000591985///ENST00000251289///ENST00000607440///ENST00000591997///ENST00000591276///ENST00000590354///ENST00000591155	57418	WDR18|WD repeat domain 18	chr19:984270-998438	GO:0005737|cytoplasm|///GO:0005654|nucleoplasm|///GO:0007275|multicellular organismal development|///GO:0005515|protein binding|			7.2813	4.2439	-0.778806	0.00145	0.00550507
ENSG00000065308	ENST00000182527	9697	TRAM2|translocation associated membrane protein 2	chr6:52497401-52576915				12.9472	6.45274	-1.00466	5e-05	0.00026084
ENSG00000065320	ENST00000173229///ENST00000436734	9423	NTN1|netrin 1	chr17:9021541-9244000	GO:0007411|axon guidance|///GO:0005576|extracellular region|///GO:0006915|apoptotic process|///GO:0007265|Ras protein signal transduction|///GO:0005515|protein binding|///GO:0006930|substrate-dependent cell migration, cell extension|///GO:0032488|Cdc42 protein signal transduction|///GO:0045773|positive regulation of axon extension|///GO:2000147|positive regulation of cell motility|///GO:0005737|c…			2.34512	1.89273	-0.309187	0.06075	0.135156
ENSG00000065325	ENST00000574745///ENST00000262441///ENST00000458005///ENST00000304773	9340	GLP2R|glucagon-like peptide 2 receptor	chr17:9822205-9892102				0.0276163	0.00232606	-3.56956	1	1
ENSG00000065328	ENST00000378714///ENST00000479669///ENST00000484800///ENST00000378694///ENST00000459751///ENST00000481292///ENST00000485659	55388	MCM10|minichromosome maintenance 10 replication initiation factor	chr10:13161553-13211104	GO:0046872|metal ion binding|///GO:0005634|nucleus|///GO:0005737|cytoplasm|///GO:0005730|nucleolus|///GO:0003690|double-stranded DNA binding|///GO:0003697|single-stranded DNA binding|///GO:0006974|cellular response to DNA damage stimulus|///GO:0005654|nucleoplasm|///GO:0006260|DNA replication|///GO:0005515|protein binding|///GO:0042802|identical protein binding|///GO:0000278|mitotic cell cycle|//…			48.1993	8.26501	-2.54392	5e-05	0.00026084
ENSG00000065357	ENST00000546878///ENST00000546995///ENST00000547015///ENST00000331886///ENST00000555090///ENST00000549629///ENST00000555218///ENST00000548479///ENST00000547324///ENST00000553084///ENST00000547358///ENST00000548549///ENST00000549368///ENST00000548407///ENST00000555025///ENST00000551615///ENST00000547535///ENST00000549323///ENST00000549097///ENST00000551156///ENST00000402956///ENST00000553783///ENS…	1606	DGKA|diacylglycerol kinase, alpha 80kDa	chr12:55901412-55954027				18.8013	13.4202	-0.486427	0.2665	0.423142
ENSG00000065361	ENST00000549282///ENST00000549061///ENST00000267101///ENST00000411731///ENST00000550869///ENST00000551085///ENST00000546884///ENST00000551242///ENST00000549672///ENST00000415288///ENST00000549472///ENST00000546748///ENST00000551176///ENST00000549205///ENST00000550828///ENST00000550070///ENST00000549644///ENST00000553131///ENST00000548709///ENST00000549832///ENST00000552691	2065	ERBB3|erb-b2 receptor tyrosine kinase 3	chr12:56079856-56113907				163.153	253.88	0.637919	0.05555	0.125594
ENSG00000065371	ENST00000184183///ENST00000405845///ENST00000487124///ENST00000467907///ENST00000460743///ENST00000496145///ENST00000459660///ENST00000479867///ENST00000495093///ENST00000484329///ENST00000620893	54763	ROPN1|rhophilin associated tail protein 1	chr3:123968520-123992178				0.00577505	0.00642292	0.153396	1	1
ENSG00000065413	ENST00000424317///ENST00000448801///ENST00000493808///ENST00000486006///ENST00000328737///ENST00000422886///ENST00000409153///ENST00000477852///ENST00000473081///ENST00000409919///ENST00000447713///ENST00000443014///ENST00000463879///ENST00000282272	91526	ANKRD44|ankyrin repeat domain 44	chr2:196967016-197311173				8.39792	2.75695	-1.60696	0.00705	0.0218591
ENSG00000065427	ENST00000319410///ENST00000302445///ENST00000568378///ENST00000564578///ENST00000569298///ENST00000562875///ENST00000566560///ENST00000566249///ENST00000566772///ENST00000568682///ENST00000570215///ENST00000565738	3735	KARS|lysyl-tRNA synthetase	chr16:75627473-75761872				255.489	220.086	-0.21519	0.20535	0.349627
ENSG00000065457	ENST00000568510///ENST00000566450///ENST00000566445///ENST00000568478///ENST00000307921///ENST00000568001///ENST00000567281///ENST00000565109///ENST00000564657///ENST00000562374	23536	ADAT1|adenosine deaminase, tRNA-specific 1	chr16:75528531-75623300	GO:0003723|RNA binding|///GO:0006396|RNA processing|///GO:0004000|adenosine deaminase activity|///GO:0046872|metal ion binding|///GO:0008033|tRNA processing|///GO:0006400|tRNA modification|///GO:0010467|gene expression|///GO:0008251|tRNA-specific adenosine deaminase activity|			120.232	92.63	-0.376268	0.1901	0.329986
ENSG00000065485	ENST00000489923///ENST00000316218///ENST00000484644///ENST00000495004///ENST00000472319///ENST00000467157///ENST00000485208///ENST00000469649	10954	PDIA5|protein disulfide isomerase family A, member 5	chr3:123067061-123274130				19.3057	27.761	0.524032	0.0612	0.136003
ENSG00000065491	ENST00000373491	55633	TBC1D22B|TBC1 domain family, member 22B	chr6:37212179-37332970	GO:0005096|GTPase activator activity|///GO:0043547|positive regulation of GTPase activity|///GO:0005515|protein binding|			7.46449	6.62382	-0.172382	0.18905	0.328628
ENSG00000065518	ENST00000184266///ENST00000485064///ENST00000492739///ENST00000461682///ENST00000491335///ENST00000496588	4710	NDUFB4|NADH dehydrogenase (ubiquinone) 1 beta subcomplex, 4, 15kDa	chr3:120596308-120602500				248.633	230.902	-0.106739	0.499	0.666238
ENSG00000065526	ENST00000375759///ENST00000471538///ENST00000438066///ENST00000442985///ENST00000487496	23013	SPEN|spen family transcriptional repressor	chr1:15834473-15940460				20.6407	10.9675	-0.912262	0.0004	0.00175048
ENSG00000065534	ENST00000360772///ENST00000418370///ENST00000578202///ENST00000464489///ENST00000346322///ENST00000583087///ENST00000475616///ENST00000515434///ENST00000514895///ENST00000513111///ENST00000508240///ENST00000510775///ENST00000511058///ENST00000504946///ENST00000503644///ENST00000514623///ENST00000506361///ENST00000510571///ENST00000354792///ENST00000359169///ENST00000360304	4638	MYLK|myosin light chain kinase	chr3:123585541-123884331				1.34007	1.55809	0.217474	0.46395	0.633924
ENSG00000065548	ENST00000337859///ENST00000421536///ENST00000437396///ENST00000477672///ENST00000481101///ENST00000468120///ENST00000496289///ENST00000498757///ENST00000445547	55854	ZC3H15|zinc finger CCCH-type containing 15	chr2:186486155-186509363				123.284	95.6002	-0.3669	0.0117	0.0340711
ENSG00000065559	ENST00000353533///ENST00000582183///ENST00000415385///ENST00000602811///ENST00000602375///ENST00000602305///ENST00000602686///ENST00000602537///ENST00000538465///ENST00000582897///ENST00000581941///ENST00000579089///ENST00000582377///ENST00000585076///ENST00000536413	6416	MAP2K4|mitogen-activated protein kinase kinase 4	chr17:11998352-12143830				29.1331	17.7597	-0.71405	5e-05	0.00026084
ENSG00000065600	ENST00000261455///ENST00000478166///ENST00000467822///ENST00000471937///ENST00000535273	55248	TMEM206|transmembrane protein 206	chr1:212363930-212414901				4.56777	6.05214	0.405957	0.08515	0.177194
ENSG00000065609	ENST00000521485///ENST00000369694///ENST00000195649///ENST00000439399///ENST00000521743///ENST00000520302///ENST00000518312///ENST00000520213///ENST00000523448///ENST00000521616///ENST00000519133///ENST00000521931///ENST00000369691///ENST00000523780///ENST00000522248///ENST00000519779///ENST00000518309///ENST00000369690///ENST00000523484///ENST00000519825///ENST00000523585///ENST00000523199	9892	SNAP91|synaptosomal-associated protein, 91kDa	chr6:83552879-83709691	GO:0005886|plasma membrane|///GO:0007268|synaptic transmission|///GO:0005543|phospholipid binding|///GO:0030276|clathrin binding|///GO:0005545|1-phosphatidylinositol binding|///GO:0005905|coated pit|///GO:0048268|clathrin coat assembly|///GO:0030136|clathrin-coated vesicle|///GO:0015031|protein transport|///GO:0019901|protein kinase binding|///GO:0005515|protein binding|///GO:2000369|regulation o…			0.0143424	0.192038	3.74303	1	1
ENSG00000065613	ENST00000335753///ENST00000369755///ENST00000474260	9748	SLK|STE20-like kinase	chr10:103967200-104029233				17.9051	18.032	0.0101856	0.9651	0.977697
ENSG00000065615	ENST00000369681///ENST00000369679///ENST00000479164	51167	CYB5R4|cytochrome b5 reductase 4	chr6:83859642-83967424				26.682	10.5963	-1.3323	5e-05	0.00026084
ENSG00000065618	ENST00000353479///ENST00000369733///ENST00000433822///ENST00000480127///ENST00000393211///ENST00000488320///ENST00000483876	1308	COL17A1|collagen, type XVII, alpha 1	chr10:104031285-104086002				0.119645	0.339274	1.50369	0.0504	0.1156
ENSG00000065621	ENST00000338595///ENST00000473401///ENST00000477078///ENST00000369707///ENST00000467629///ENST00000498052///ENST00000450629	119391	GSTO2|glutathione S-transferase omega 2	chr10:104268872-104304945				31.8421	16.2623	-0.969403	5e-05	0.00026084
ENSG00000065665	ENST00000379051///ENST00000441368///ENST00000475268///ENST00000298428///ENST00000495368///ENST00000304267///ENST00000472221///ENST00000379020///ENST00000379017///ENST00000457034///ENST00000418772///ENST00000419021///ENST00000466451///ENST00000379033	55176	SEC61A2|Sec61 translocon alpha 2 subunit	chr10:12129636-12250589				10.3552	10.1461	-0.0294197	0.94285	0.96416
ENSG00000065675	ENST00000263125///ENST00000397176///ENST00000539722///ENST00000610727	5588	PRKCQ|protein kinase C, theta	chr10:6427142-6580301				0.00335301	0.00667772	0.993898	1	1
ENSG00000065717	ENST00000262953///ENST00000591529///ENST00000586422///ENST00000443826///ENST00000590536///ENST00000589364///ENST00000586492///ENST00000587672///ENST00000589205///ENST00000587217///ENST00000591457///ENST00000590101///ENST00000587137///ENST00000590183///ENST00000589291///ENST00000592584///ENST00000587770///ENST00000592305///ENST00000591720///ENST00000587893///ENST00000455444///ENST00000426948	7089	TLE2|transducin-like enhancer of split 2	chr19:2997637-3047635	GO:0005615|extracellular space|///GO:0005634|nucleus|///GO:0006351|transcription, DNA-templated|///GO:0007165|signal transduction|///GO:0016055|Wnt signaling pathway|///GO:0045892|negative regulation of transcription, DNA-templated|///GO:0005654|nucleoplasm|///GO:0003714|transcription corepressor activity|///GO:0005515|protein binding|///GO:0090090|negative regulation of canonical Wnt signaling p…			6.645	3.59939	-0.884514	0.00255	0.00905458
ENSG00000065802	ENST00000463352///ENST00000264607///ENST00000469885///ENST00000409297///ENST00000438264///ENST00000491653///ENST00000468122///ENST00000481566///ENST00000473306	51665	ASB1|ankyrin repeat and SOCS box containing 1	chr2:238426741-238452250				10.4152	10.1144	-0.0422885	0.8675	0.924166
ENSG00000065809	ENST00000378470///ENST00000181796///ENST00000468747///ENST00000378467///ENST00000487335///ENST00000378465///ENST00000378458///ENST00000478076///ENST00000378462///ENST00000481209///ENST00000475858///ENST00000496330///ENST00000492700///ENST00000479731///ENST00000468492///ENST00000452706///ENST00000489100///ENST00000494865///ENST00000475786///ENST00000488576///ENST00000474143///ENST00000442012///ENS…	83641	FAM107B|family with sequence similarity 107, member B	chr10:14518556-14774897				20.2613	18.2092	-0.154059	0.43945	0.611165
ENSG00000065833	ENST00000369705	4199	ME1|malic enzyme 1, NADP(+)-dependent, cytosolic	chr6:83210388-83431071				32.0188	21.9413	-0.54527	5e-05	0.00026084
ENSG00000065882	ENST00000508802///ENST00000261439///ENST00000402522///ENST00000446803///ENST00000491553///ENST00000510573///ENST00000513936///ENST00000509761///ENST00000443855///ENST00000421339///ENST00000469803///ENST00000511238///ENST00000401554///ENST00000407365///ENST00000475531///ENST00000406664///ENST00000405444///ENST00000492180///ENST00000615497	23216	TBC1D1|TBC1 (tre-2/USP6, BUB2, cdc16) domain family, member 1	chr4:37891086-38139175				28.4222	36.7381	0.370261	0.0555	0.125509
ENSG00000065883	ENST00000181839///ENST00000340829///ENST00000484589///ENST00000478563///ENST00000465643///ENST00000613626///ENST00000611390	8621	CDK13|cyclin-dependent kinase 13	chr7:39950036-40097134				38.1694	38.0426	-0.00480272	0.96785	0.979422
ENSG00000065911	ENST00000394053///ENST00000409804///ENST00000470592///ENST00000477455///ENST00000489041///ENST00000409601///ENST00000488086///ENST00000462026	10797	MTHFD2|methylenetetrahydrofolate dehydrogenase (NADP+ dependent) 2, methenyltetrahydrofolate cyclohydrolase	chr2:74198561-74393882				207.436	158.268	-0.3903	0.00985	0.0293275
ENSG00000065923	ENST00000328306///ENST00000464933///ENST00000491894///ENST00000489574///ENST00000616978	84679	SLC9A7|solute carrier family 9, subfamily A (NHE7, cation proton antiporter 7), member 7	chrX:46599251-46759172	GO:0016021|integral component of membrane|///GO:0055085|transmembrane transport|///GO:0071805|potassium ion transmembrane transport|///GO:0042803|protein homodimerization activity|///GO:0000139|Golgi membrane|///GO:0035725|sodium ion transmembrane transport|///GO:0015299|solute:proton antiporter activity|///GO:1902600|hydrogen ion transmembrane transport|///GO:0006885|regulation of pH|///GO:00153…			20.9818	21.2027	0.0151146	0.954	0.971011
ENSG00000065970	ENST00000162391///ENST00000428177///ENST00000539192	55810	FOXJ2|forkhead box J2	chr12:8032702-8055503	GO:0005634|nucleus|///GO:0006355|regulation of transcription, DNA-templated|///GO:0003700|transcription factor activity, sequence-specific DNA binding|///GO:0000978|RNA polymerase II core promoter proximal region sequence-specific DNA binding|///GO:0045944|positive regulation of transcription from RNA polymerase II promoter|///GO:0043565|sequence-specific DNA binding|///GO:0005730|nucleolus|///GO…			9.19039	4.60275	-0.997631	5e-05	0.00026084
ENSG00000065978	ENST00000321358///ENST00000332220///ENST00000436427///ENST00000467957///ENST00000616651	4904	YBX1|Y box binding protein 1	chr1:42682426-42702349				487.969	373.828	-0.384415	0.0003	0.00135017
ENSG00000065989	ENST00000592685///ENST00000380702///ENST00000293683///ENST00000440014///ENST00000591971///ENST00000344979///ENST00000589073///ENST00000586275///ENST00000590407	5141	PDE4A|phosphodiesterase 4A, cAMP-specific	chr19:10391133-10469631				0.288555	0.337833	0.227465	0.8135	0.891798
ENSG00000066027	ENST00000261461///ENST00000537030///ENST00000498123///ENST00000498129///ENST00000479259	5525	PPP2R5A|protein phosphatase 2, regulatory subunit B', alpha	chr1:212285536-212361863				40.468	31.1022	-0.379766	0.0027	0.00952177
ENSG00000066032	ENST00000466387///ENST00000496251///ENST00000467488///ENST00000497804///ENST00000496558///ENST00000451966///ENST00000629316///ENST00000409971///ENST00000409266///ENST00000402739///ENST00000508970///ENST00000493024///ENST00000409550///ENST00000465616///ENST00000467892///ENST00000541047///ENST00000343114///ENST00000361291///ENST00000540488	1496	CTNNA2|catenin (cadherin-associated protein), alpha 2	chr2:79157002-80648861				0	0.00350002	18.6778	1	1
ENSG00000066044	ENST00000407627///ENST00000596154///ENST00000596459///ENST00000593807///ENST00000595499///ENST00000351593	1994	ELAVL1|ELAV like RNA binding protein 1	chr19:7958578-8489114				51.5889	34.7146	-0.571518	0.0145	0.0407911
ENSG00000066056	ENST00000372476///ENST00000485125///ENST00000480269///ENST00000488437///ENST00000471187///ENST00000461061///ENST00000473014///ENST00000492599///ENST00000492874///ENST00000538015	7075	TIE1|tyrosine kinase with immunoglobulin-like and EGF-like domains 1	chr1:43300992-43323108				0.0247097	0.0249738	0.015338	1	1
ENSG00000066084	ENST00000549620///ENST00000301180///ENST00000546719///ENST00000552328///ENST00000546732	57609	DIP2B|disco-interacting protein 2 homolog B	chr12:50504984-50748667				20.608	24.5965	0.255253	0.03205	0.0793912
ENSG00000066117	ENST00000394963///ENST00000381513///ENST00000551966///ENST00000550477///ENST00000547247///ENST00000547637///ENST00000551497///ENST00000548573///ENST00000549274///ENST00000550280///ENST00000551352///ENST00000549526	6602	SMARCD1|SWI/SNF related, matrix associated, actin dependent regulator of chromatin, subfamily d, member 1	chr12:50084971-50100712	GO:0006357|regulation of transcription from RNA polymerase II promoter|///GO:0007399|nervous system development|///GO:0032947|protein complex scaffold|///GO:0006338|chromatin remodeling|///GO:0003713|transcription coactivator activity|///GO:0016514|SWI/SNF complex|///GO:0005515|protein binding|///GO:0071564|npBAF complex|///GO:0006337|nucleosome disassembly|///GO:0048096|chromatin-mediated mainte…			69.9988	68.7599	-0.025763	0.89545	0.938414
ENSG00000066135	ENST00000372396///ENST00000463151///ENST00000485249///ENST00000472265///ENST00000481296	9682	KDM4A|lysine (K)-specific demethylase 4A	chr1:43650157-43931165				27.5174	31.7524	0.206522	0.2381	0.390261
ENSG00000066136	ENST00000467203///ENST00000424419///ENST00000427410///ENST00000447388///ENST00000425457///ENST00000453631///ENST00000456393///ENST00000372654///ENST00000534399///ENST00000372653///ENST00000372669///ENST00000372652///ENST00000372651///ENST00000531464///ENST00000440226///ENST00000525290///ENST00000530965///ENST00000416859///ENST00000308733///ENST00000414185///ENST00000525349///ENST00000483091///ENS…	4802	NFYC|nuclear transcription factor Y, gamma	chr1:40690379-40771603				50.2623	51.5525	0.0365678	0.887	0.933497
ENSG00000066185	ENST00000372565///ENST00000611861///ENST00000475426///ENST00000461083	84217	ZMYND12|zinc finger, MYND-type containing 12	chr1:42430328-42654664				0.576573	0.94958	0.719786	0.4914	0.659791
ENSG00000066230	ENST00000264938///ENST00000514375///ENST00000507407	6550	SLC9A3|solute carrier family 9, subfamily A (NHE3, cation proton antiporter 3), member 3	chr5:473235-524332				0.923899	1.89169	1.03387	0.10825	0.214989
ENSG00000066248	ENST00000264051///ENST00000373552///ENST00000424488///ENST00000489127///ENST00000461944///ENST00000416114///ENST00000420650///ENST00000409079///ENST00000414326	25791	NGEF|neuronal guanine nucleotide exchange factor	chr2:232697298-233015885				2.21222	3.24577	0.553068	0.60435	0.755476
ENSG00000066279	ENST00000367409///ENST00000367408///ENST00000294732///ENST00000612785	259266	ASPM|abnormal spindle microtubule assembly	chr1:197084127-197146694				16.5282	6.16023	-1.42387	5e-05	0.00026084
ENSG00000066294	ENST00000368054///ENST00000466767///ENST00000368048///ENST00000311224///ENST00000368051///ENST00000360056///ENST00000368047///ENST00000534968	8832	CD84|CD84 molecule	chr1:160537072-160579516	GO:0005886|plasma membrane|///GO:0007156|homophilic cell adhesion via plasma membrane adhesion molecules|///GO:0005887|integral component of plasma membrane|///GO:0004872|receptor activity|///GO:0005515|protein binding|///GO:0006952|defense response|///GO:0070062|extracellular exosome|///GO:0007596|blood coagulation|///GO:0050900|leukocyte migration|			0	0.010778	18.6778	1	1
ENSG00000066322	ENST00000372458///ENST00000468865///ENST00000464204///ENST00000470968///ENST00000487209///ENST00000470769///ENST00000497569///ENST00000482302///ENST00000497050///ENST00000478481///ENST00000479439///ENST00000465321///ENST00000479686///ENST00000496932///ENST00000621943///ENST00000413844	64834	ELOVL1|ELOVL fatty acid elongase 1	chr1:43363396-43368074				88.4532	125.617	0.506044	5e-05	0.00026084
ENSG00000066336	ENST00000378538///ENST00000227163///ENST00000533030///ENST00000533968	6688	SPI1|Spi-1 proto-oncogene	chr11:47354859-47378576				0	0	0	1	1
ENSG00000066379	ENST00000471008///ENST00000332435///ENST00000376782///ENST00000359374///ENST00000376785///ENST00000463141	30834	ZNRD1|zinc ribbon domain containing 1	chr6:30001010-30064909				23.6594	23.9634	0.0184198	0.92555	0.954322
ENSG00000066382	ENST00000448418///ENST00000358117///ENST00000524667///ENST00000529220///ENST00000526437///ENST00000525519///ENST00000524636///ENST00000528686	744	MPPED2|metallophosphoesterase domain containing 2	chr11:30384492-30630508				9.42566	2.39717	-1.97526	5e-05	0.00026084
ENSG00000066405	ENST00000343735///ENST00000183605///ENST00000479660	51208	CLDN18|claudin 18	chr3:137998734-138033655				0	0.0168794	18.6778	1	1
ENSG00000066422	ENST00000312938///ENST00000471673///ENST00000461821	27107	ZBTB11|zinc finger and BTB domain containing 11	chr3:101648888-101679217	GO:0046872|metal ion binding|///GO:0006355|regulation of transcription, DNA-templated|///GO:0003700|transcription factor activity, sequence-specific DNA binding|///GO:0006351|transcription, DNA-templated|///GO:0005654|nucleoplasm|///GO:0000977|RNA polymerase II regulatory region sequence-specific DNA binding|///GO:0005515|protein binding|///GO:0003674|molecular_function|///GO:0008150|biological_p…			22.7665	15.469	-0.557535	5e-05	0.00026084
ENSG00000066427	ENST00000558190///ENST00000564606///ENST00000568290///ENST00000526245///ENST00000359366///ENST00000502250///ENST00000503767///ENST00000340660///ENST00000532032///ENST00000555381///ENST00000557311///ENST00000555816///ENST00000554592///ENST00000556315///ENST00000556898///ENST00000554672///ENST00000557030///ENST00000556644///ENST00000553488///ENST00000554040///ENST00000556958///ENST00000556374///ENS…	4287	ATXN3|ataxin 3	chr14:91965990-92106621				42.1937	29.657	-0.508653	0.15565	0.285293
ENSG00000066455	ENST00000163416///ENST00000555793///ENST00000554700	9950	GOLGA5|golgin A5	chr14:92794230-92839963				43.0228	72.375	0.750389	5e-05	0.00026084
ENSG00000066468	ENST00000358487///ENST00000478859///ENST00000356226///ENST00000369060///ENST00000604236///ENST00000369059///ENST00000467584///ENST00000429361///ENST00000346997///ENST00000457416///ENST00000360144///ENST00000369056///ENST00000369058///ENST00000336553///ENST00000463870///ENST00000490349///ENST00000359354///ENST00000491475///ENST00000613324///ENST00000611527///ENST00000491111///ENST00000357555///ENS…	2263	FGFR2|fibroblast growth factor receptor 2	chr10:121478333-121598458				4.8162	4.84449	0.00845079	0.9694	0.97993
ENSG00000066557	ENST00000370952	55631	LRRC40|leucine rich repeat containing 40	chr1:69568397-70205620				9.3776	7.01745	-0.418272	0.0014	0.00534625
ENSG00000066583	ENST00000514194///ENST00000173527	51015	ISOC1|isochorismatase domain containing 1	chr5:129094750-129114028				173.409	94.6419	-0.873628	5e-05	0.00026084
ENSG00000066629	ENST00000554479///ENST00000555145///ENST00000327921///ENST00000556199///ENST00000556835///ENST00000262233///ENST00000334192///ENST00000555096///ENST00000556714///ENST00000553720///ENST00000556947///ENST00000556758///ENST00000557741///ENST00000555277///ENST00000554553///ENST00000554386///ENST00000555812///ENST00000554111///ENST00000557313///ENST00000553313	2009	EML1|echinoderm microtubule associated protein like 1	chr14:99737692-99942060	GO:0005515|protein binding|///GO:0005509|calcium ion binding|///GO:0005874|microtubule|///GO:0008017|microtubule binding|///GO:0005829|cytosol|///GO:0007420|brain development|///GO:0000226|microtubule cytoskeleton organization|///GO:0048471|perinuclear region of cytoplasm|///GO:0007052|mitotic spindle organization|///GO:0005875|microtubule associated complex|///GO:0015631|tubulin binding|///GO:00…			43.906	33.5505	-0.388083	0.0694	0.150579
ENSG00000066651	ENST00000461129///ENST00000479748///ENST00000368332///ENST00000468097///ENST00000473273///ENST00000444121///ENST00000446681///ENST00000489934///ENST00000453993///ENST00000466316///ENST00000334379	60487	TRMT11|tRNA methyltransferase 11 homolog	chr6:125986429-126039276				30.2115	14.6028	-1.04886	0.00105	0.00416101
ENSG00000066654	ENST00000381337///ENST00000396083///ENST00000570231///ENST00000565248///ENST00000569768	55623	THUMPD1|THUMP domain containing 1	chr16:20610242-20925006				36.792	36.652	-0.00549753	0.9738	0.982405
ENSG00000066697	ENST00000395067///ENST00000398977///ENST00000374885///ENST00000374886///ENST00000489377///ENST00000622639///ENST00000613183	91283	MSANTD3|Myb/SANT-like DNA-binding domain containing 3	chr9:100427155-100577636				19.3804	13.969	-0.472367	0.0012	0.0046836
ENSG00000066735	ENST00000423312///ENST00000315264	26153	KIF26A|kinesin family member 26A	chr14:104138722-104180894				0.352793	0.531725	0.59186	0.00125	0.00484887
ENSG00000066739	ENST00000359933///ENST00000555263///ENST00000261834///ENST00000553643///ENST00000554151///ENST00000473234///ENST00000488421	55102	ATG2B|autophagy related 2B	chr14:96279201-96387288	GO:0000045|autophagosome assembly|///GO:0000407|pre-autophagosomal structure|///GO:0006995|cellular response to nitrogen starvation|///GO:0044804|nucleophagy|///GO:0019898|extrinsic component of membrane|///GO:0005811|lipid particle|///GO:0000422|mitophagy|///GO:0034045|pre-autophagosomal structure membrane|			11.2411	12.0899	0.105011	0.7141	0.834597
ENSG00000066777	ENST00000520381///ENST00000518789///ENST00000262215///ENST00000518290///ENST00000517955///ENST00000522878///ENST00000518230///ENST00000519436	10565	ARFGEF1|ADP-ribosylation factor guanine nucleotide-exchange factor 1 (brefeldin A-inhibited)	chr8:66964098-67343677				23.367	36.4916	0.64309	0.0104	0.0307552
ENSG00000066813	ENST00000329697///ENST00000566998///ENST00000565322///ENST00000565232///ENST00000567001///ENST00000568098///ENST00000564849///ENST00000569131///ENST00000569364///ENST00000563943///ENST00000567288///ENST00000569327///ENST00000569163///ENST00000568882///ENST00000566384///ENST00000569344///ENST00000562026///ENST00000564855///ENST00000414188	348158	ACSM2B|acyl-CoA synthetase medium-chain family member 2B	chr16:20536225-20576427	GO:0005524|ATP binding|///GO:0046872|metal ion binding|///GO:0008152|metabolic process|///GO:0005739|mitochondrion|///GO:0006805|xenobiotic metabolic process|///GO:0003824|catalytic activity|///GO:0006631|fatty acid metabolic process|///GO:0005759|mitochondrial matrix|///GO:0003674|molecular_function|///GO:0044281|small molecule metabolic process|///GO:0047760|butyrate-CoA ligase activity|///GO:0…			0	0	0	1	1
ENSG00000066827	ENST00000520356///ENST00000520727///ENST00000429442///ENST00000377838///ENST00000523924///ENST00000523243///ENST00000518408///ENST00000520214///ENST00000521673///ENST00000523399///ENST00000522723///ENST00000517307///ENST00000519827///ENST00000522974///ENST00000523040///ENST00000522257///ENST00000518191	57623	ZFAT|zinc finger and AT hook domain containing	chr8:134477787-134713049				7.47078	7.62457	0.0293973	0.9032	0.942824
ENSG00000066855	ENST00000523170///ENST00000523222///ENST00000522239///ENST00000424808///ENST00000262146///ENST00000517944///ENST00000518800///ENST00000518636///ENST00000521247///ENST00000527155///ENST00000518352///ENST00000523158///ENST00000520398///ENST00000527553///ENST00000458689	9650	MTFR1|mitochondrial fission regulator 1	chr8:65644733-65842322				53.2554	35.7087	-0.576651	0.01165	0.0339809
ENSG00000066923	ENST00000426455///ENST00000394018///ENST00000416412///ENST00000317296///ENST00000422690///ENST00000496157///ENST00000439782///ENST00000482546///ENST00000459699///ENST00000491498///ENST00000440830///ENST00000477469///ENST00000476057///ENST00000479359///ENST00000412190///ENST00000451963///ENST00000492674///ENST00000620100///ENST00000615138	10734	STAG3|stromal antigen 3	chr7:100177562-100272218				4.98978	4.07257	-0.293037	0.40575	0.577676
ENSG00000066926	ENST00000262093///ENST00000382873///ENST00000585494///ENST00000591977///ENST00000592699///ENST00000585699///ENST00000591215///ENST00000585747///ENST00000585878///ENST00000592111	2235	FECH|ferrochelatase	chr18:57548282-57586772				14.0512	8.06423	-0.801082	0.00035	0.00155594
ENSG00000066933	ENST00000356056///ENST00000561618///ENST00000568042///ENST00000564571///ENST00000568481///ENST00000564699///ENST00000563071///ENST00000563542///ENST00000568781///ENST00000566885///ENST00000566744///ENST00000563648///ENST00000565528///ENST00000567095///ENST00000563925///ENST00000567560///ENST00000568438///ENST00000569314///ENST00000564931///ENST00000444904///ENST00000424560	4649	MYO9A|myosin IXA	chr15:71818395-72155459				17.3301	8.58112	-1.01404	0.00045	0.0019463
ENSG00000067048	ENST00000360160///ENST00000454054///ENST00000336079///ENST00000493363///ENST00000440554///ENST00000469101///ENST00000472510///ENST00000463199///ENST00000495478	8653	DDX3Y|DEAD (Asp-Glu-Ala-Asp) box helicase 3, Y-linked	chrY:12904107-12920478				0	0	0	1	1
ENSG00000067057	ENST00000607886///ENST00000381125///ENST00000495715///ENST00000381075///ENST00000421751///ENST00000407806///ENST00000415005///ENST00000468050///ENST00000460445///ENST00000413079///ENST00000381072///ENST00000433193	5214	PFKP|phosphofructokinase, platelet	chr10:3066332-3172841				265.813	182.496	-0.542546	0.0299	0.07505
ENSG00000067064	ENST00000381344///ENST00000491735///ENST00000427898///ENST00000429642///ENST00000482091	3422	IDI1|isopentenyl-diphosphate delta isomerase 1	chr10:971145-1049170				148.663	92.7427	-0.680741	5e-05	0.00026084
ENSG00000067066	ENST00000264052///ENST00000432979///ENST00000409824///ENST00000409341///ENST00000409112///ENST00000340126///ENST00000409897///ENST00000470940///ENST00000466710///ENST00000413284///ENST00000452345///ENST00000462751///ENST00000494508///ENST00000492546///ENST00000459786///ENST00000431952///ENST00000494901///ENST00000488180///ENST00000427101	6672	SP100|SP100 nuclear antigen	chr2:230415941-230580006				22.6694	70.3145	1.63308	5e-05	0.00026084
ENSG00000067082	ENST00000461124///ENST00000497571///ENST00000173785///ENST00000492125///ENST00000469435///ENST00000380946///ENST00000542957	1316	KLF6|Kruppel-like factor 6	chr10:3775995-3785281				17.5546	34.8938	0.991121	5e-05	0.00026084
ENSG00000067113	ENST00000264775///ENST00000307259///ENST00000520263///ENST00000509667///ENST00000515132///ENST00000502907	8611	PLPP1|phosphatidic acid phosphatase type 2A	chr5:55307759-55535050	GO:0006629|lipid metabolic process|///GO:0016020|membrane|///GO:0005886|plasma membrane|///GO:0005887|integral component of plasma membrane|///GO:0030521|androgen receptor signaling pathway|///GO:0007205|protein kinase C-activating G-protein coupled receptor signaling pathway|///GO:0008285|negative regulation of cell proliferation|///GO:0006665|sphingolipid metabolic process|///GO:0008195|phospha…			7.94821	21.6659	1.44672	0.0004	0.00175048
ENSG00000067141	ENST00000339362///ENST00000560262///ENST00000558964///ENST00000558485///ENST00000560328///ENST00000560352///ENST00000560407///ENST00000558807///ENST00000560808///ENST00000558886///ENST00000261908	4756	NEO1|neogenin 1	chr15:73051709-73305206				56.739	31.2017	-0.862714	0.00345	0.0117448
ENSG00000067167	ENST00000521425///ENST00000262213///ENST00000521049///ENST00000520700///ENST00000518678	23471	TRAM1|translocation associated membrane protein 1	chr8:70573441-70608387				142.231	124.247	-0.195019	0.3219	0.488019
ENSG00000067177	ENST00000373542///ENST00000373545///ENST00000373539///ENST00000339490///ENST00000541944	5255	PHKA1|phosphorylase kinase, alpha 1 (muscle)	chrX:72578813-72714319	GO:0006468|protein phosphorylation|///GO:0005886|plasma membrane|///GO:0005829|cytosol|///GO:0005975|carbohydrate metabolic process|///GO:0003824|catalytic activity|///GO:0005516|calmodulin binding|///GO:0005964|phosphorylase kinase complex|///GO:0004689|phosphorylase kinase activity|///GO:0044281|small molecule metabolic process|///GO:0005977|glycogen metabolic process|///GO:0006006|glucose meta…			9.50874	3.68057	-1.36933	5e-05	0.00026084
ENSG00000067182	ENST00000534885///ENST00000162749///ENST00000536717///ENST00000543995///ENST00000540022///ENST00000543359///ENST00000537842///ENST00000535038///ENST00000539372///ENST00000366159///ENST00000437813///ENST00000543048///ENST00000440083///ENST00000536194///ENST00000535958///ENST00000538363	7132	TNFRSF1A|tumor necrosis factor receptor superfamily, member 1A	chr12:6328756-6342114				151.941	97.9327	-0.633648	5e-05	0.00026084
ENSG00000067191	ENST00000394303///ENST00000539338///ENST00000394310///ENST00000344140///ENST00000582544///ENST00000577582///ENST00000536613///ENST00000492737///ENST00000582877///ENST00000582414///ENST00000577926///ENST00000622445	782	CACNB1|calcium channel, voltage-dependent, beta 1 subunit	chr17:39173289-39197703				1.39589	3.65235	1.38764	0.0002	0.000933714
ENSG00000067208	ENST00000370331///ENST00000491940///ENST00000492513///ENST00000468580///ENST00000492613///ENST00000474806///ENST00000466778///ENST00000540033	7813	EVI5|ecotropic viral integration site 5	chr1:92508695-92792404				3.54989	3.4514	-0.0405915	0.89385	0.937788
ENSG00000067221	ENST00000541638///ENST00000564777///ENST00000561480///ENST00000561656///ENST00000359750///ENST00000563229///ENST00000565240///ENST00000566081///ENST00000567052///ENST00000562453///ENST00000567876///ENST00000316911///ENST00000316900	9399	STOML1|stomatin (EPB72)-like 1	chr15:73978922-73994622				1.66261	1.77137	0.0914164	0.7492	0.857102
ENSG00000067225	ENST00000564440///ENST00000565184///ENST00000335181///ENST00000565143///ENST00000567118///ENST00000565154///ENST00000568459///ENST00000561609///ENST00000563986///ENST00000569857///ENST00000570166///ENST00000564993///ENST00000563275///ENST00000568743///ENST00000562784///ENST00000564178///ENST00000562997///ENST00000567087///ENST00000564276///ENST00000566809///ENST00000569050///ENST00000449901///ENS…	5315	PKM|pyruvate kinase, muscle	chr15:72199028-72231822				2456.42	1560.76	-0.654308	5e-05	0.00026084
ENSG00000067248	ENST00000251636///ENST00000504778///ENST00000513447///ENST00000508346///ENST00000621106	54505	DHX29|DEAH (Asp-Glu-Ala-His) box polypeptide 29	chr5:55233933-55307722	GO:0005524|ATP binding|///GO:0003676|nucleic acid binding|///GO:0005739|mitochondrion|///GO:0005737|cytoplasm|///GO:0004386|helicase activity|///GO:0008026|ATP-dependent helicase activity|///GO:0003743|translation initiation factor activity|///GO:0016282|eukaryotic 43S preinitiation complex|///GO:0004004|ATP-dependent RNA helicase activity|///GO:0006413|translational initiation|///GO:0006396|RNA …			23.6604	18.4377	-0.359816	0.0019	0.00698006
ENSG00000067334	ENST00000436063///ENST00000462746///ENST00000496535///ENST00000359208///ENST00000460191///ENST00000496672///ENST00000528680	30836	DNTTIP2|deoxynucleotidyltransferase, terminal, interacting protein 2	chr1:93866282-93879918				39.8526	45.1992	0.181623	0.24635	0.399944
ENSG00000067365	ENST00000563958///ENST00000381920///ENST00000163678///ENST00000564554///ENST00000561758///ENST00000567295///ENST00000563037///ENST00000568967///ENST00000564624///ENST00000572956///ENST00000561993///ENST00000563501///ENST00000565866///ENST00000562151///ENST00000564107///ENST00000564133///ENST00000562973///ENST00000569597	79091	METTL22|methyltransferase like 22	chr16:8621682-8649654				27.0383	31.5857	0.224264	0.2563	0.410867
ENSG00000067369	ENST00000382044///ENST00000263801///ENST00000476454///ENST00000411772///ENST00000382039///ENST00000450115///ENST00000434595///ENST00000434561///ENST00000572085///ENST00000571145///ENST00000417342///ENST00000467474///ENST00000413546///ENST00000480860///ENST00000605155///ENST00000414758///ENST00000477089	7158	TP53BP1|tumor protein p53 binding protein 1	chr15:43358171-43510728				17.7906	14.0607	-0.339448	0.21515	0.361826
ENSG00000067445	ENST00000411534///ENST00000452830///ENST00000442098///ENST00000430420///ENST00000453081///ENST00000173898///ENST00000319167///ENST00000445561///ENST00000375022///ENST00000399736///ENST00000440072///ENST00000484031///ENST00000474933///ENST00000431115///ENST00000440759///ENST00000375041///ENST00000449980///ENST00000416704///ENST00000427099///ENST00000492142///ENST00000492706///ENST00000475183///ENS…	7216	TRO|trophinin	chrX:54920461-54931431				0.0360006	0.1146	1.67051	1	1
ENSG00000067533	ENST00000366932///ENST00000491428	51018	RRP15|ribosomal RNA processing 15 homolog	chr1:218285286-218337983				67.7416	34.4837	-0.974126	0.0003	0.00135017
ENSG00000067560	ENST00000418115///ENST00000454011///ENST00000422781///ENST00000445425///ENST00000431929///ENST00000265538	387	RHOA|ras homolog family member A	chr3:49359144-49416475				404.886	388.58	-0.0593069	0.62315	0.769813
ENSG00000067596	ENST00000592258///ENST00000540306///ENST00000262415///ENST00000605777///ENST00000587044///ENST00000589898///ENST00000587574	1659	DHX8|DEAH (Asp-Glu-Ala-His) box polypeptide 8	chr17:43483864-43610338				30.7075	15.4956	-0.986727	0.0307	0.0766856
ENSG00000067601	ENST00000412466///ENST00000414507		PMS2P4|	chr7:67295607-67321526				6.51798	6.62547	0.0235975	0.9575	0.97301
ENSG00000067606	ENST00000378567///ENST00000468310///ENST00000484419///ENST00000503297///ENST00000479566///ENST00000466651///ENST00000400921///ENST00000495347///ENST00000461106///ENST00000461465///ENST00000470596///ENST00000496325///ENST00000481140///ENST00000482686///ENST00000486681///ENST00000470986///ENST00000470511///ENST00000471018///ENST00000466352///ENST00000497183///ENST00000419838///ENST00000479263///ENS…	5590	PRKCZ|protein kinase C, zeta	chr1:2050469-2220738				15.6021	37.2887	1.257	5e-05	0.00026084
ENSG00000067646	ENST00000383052///ENST00000625061///ENST00000469869///ENST00000443793///ENST00000449237///ENST00000478783///ENST00000155093	7544	ZFY|zinc finger protein, Y-linked	chrY:2935280-3002626	GO:0003677|DNA binding|///GO:0046872|metal ion binding|///GO:0005634|nucleus|///GO:0006355|regulation of transcription, DNA-templated|///GO:0003700|transcription factor activity, sequence-specific DNA binding|///GO:0006351|transcription, DNA-templated|///GO:0005654|nucleoplasm|///GO:0007275|multicellular organismal development|///GO:0000977|RNA polymerase II regulatory region sequence-specific DN…			0.0135729	0	-16.6898	1	1
ENSG00000067704	ENST00000366922///ENST00000490891///ENST00000488777///ENST00000467924	55699	IARS2|isoleucyl-tRNA synthetase 2, mitochondrial	chr1:220094101-220148041				71.8294	62.0319	-0.211563	0.24435	0.397486
ENSG00000067715	ENST00000393240///ENST00000261205///ENST00000457153///ENST00000552074///ENST00000549454///ENST00000547046///ENST00000549671///ENST00000551304///ENST00000552744///ENST00000552624///ENST00000446242///ENST00000549559	6857	SYT1|synaptotagmin I	chr12:78863992-79503396				17.8554	10.2824	-0.796189	0.00065	0.00271388
ENSG00000067798	ENST00000549464///ENST00000536525///ENST00000397909///ENST00000549369///ENST00000551277///ENST00000547725///ENST00000550503///ENST00000550673///ENST00000552895///ENST00000550788///ENST00000548948///ENST00000552300///ENST00000551162///ENST00000547884	89795	NAV3|neuron navigator 3	chr12:77830904-78213008				1.05829	0.942468	-0.167218	0.62955	0.775134
ENSG00000067829	ENST00000370092///ENST00000217901///ENST00000454076///ENST00000370093///ENST00000427365///ENST00000444450///ENST00000444338///ENST00000497043///ENST00000495356///ENST00000461215///ENST00000491235///ENST00000619865	3421	IDH3G|isocitrate dehydrogenase 3 (NAD+) gamma	chrX:153785765-153798505				36.8544	41.9063	0.185329	0.4609	0.631382
ENSG00000067836	ENST00000322048///ENST00000591292///ENST00000587843///ENST00000587377///ENST00000588201///ENST00000592019///ENST00000586504///ENST00000591392///ENST00000587711///ENST00000586153///ENST00000586336///ENST00000589543///ENST00000585653///ENST00000585871///ENST00000590198///ENST00000592112	79641	ROGDI|rogdi homolog	chr16:4796967-4802950				29.8964	32.3822	0.115226	0.63215	0.776923
ENSG00000067840	ENST00000164640///ENST00000484792///ENST00000475140///ENST00000483693///ENST00000480418///ENST00000480650///ENST00000468491///ENST00000544474///ENST00000393758	57595	PDZD4|PDZ domain containing 4	chrX:153802165-153830565				2.12822	2.85489	0.42379	0.1407	0.263801
ENSG00000067842	ENST00000349466///ENST00000370186///ENST00000393842///ENST00000359149///ENST00000460549///ENST00000496610///ENST00000263519	492	ATP2B3|ATPase, Ca++ transporting, plasma membrane 3	chrX:153517675-153582939				0	0.00243207	18.6778	1	1
[truncated: 59,579 more rows]
